# Supplementary material for: Secondary amines as coupling partners in direct catalytic asymmetric reductive amination
Source: PubMed Central journal article supplement — Chem Sci. 2019 Mar 14;10(16):4509–14. doi: 10.1039/c9sc00323a (PMC6482873; doi:10.1039/c9sc00323a), 2019-03-14

Supplementary Information for

## Secondary Amines as Coupling Partners in Direct Catalytic Asymmetric Reductive Amination

Zitong Wu<sup>1</sup>, Shaozhi Du<sup>1</sup>, Wenkun Yang<sup>1</sup>, Guorui Gao<sup>2</sup>, Xiongyu Yang<sup>1</sup>, Haizhou Huang<sup>1</sup> and Mingxin Chang<sup>1\*</sup>

<sup>1</sup>Shanxi Key Laboratory of Natural Products & Chemical Biology, College of Chemistry & Pharmacy, Northwest A&F University, 22 Xinong Road, Yangling, Shanxi 712100, China. <sup>2</sup>College of Chemistry, Chemical Engineering and Materials Science, Collaborative Innovation Center of Functionalized Probes for Chemical Imaging in Universities of Shandong, Shandong Normal University, 88 Wenhudong Road, Jinan 250014, China. \*e-mail: mxchang@nwsuaf.edu.cn

### CONTENTS

|     |                                                      |     |
|-----|------------------------------------------------------|-----|
| I   | General remarks                                      | S2  |
| II  | General procedure for asymmetric reductive amination | S2  |
| III | Procedure for the synthesis of rivastigmine          | S34 |
| IV  | Procedure for the synthesis of secondary amine       | S35 |
| V   | Mechanistic study                                    | S37 |
| VI  | References                                           | S38 |
| VII | NMR & HRMS Spectra                                   | S39 |

## I. General remarks

All reactions were performed in the nitrogen-filled glovebox or under nitrogen using standard Schlenk techniques unless otherwise noted. Column chromatography was performed using silica gel 60 (200 – 300 mesh). <sup>1</sup>H NMR, <sup>13</sup>C NMR and <sup>31</sup>P NMR spectral data were obtained from Bruker 500 MHz spectrometers. Chemical shifts are reported in ppm. Enantiomeric excess values were determined by chiral HPLC on an Agilent 1220 Series instrument or using <sup>1</sup>H NMR with chemical shift reagent to determine the enantiomeric excesses. All new products were further characterized by HRMS. A positive ion mass spectrum of sample was acquired on a Thermo Scientific LTQ Orbitrap XL mass spectrometer or AB SCIEX LC-30A+SelexION+TripleTOF5600+ with an electrospray ionization source.

## II. General Procedure for Asymmetric Reductive Amination

Chiral ligands **L5–L9** were prepared according to literatures.<sup>1</sup>

In a nitrogen-filled glovebox, [Ir(COD)Cl]<sub>2</sub> (10 μmol) and **L8a** (46 μmol) was dissolved in anhydrous CH<sub>2</sub>Cl<sub>2</sub> (1.0 mL), stirred for 20 min, and equally divided into 10 vials charged with ketones (0.2 mmol) and pyrrolidine (0.22 mmol) in anhydrous CH<sub>2</sub>Cl<sub>2</sub> solution (0.5 mL). Then Ti(O*i*-Pr)<sub>4</sub> (1.2 equiv.), 1,4-diazabicyclo[2.2.2]octane (DABCO) (0.1 eq), and I<sub>2</sub> (1 mol%) were added and the total solution was made to 2.0 mL (DCM/THF/DCE = 1:1:1.5) for each vial. The resulting vials were transferred to an autoclave, which was charged with 40 atm of H<sub>2</sub>, and stirred at 4 °C for 20 h. The hydrogen gas was released slowly and the solution was quenched with aqueous sodium bicarbonate solution. The organic phase was concentrated and passed through a short column of silica gel to remove the metal complex to give the crude products, which were purified by column chromatography and then analyzed by chiral HPLC or using <sup>1</sup>H NMR with chemical shift reagent to determine the enantiomeric excesses.

<sup>1</sup>H NMR method for determination the e.e. values: The amine product **3** was mixed with equal amount (mol/mol) of (*S* or *R*)-2-acetoxy-2-phenylacetic acid and dissolved in CDCl<sub>3</sub>. Diastereoisomers are formed and the proton signal of amine β-methyl will be splitted. From integration ratio the e.e. value could be calculated.

**(S)-1-(1-phenylethyl)pyrrolidine (3a):**<sup>2</sup> 91% yield, 97% ee, brown oil. <sup>1</sup>H NMR (500 MHz, CDCl<sub>3</sub>): δ 7.24–7.42 (m, 5H, Ar-H), 3.20 (q, *J* = 6.3 Hz, 1H, CH), 2.60 (m, 2H, N-CH<sub>2</sub>), 2.40 (m, 2H, N-CH<sub>2</sub>), 1.81 (m, 4H, 2\*CH<sub>2</sub>), 1.46 (d, *J* = 6.4 Hz, 3H, CH<sub>3</sub>); <sup>13</sup>C NMR (125 MHz, CDCl<sub>3</sub>): δ 145.3 (Ar-CC), 128.3, 127.3, 127.0, 66.1, 53.0, 23.4, 23.1. Enantiomeric excess was determined by chiral HPLC: Chiralpak OJ-3 column, Hex/IPA=97:3, 0.6 mL/min, 220 nm, 7.08 min, 7.53 min.

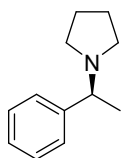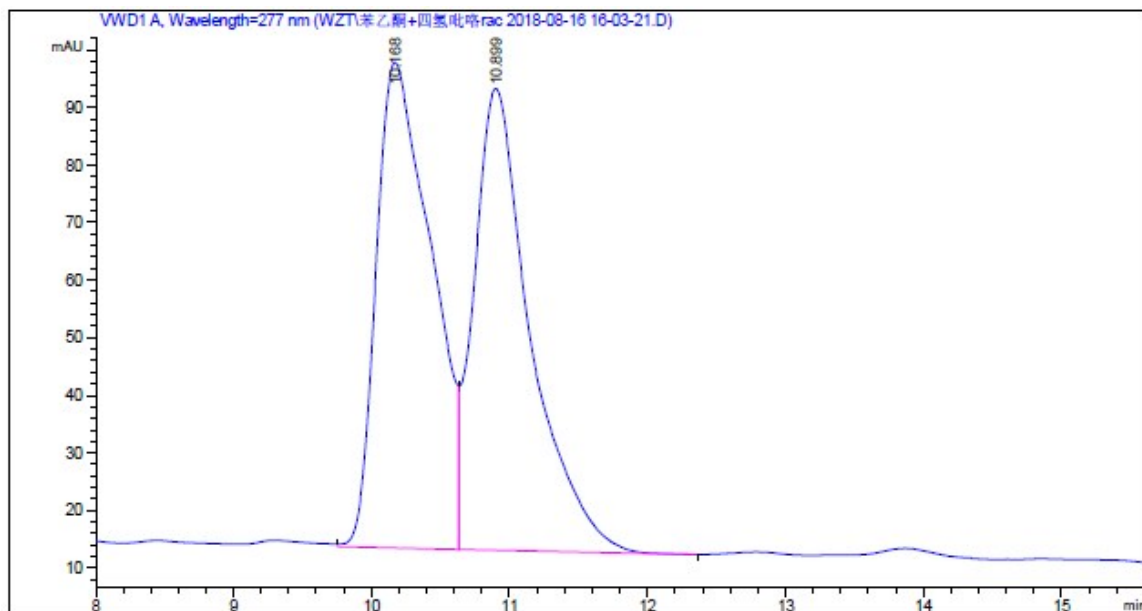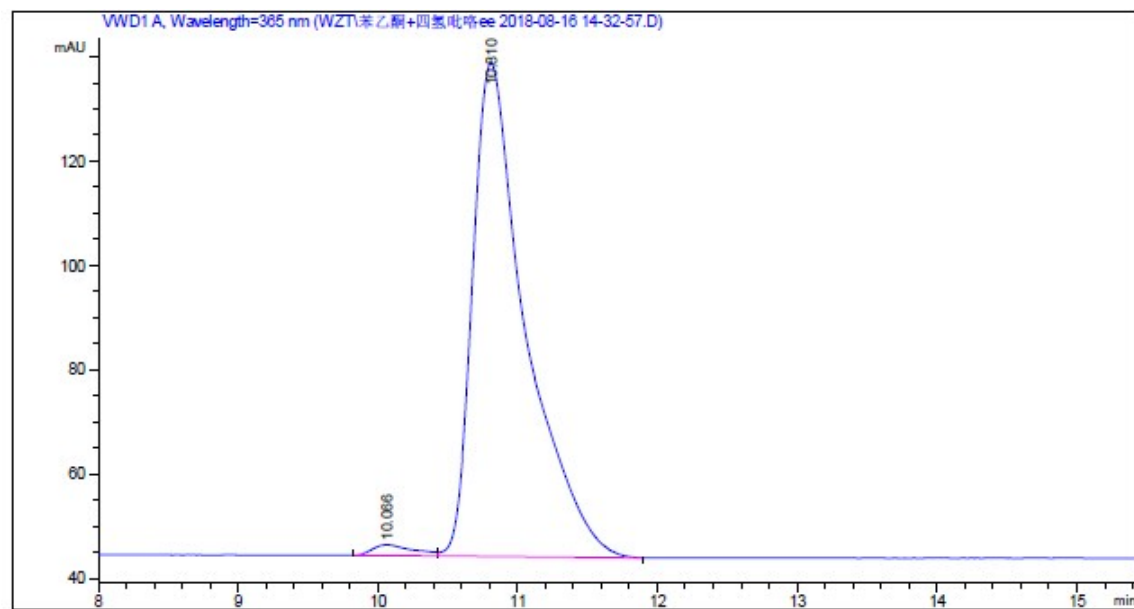

**1-(1-(p-tolyl)ethyl)pyrrolidine (3b):**<sup>3</sup> 88% yield, 94% ee, brown oil. <sup>1</sup>H NMR (500 MHz, CDCl<sub>3</sub>): δ 7.28 (d, *J* = 8.0 Hz, 2H, Ar-CH), 7.16 (d, *J* = 7.9 Hz, 2H, Ar-CH), 3.21 (q, *J* = 6.6 Hz, 1H, CH), 2.60 (m, 2H, CH<sub>2</sub>), 2.42 (m, 2H, N-CH<sub>2</sub>), 2.38 (s, 3H, N-CH<sub>3</sub>), 1.80 (m, 4H, 2\* CH<sub>2</sub>), 1.44 (d, *J* = 6.6 Hz, 3H, CH<sub>3</sub>); <sup>13</sup>C NMR (125 MHz, CDCl<sub>3</sub>): δ 141.1, 136.9, 129.1, 127.3, 65.8, 52.9, 23.4, 22.7, 21.1. Enantiomeric excess was determined by chiral HPLC: Chiralpak OJ-H column, Hex/IPA=99:1, 1 mL/min, 220nm, 4.48 min, 5.67 min.

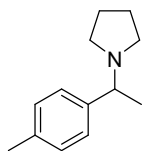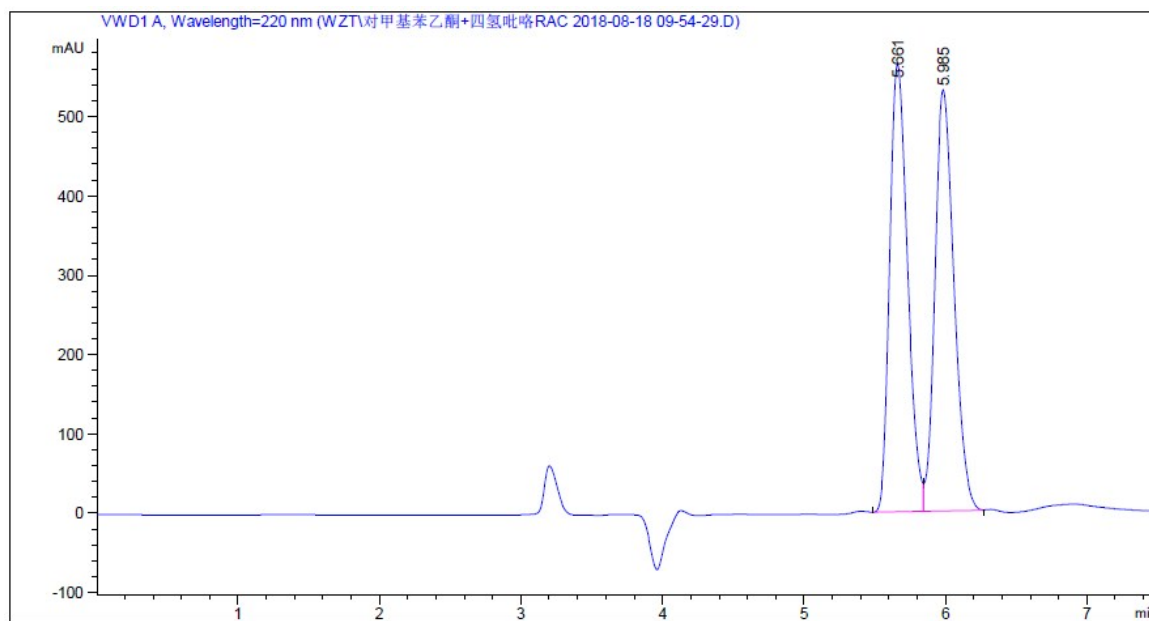

| # | [min]    | [min]  | [mAU*s]    | [mAU]     | %       |
|---|----------|--------|------------|-----------|---------|
| 1 | 5.661 BV | 0.1359 | 4929.40723 | 564.19318 | 49.7128 |
| 2 | 5.985 VB | 0.1437 | 4986.35449 | 530.23346 | 50.2872 |

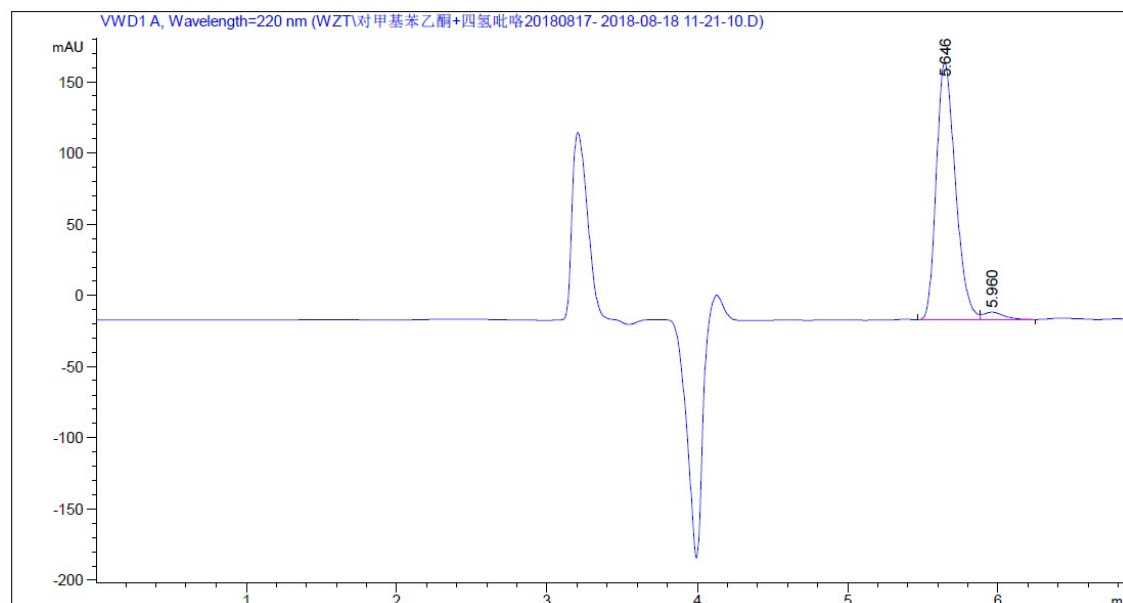

| # | [min]    | [min]  | [mAU*s]    | [mAU]     | %       |
|---|----------|--------|------------|-----------|---------|
| 1 | 5.646 BV | 0.1372 | 1593.33813 | 180.18692 | 97.0540 |
| 2 | 5.960 VB | 0.1387 | 48.36533   | 5.19286   | 2.9460  |

**1-(1-(4-methoxyphenyl)ethyl)pyrrolidine (3c):** 93% yield, 95% ee, brown oil.  $^1\text{H}$  NMR (500 MHz,  $\text{CDCl}_3$ ):  $\delta$  7.28 (d,  $J = 8.7$  Hz, 2H, Ar-CH), 6.88 (d,  $J = 8.7$  Hz, 2H, Ar-CH), 3.84 (s, 3H, O- $\text{CH}_3$ ), 3.18 (q,  $J = 7.6$  Hz, 1H, CH), 2.58 (m, 2H, N- $\text{CH}_2$ ), 2.39 (m, 2H, N- $\text{CH}_2$ ), 1.79 (m, 4H, 2\* $\text{CH}_2$ ), 1.42 (d,  $J = 7.6$  Hz, 3H,  $\text{CH}_3$ );  $^{13}\text{C}$  NMR (125 MHz,  $\text{CDCl}_3$ ):  $\delta$  159.2 (Ar-CO), 132.1 (Ar-CC), 128.7, 113.8, 65.2, 55.0, 52.3, 23.0; 20.9. Enantiomeric excess was determined by  $^1\text{H}$  NMR using (*S*)-2-acetoxy-2-phenylacetic acid as chemical shift reagent.

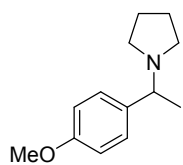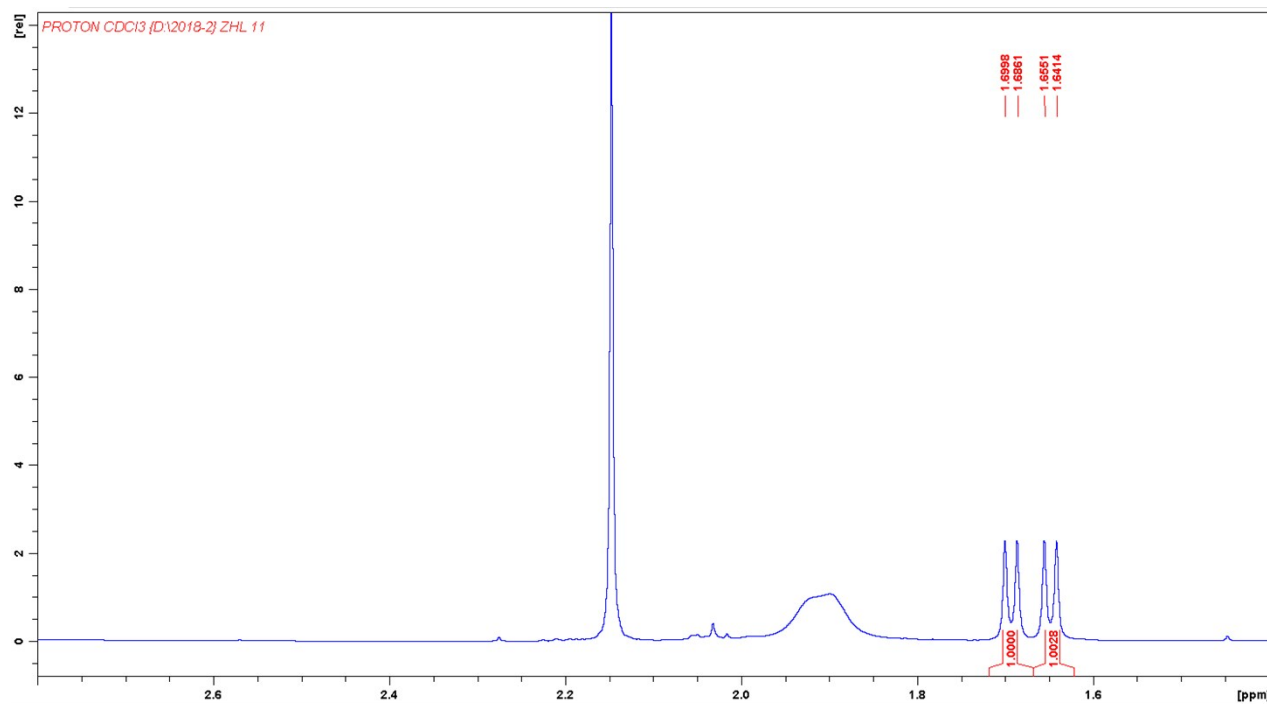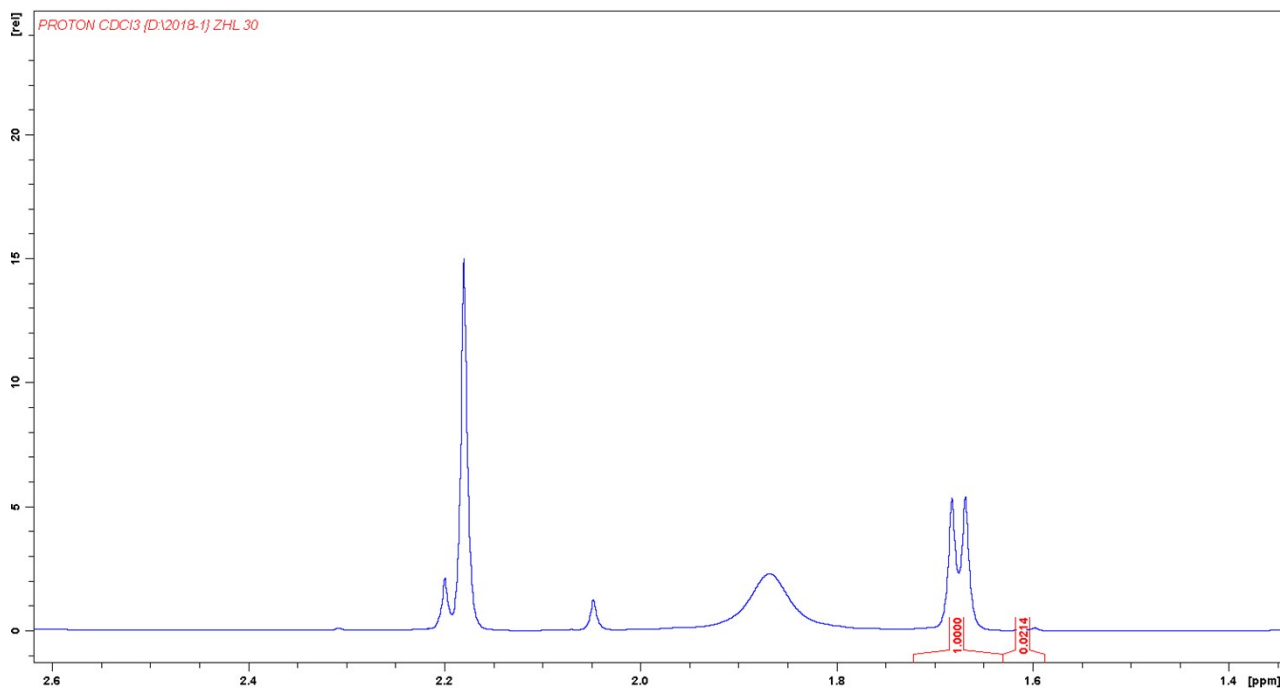

**1-(1-(4-fluorophenyl)ethyl)pyrrolidine (3d):**<sup>3</sup> 90% yield, 96% ee, brown oil. <sup>1</sup>H NMR (500 MHz, CDCl<sub>3</sub>): δ 7.33 (m, 2H, Ar-CH), 7.02 (m, 2H, Ar-CH), 3.21 (q, *J* = 6.6 Hz, 1H, CH), 2.57 (m, 2H, N-CH<sub>2</sub>), 2.39 (m, 2H, N-CH<sub>2</sub>), 1.80 (m, 4H, 2\*CH<sub>2</sub>), 1.41 (d, *J* = 6.6 Hz, 3H, CH<sub>3</sub>); <sup>13</sup>C NMR (125 MHz, CDCl<sub>3</sub>): δ 162.9 (Ar-CF), 160.9 (Ar-CC), 128.8, 128.7, 115.2, 115.0, 65.3, 52.9, 23.4, 23.0. Enantiomeric excess was determined by chiral HPLC: Chiralpak OJ-3 column, Hex/IPA=98:2, 0.6 mL/min, 220 nm, 6.48 min, 6.80 min.

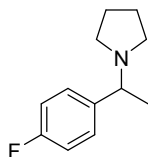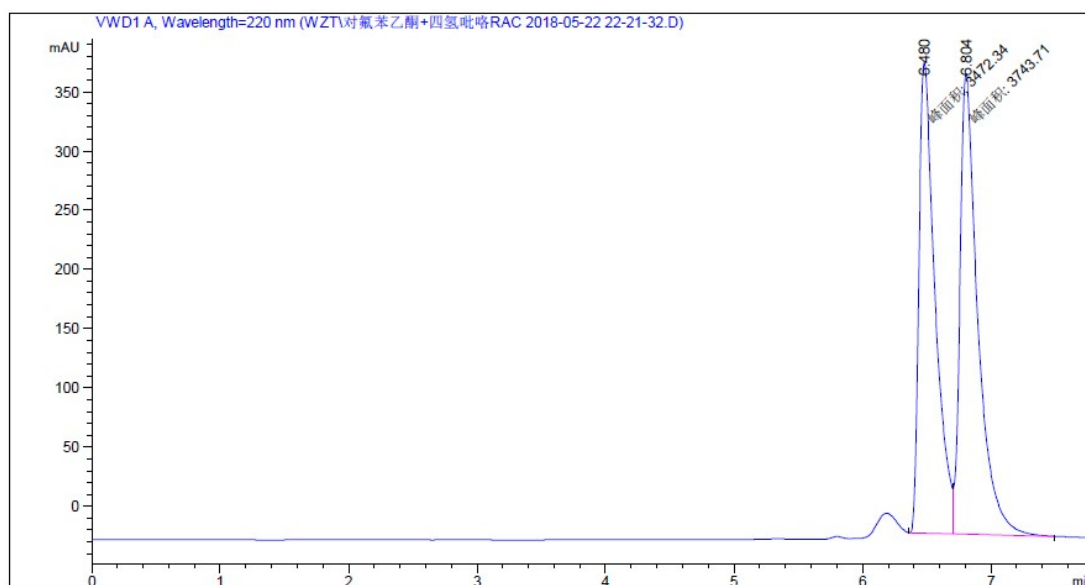

| # | [min] | [min] | [mAU*s]           | [mAU]     | %       |
|---|-------|-------|-------------------|-----------|---------|
| 1 | 6.480 | MF    | 0.1456 3472.33618 | 397.57898 | 48.1196 |
| 2 | 6.804 | FM    | 0.1603 3743.71265 | 389.23788 | 51.8804 |

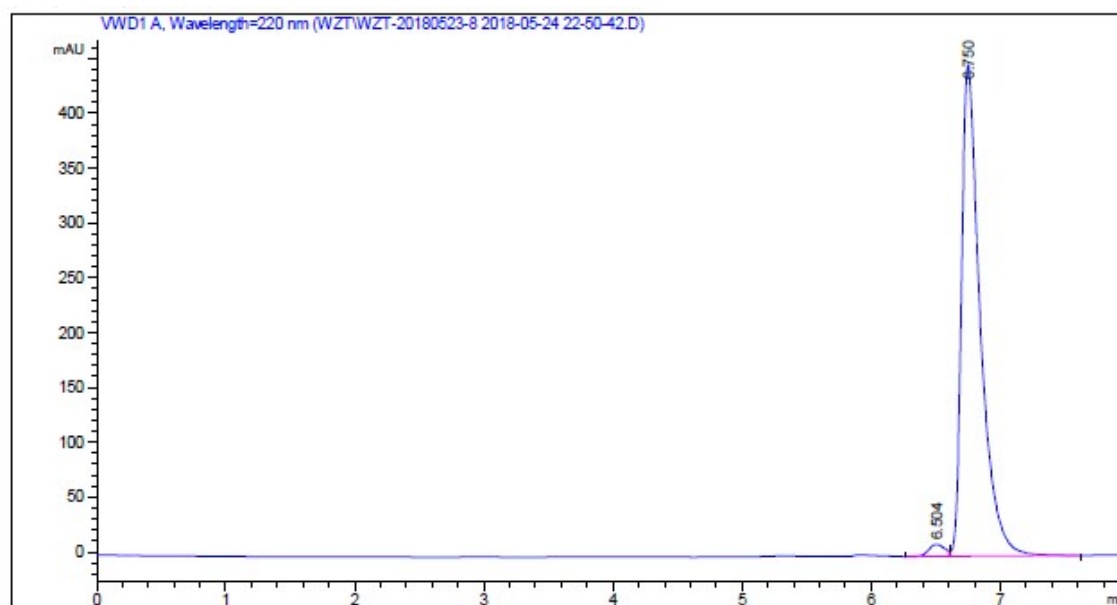

| # | [min] | [min] | [mAU*s]           | [mAU]     | %       |
|---|-------|-------|-------------------|-----------|---------|
| 1 | 6.504 | BV    | 0.1360 95.05695   | 10.87021  | 2.0645  |
| 2 | 6.750 | VB    | 0.1485 4509.29932 | 447.84070 | 97.9355 |

**1-(1-(4-chlorophenyl)ethyl)pyrrolidine (3e):** <sup>2</sup> 91% yield, 93% ee, brown oil. <sup>1</sup>H NMR (500 MHz, CDCl<sub>3</sub>): δ 7.31 (s, 4H, Ar-CH), 3.21 (q, *J* = 6.5 Hz, 1H, CH), 2.57 (m, 2H, N-CH<sub>2</sub>), 2.40 (m, 2H, N-CH<sub>2</sub>), 1.80 (m, 4H, 2\*CH<sub>2</sub>), 1.42 (d, *J* = 6.6 Hz, 3H, CH<sub>3</sub>); <sup>13</sup>C NMR (125 MHz, CDCl<sub>3</sub>): δ 143.3 (Ar-CCl), 132.7 (Ar-C), 128.7, 128.6, 65.4, 52.9, 23.4, 22.9. Enantiomeric excess was determined by <sup>1</sup>H NMR using (*R*)-2-acetoxy-2-phenylacetic acid as chemical shift reagent.

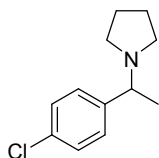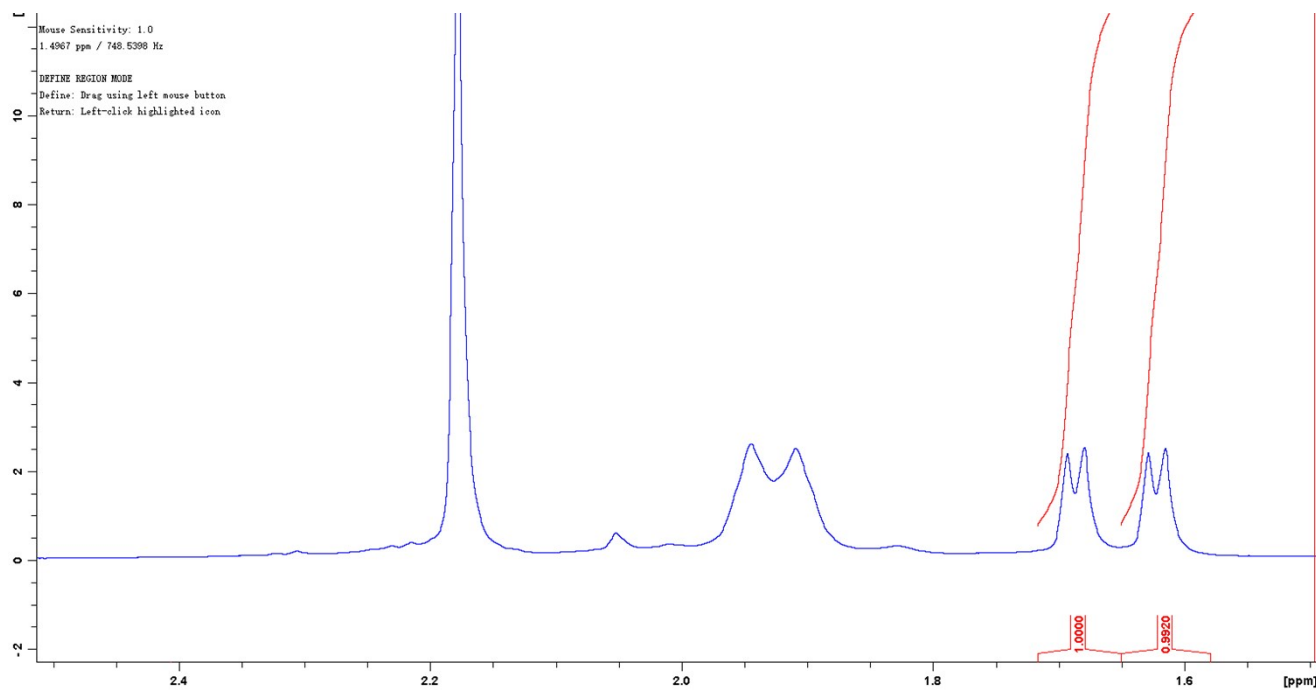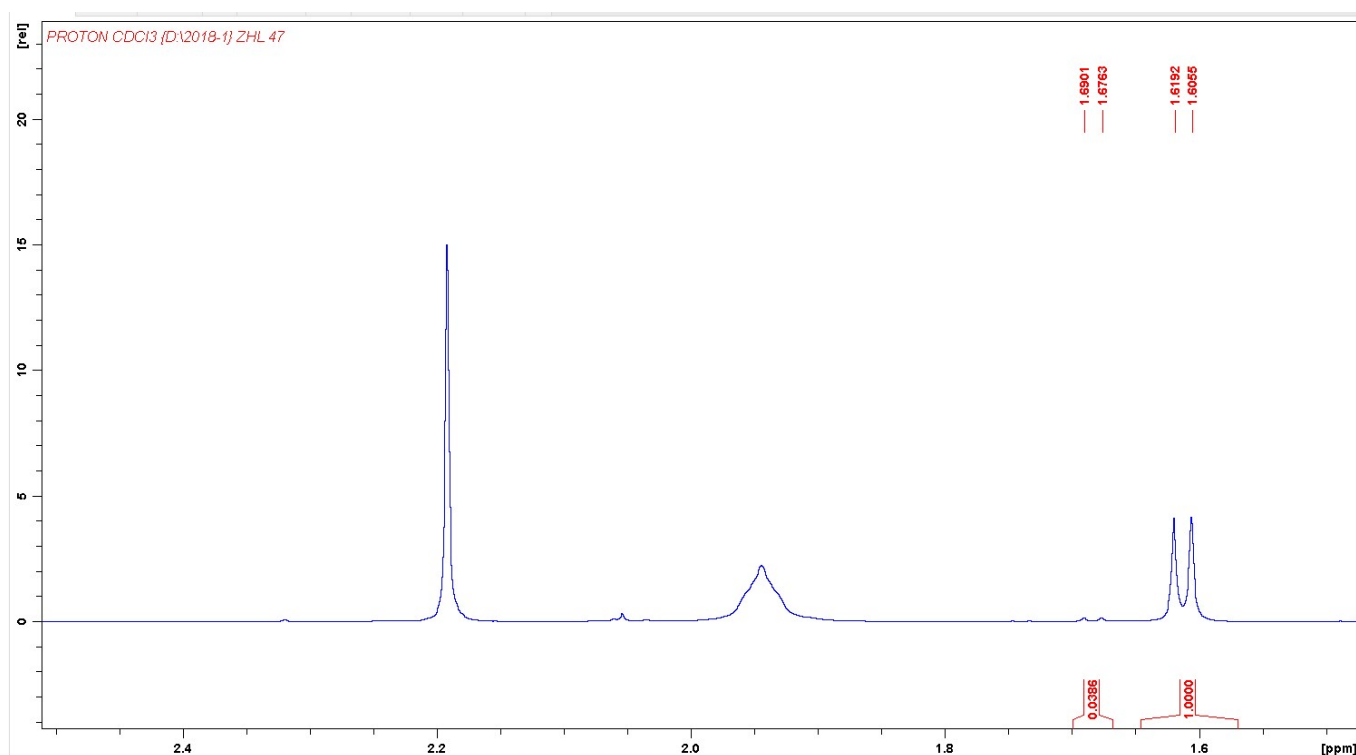

**1-(1-(4-bromophenyl)ethyl)pyrrolidine (3f):**<sup>4</sup> 84% yield, 92% ee, brown oil. <sup>1</sup>H NMR (500 MHz, CDCl<sub>3</sub>): δ 7.45 (d, *J* = 7.9 Hz, 2H, Ar-CH), 7.25 (d, *J* = 7.8 Hz, 2H, Ar-CH), 3.18 (q, *J* = 6.2 Hz, 1H, CH), 2.55 (m, 2H, N-CH<sub>2</sub>), 2.39 (m, 2H, N-CH<sub>2</sub>), 1.79 (m, 4H, 2\*CH<sub>2</sub>), 1.40 (d, *J* = 6.3 Hz, 3H, CH<sub>3</sub>); <sup>13</sup>C NMR (125 MHz, CDCl<sub>3</sub>): δ 144.5, 131.4, 129.0, 120.5, 65.4, 52.9, 23.4, 23.1. Enantiomeric excess was determined by <sup>1</sup>H NMR using (*R*)-2-acetoxy-2-phenylacetic acid as chemical shift reagent.

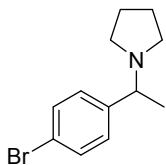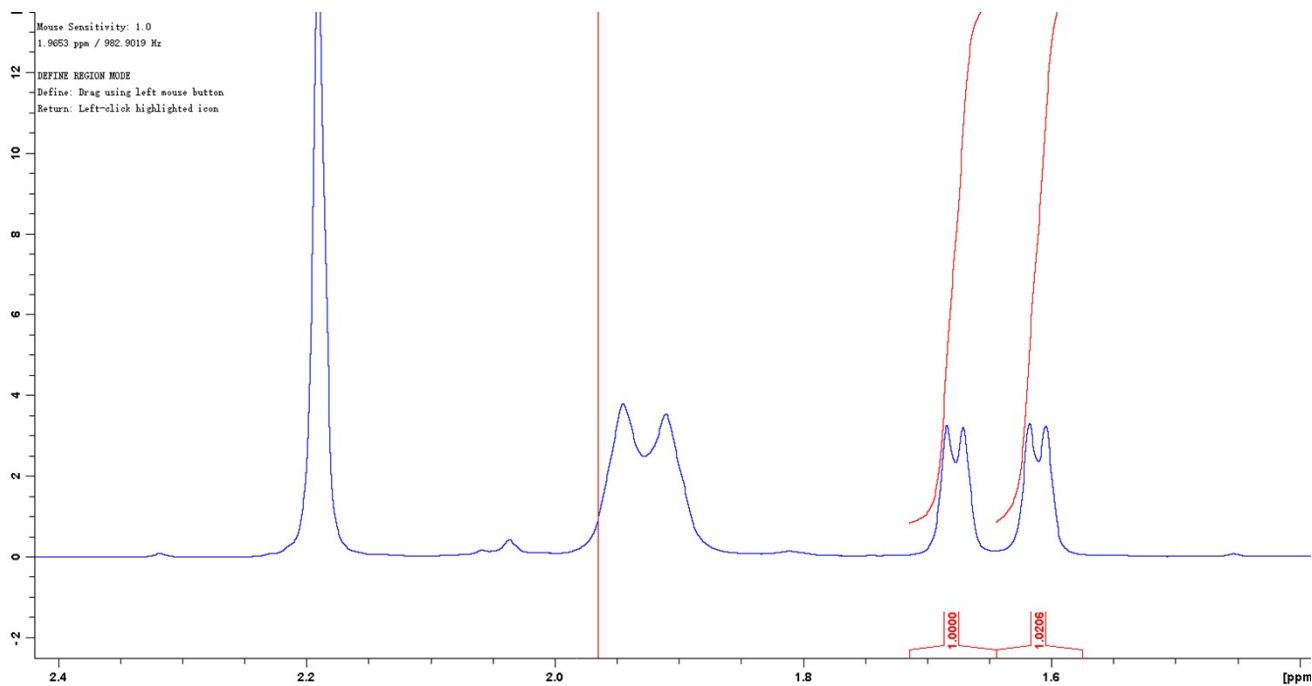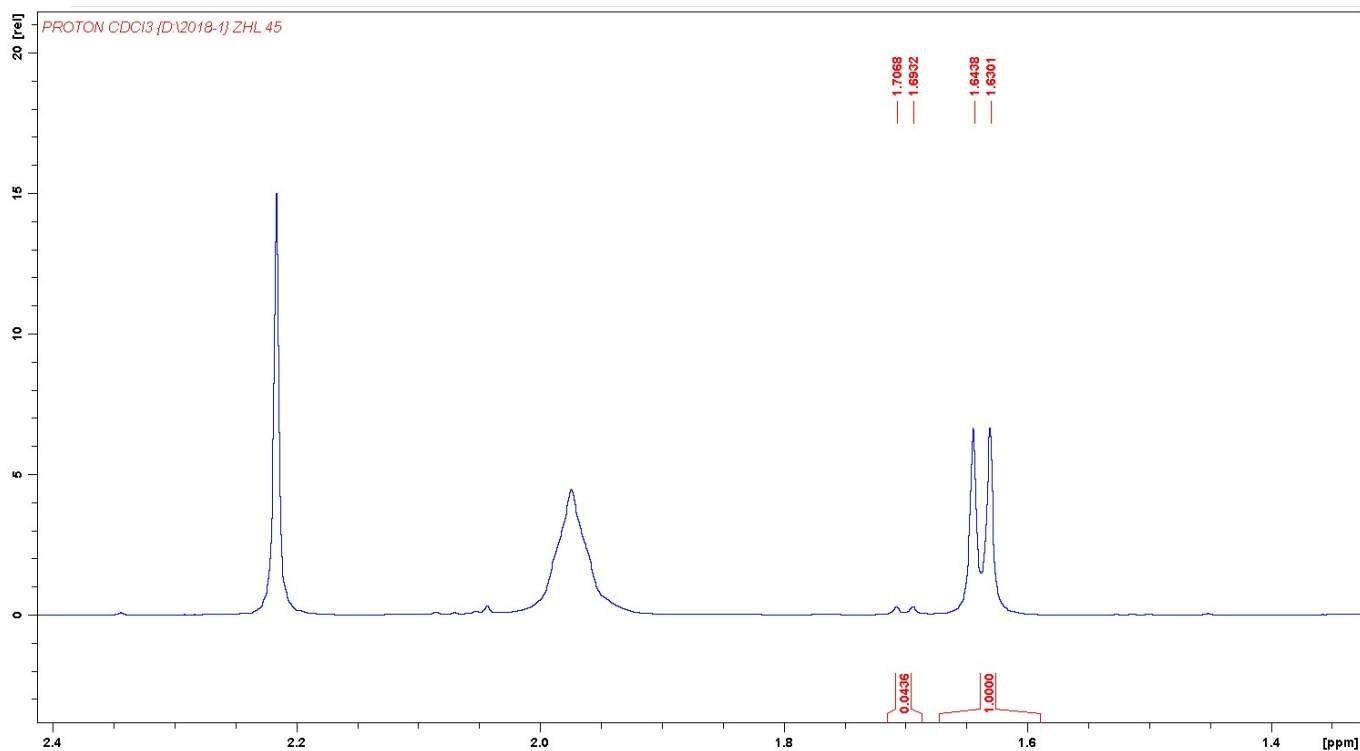



**1-(1-([1,1'-biphenyl]-4-yl)ethyl)pyrrolidine (3g):** 94% yield, 92% ee, brown oil, unknown compound.  $^1\text{H}$  NMR (500 MHz,  $\text{CDCl}_3$ ):  $\delta$  7.65 (d,  $J = 7.3$  Hz, 2H, Ar-CH), 7.59 (d,  $J = 8.1$  Hz, 2H, Ar-CH), 7.47 (m, 4H, Ar-CH), 7.38 (m, 1H, Ar-CH), 3.28 (q,  $J = 6.5$  Hz, 1H, CH), 2.63 (m, 2H, N- $\text{CH}_2$ ), 2.47 (m, 2H, N- $\text{CH}_2$ ), 1.83 (m, 4H, 2\* $\text{CH}_2$ ), 1.49 (d,  $J = 6.6$  Hz, 3H,  $\text{CH}_3$ );  $^{13}\text{C}$  NMR (125 MHz,  $\text{CDCl}_3$ ):  $\delta$  141.7, 140.2, 128.8, 128.5, 127.8, 127.7, 127.5, 66.1, 52.9, 23.4, 20.7. HRMS calcd for  $\text{C}_{18}\text{H}_{22}\text{N}$   $[\text{M}+\text{H}]^+$ : 252.1674, found: 252.1733. Enantiomeric excess was determined by  $^1\text{H}$  NMR using (*S*)-2-acetoxy-2-phenylacetic acid as chemical shift reagent.

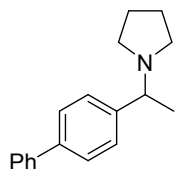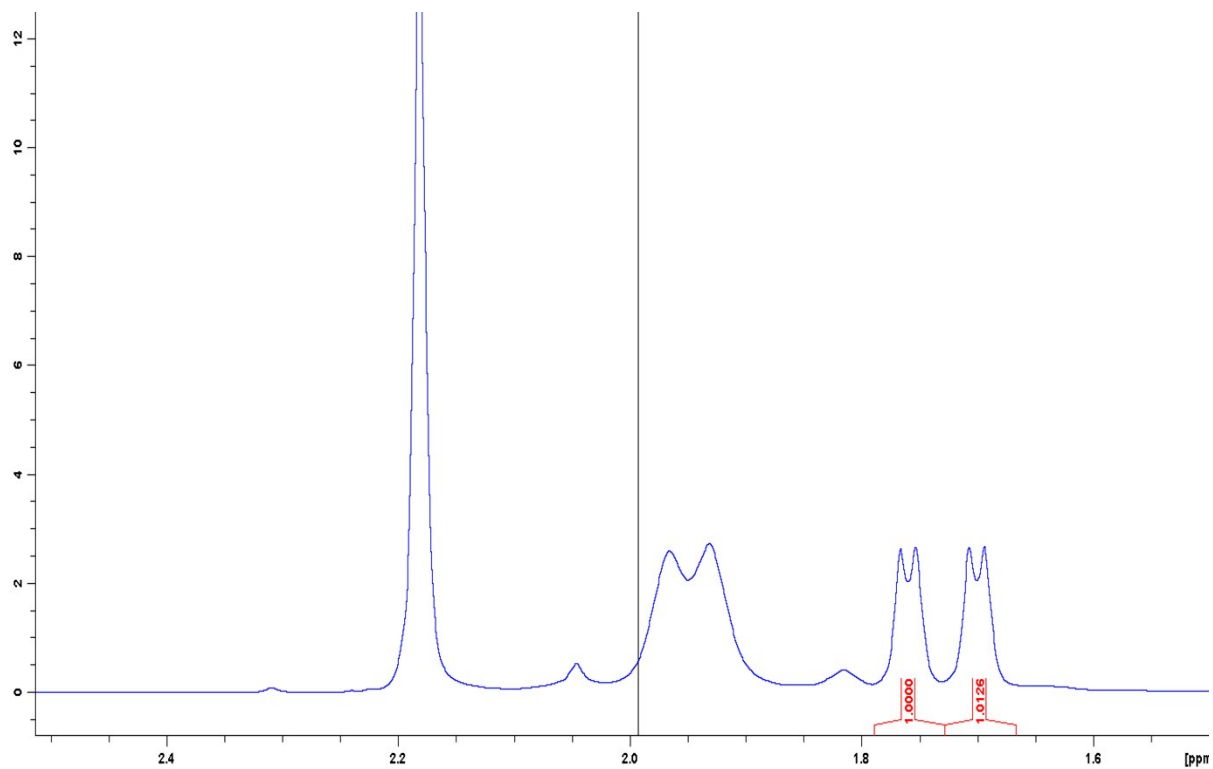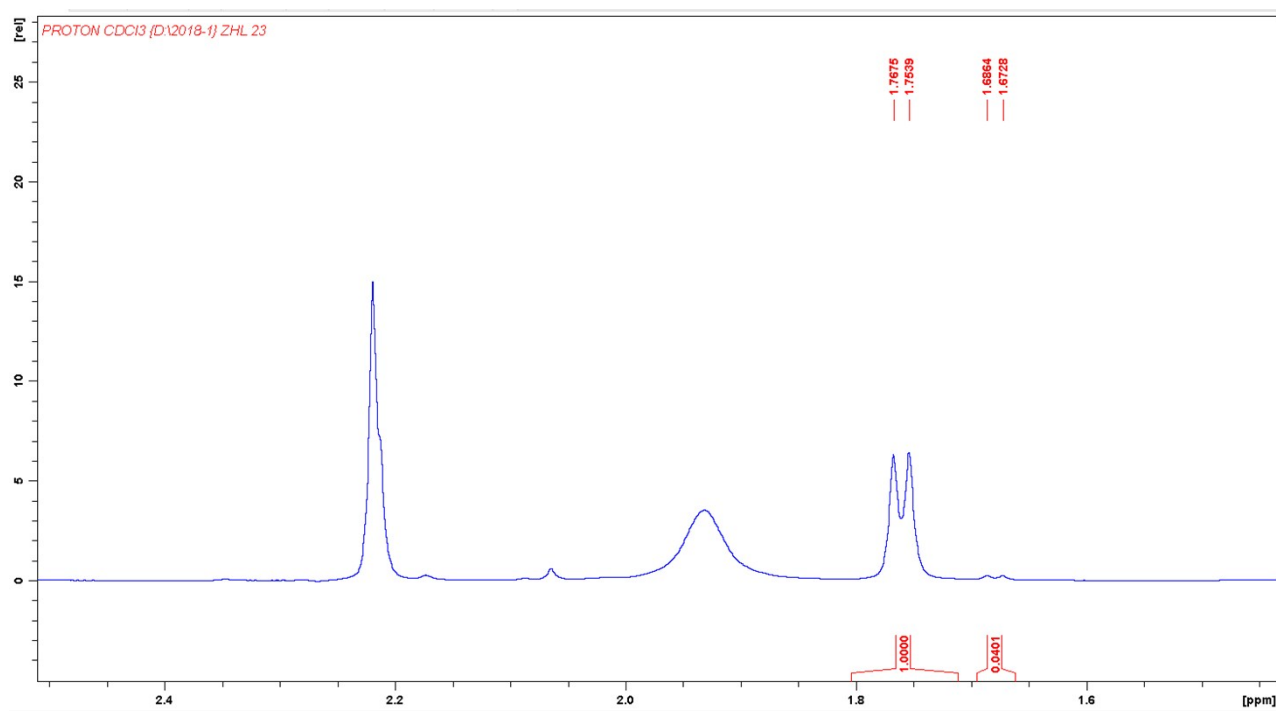

**1-(1-(4-nitrophenyl)ethyl)pyrrolidine (3h):**<sup>5</sup> 90% yield, 90% ee, brown oil. <sup>1</sup>H NMR (500 MHz, CDCl<sub>3</sub>): δ 8.20 (d, *J* = 8.7 Hz, 2H, Ar-CH), 7.55 (d, *J* = 8.6 Hz, 2H, Ar-CH), 3.34 (q, *J* = 6.6 Hz, 1H, CH), 2.57 (m, 2H, N-CH<sub>2</sub>), 2.41 (m, 2H, N-CH<sub>2</sub>), 1.81 (m, 4H, 2\*CH<sub>2</sub>), 1.42 (d, *J* = 6.6 Hz, 3H, CH<sub>3</sub>); <sup>13</sup>C NMR (125 MHz, CDCl<sub>3</sub>): δ 153.7, 146.9, 127.9, 123.7, 65.4, 52.9, 23.4, 23.3. Enantiomeric excess was determined by <sup>1</sup>H NMR using (*R*)-2-acetoxy-2-phenylacetic acid as chemical shift reagent.

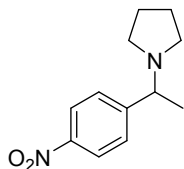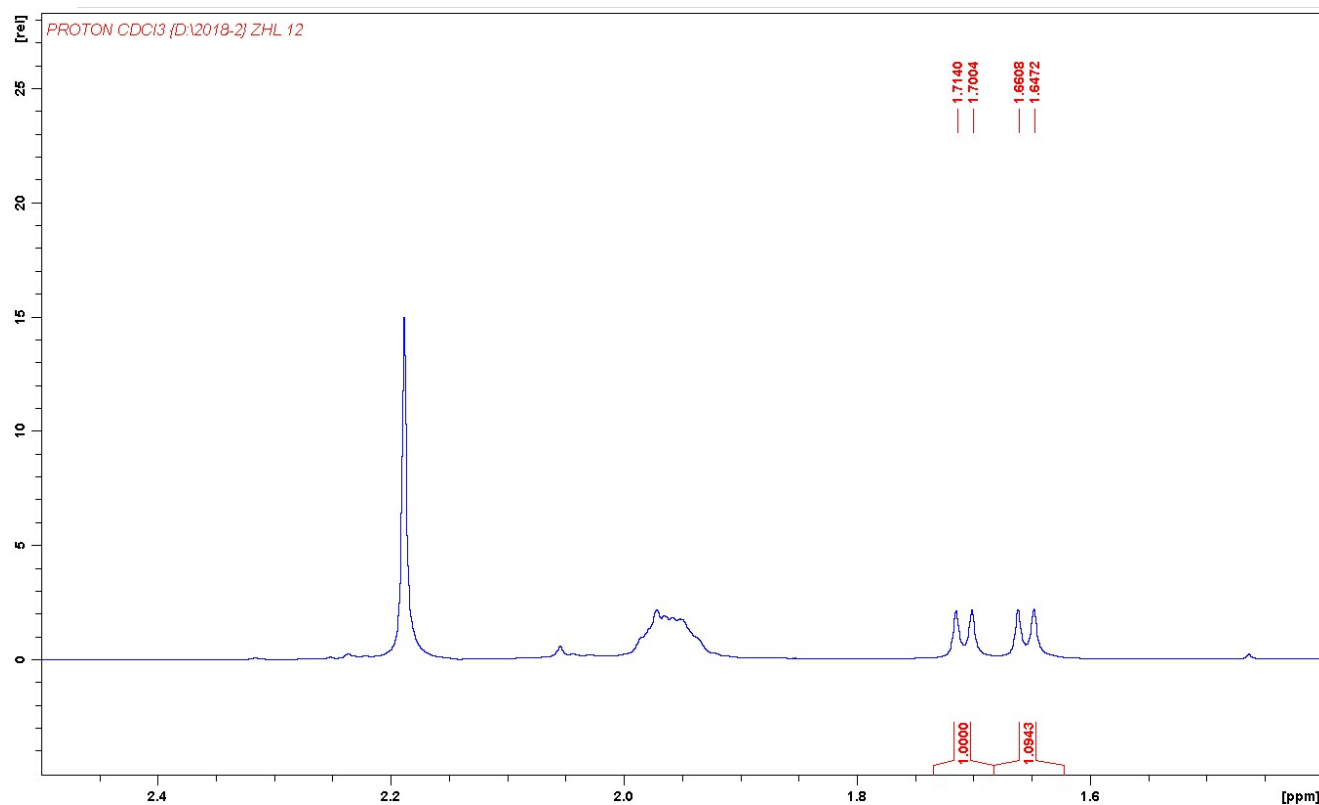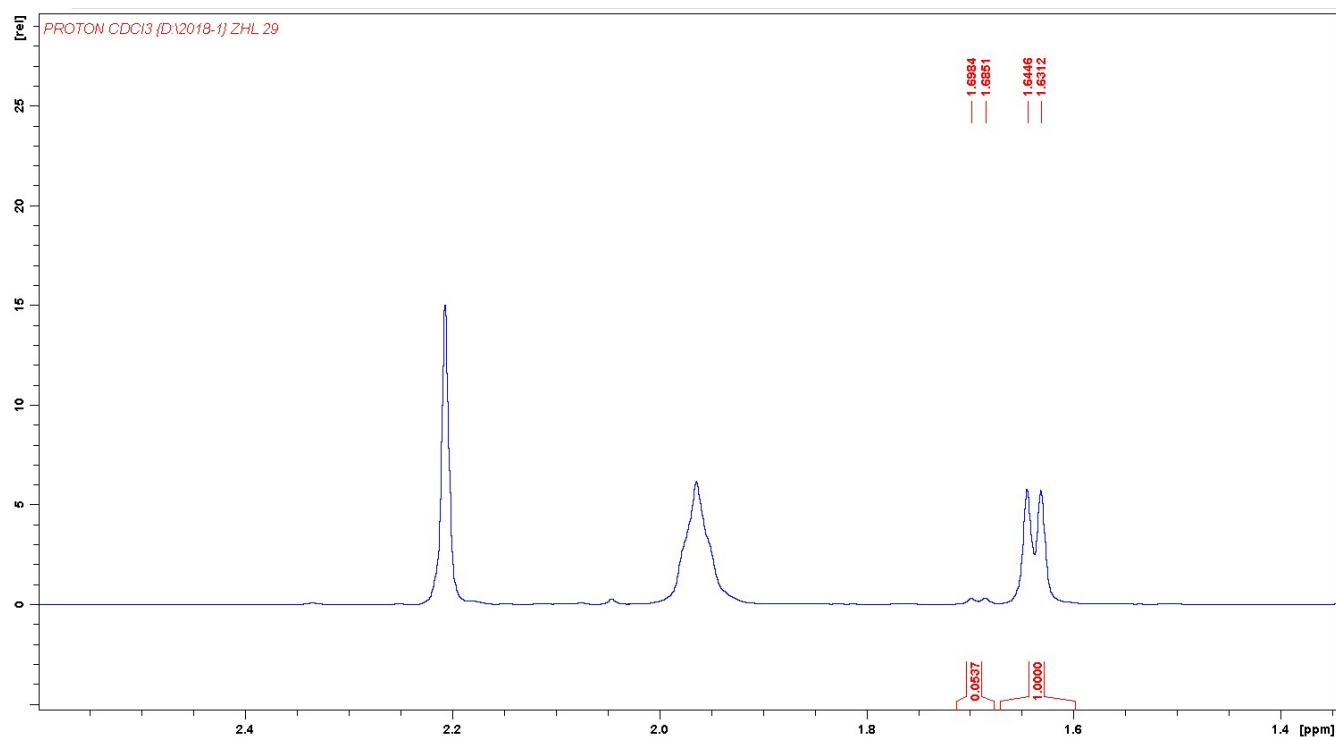

**1-(1-(4-trifluoromethylphenyl)ethyl)pyrrolidine (3i)**:<sup>5</sup> 94% yield, 90% ee, brown oil. <sup>1</sup>H NMR (500 MHz, CDCl<sub>3</sub>): δ 7.59 (d, *J* = 8.1 Hz, 2H, Ar-CH), 7.49 (d, *J* = 8.1 Hz, 2H, Ar-CH), 3.28 (q, *J* = 6.6 Hz, 1H, CH), 2.58 (m, 2H, N-CH<sub>2</sub>), 2.40 (m, 2H, N-CH<sub>2</sub>), 1.80 (m, 4H, 2\*CH<sub>2</sub>), 1.42 (d, *J* = 7.1 Hz, 3H, CH<sub>3</sub>); <sup>13</sup>C NMR (125 MHz, CDCl<sub>3</sub>): δ 150.0, 129.2, 127.5, 125.3, 125.2, 123.2, 66.3, 53.0, 23.4, 22.3, 21.5. Enantiomeric excess was determined by <sup>1</sup>H NMR using (*R*)-2-acetoxy-2-phenylacetic acid as chemical shift reagent.

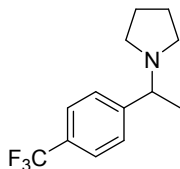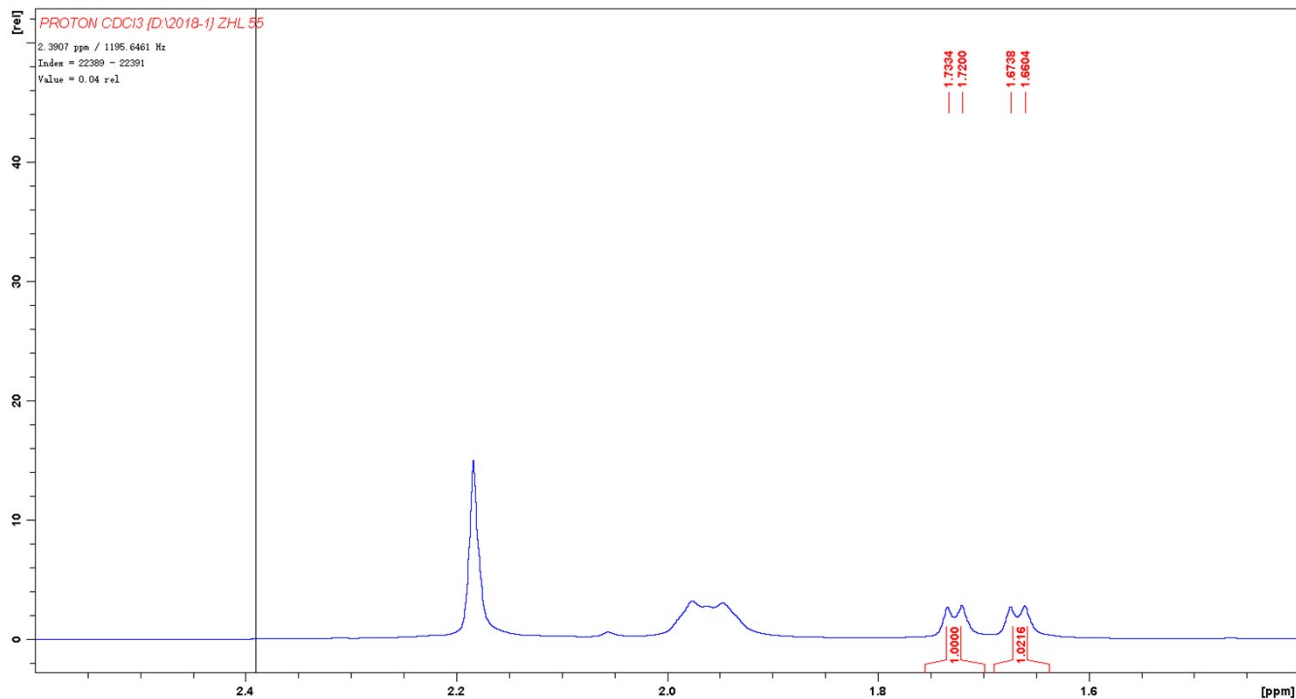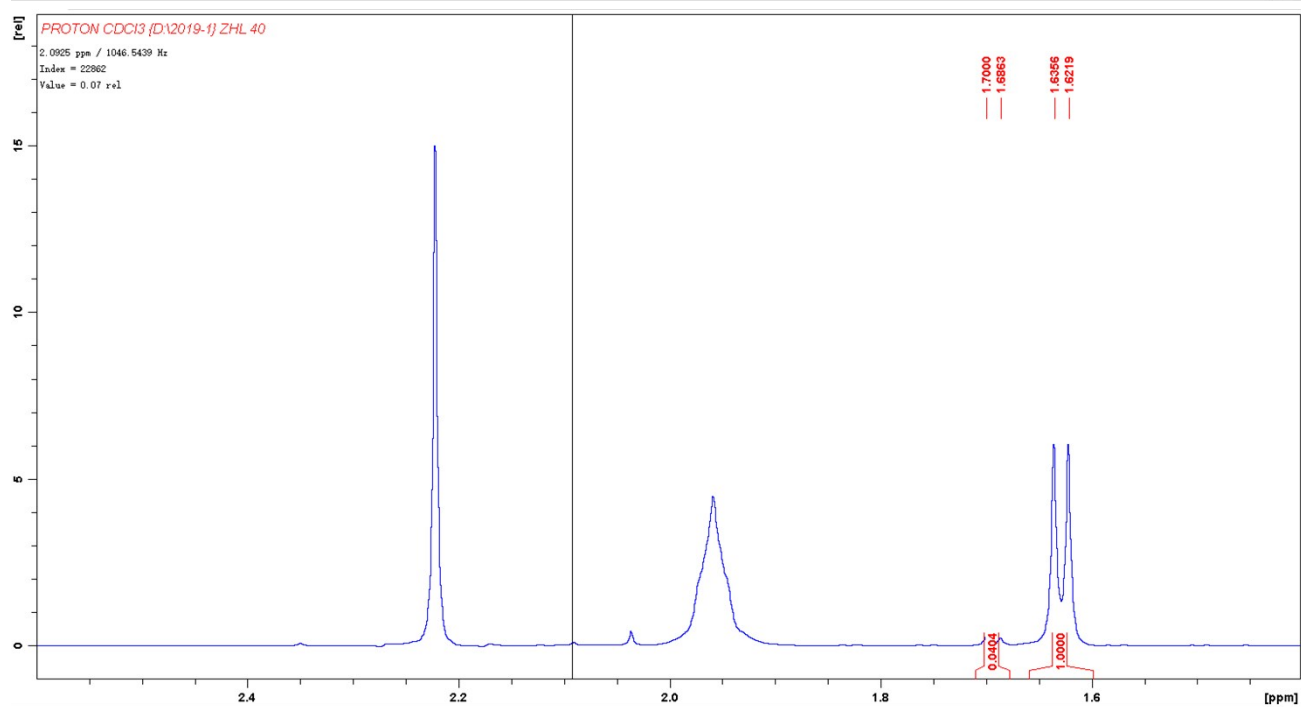

**1-(1-(*m*-tolyl)ethyl)pyrrolidine (3j):**<sup>3</sup> 86% yield, 96% ee, brown oil. <sup>1</sup>H NMR (500 MHz, CDCl<sub>3</sub>): δ 7.24 (m, 3H, Ar-CH), 7.11 (m, 1H, Ar-CH), 3.33 (m, 1H, CH), 2.71 (m, 2H, N-CH<sub>2</sub>), 2.54 (m, 2H, N-CH<sub>2</sub>), 2.38 (s, 3H, Ar-CH<sub>3</sub>), 1.86 (m, 4H, 2\*CH<sub>2</sub>), 1.52 (d, *J* = 6.0 Hz, 3H, CH<sub>3</sub>); <sup>13</sup>C NMR (125 MHz, CDCl<sub>3</sub>): δ 143.3, 138.2, 128.4, 128.3, 128.1, 124.6, 65.6, 52.9, 23.4, 23.3. Enantiomeric excess was determined by <sup>1</sup>H NMR using (*R*)-2-acetoxy-2-phenylacetic acid as chemical shift reagent.

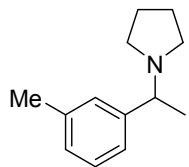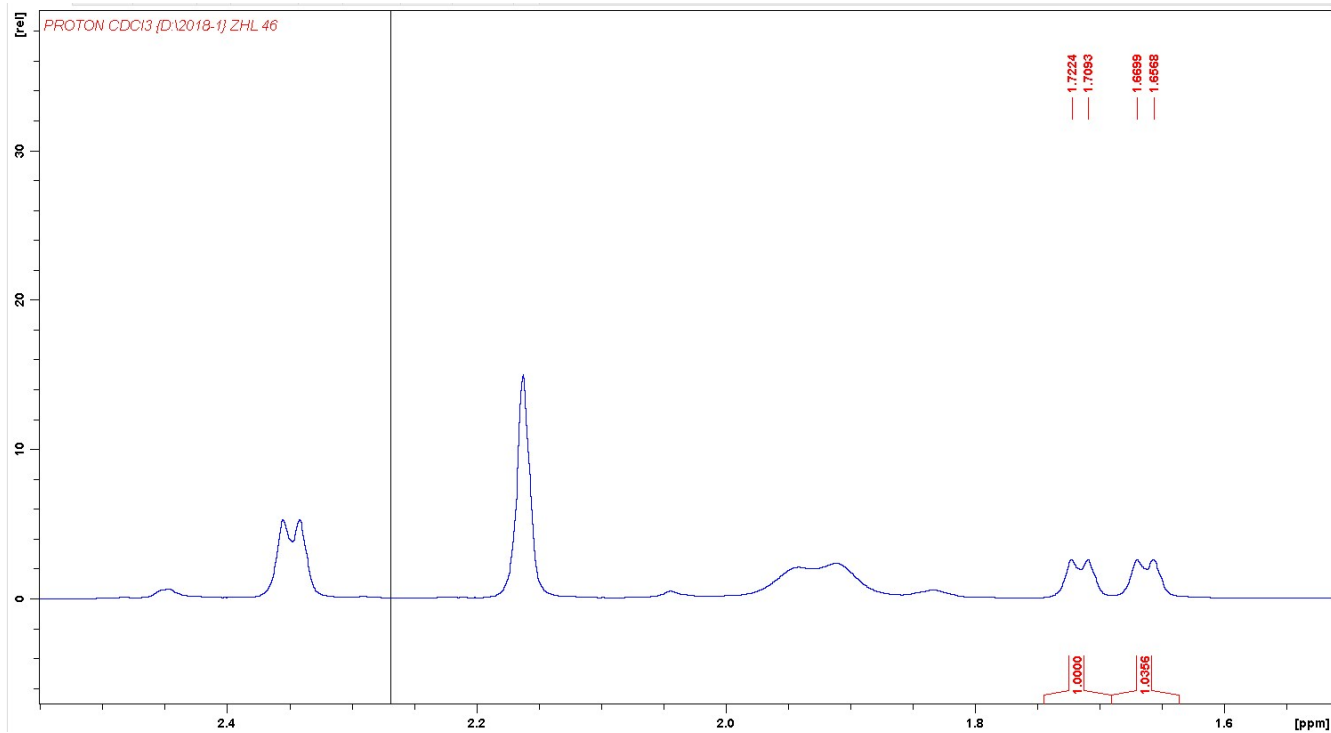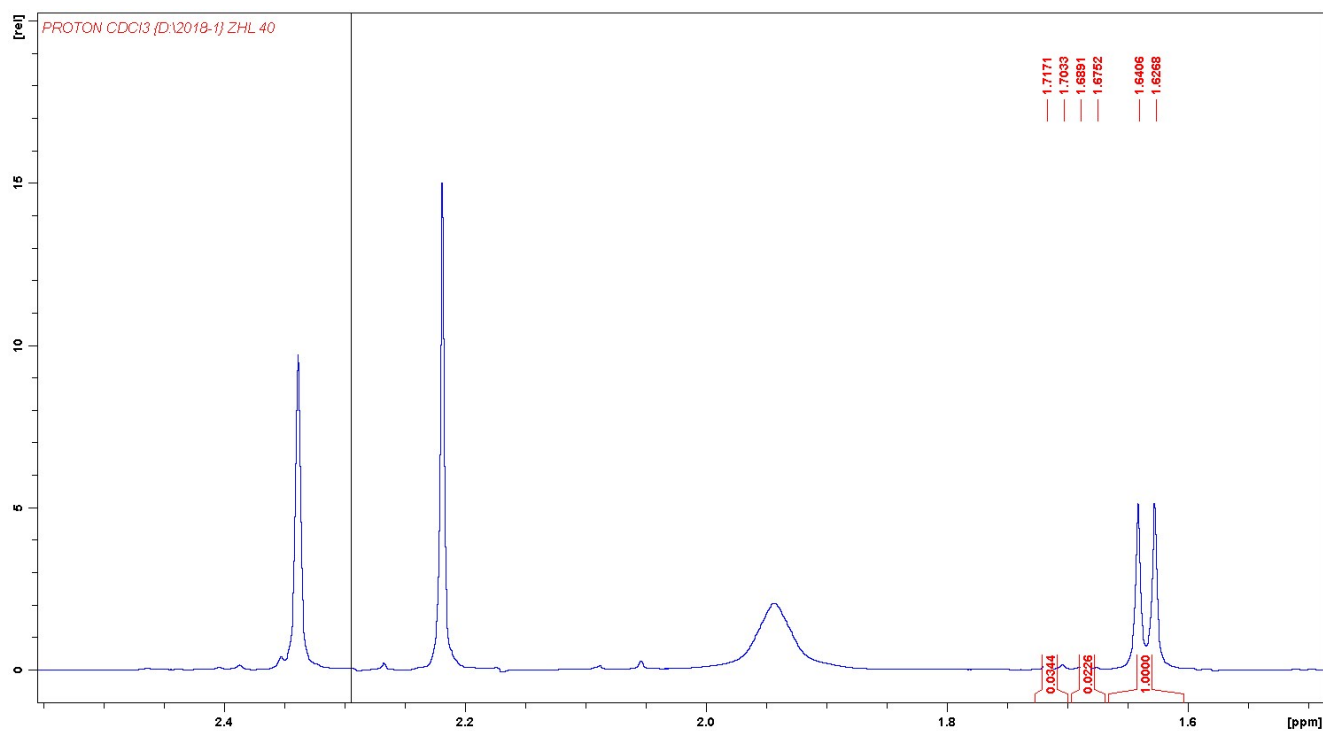

**1-(1-(3-methoxyphenyl)ethyl)pyrrolidine (3k):**<sup>3</sup> 92% yield, 93% ee, brown oil. <sup>1</sup>H NMR (500 MHz, CDCl<sub>3</sub>): δ 7.25 (m, 1H, Ar-CH), 6.96 (m, 2H, Ar-CH), 6.82 (m, 1H, Ar-CH), 3.84 (s, 3H, O-CH<sub>3</sub>), 3.20 (q, *J* = 6.6 Hz, 1H, CH), 2.60 (m, 2H, N-CH<sub>2</sub>), 2.42 (m, 2H, N-CH<sub>2</sub>), 1.80 (m, 4H, 2\*CH<sub>2</sub>), 1.44 (d, *J* = 6.6 Hz, 3H, CH<sub>3</sub>); <sup>13</sup>C NMR (125 MHz, CDCl<sub>3</sub>): δ 159.7, 147.5, 129.2, 119.7, 112.7, 112.3, 66.1, 55.3, 53.0, 23.5, 23.2. Enantiomeric excess was determined by <sup>1</sup>H NMR using (*R*)-2-acetoxy-2-phenylacetic acid as chemical shift reagent.

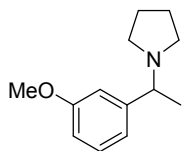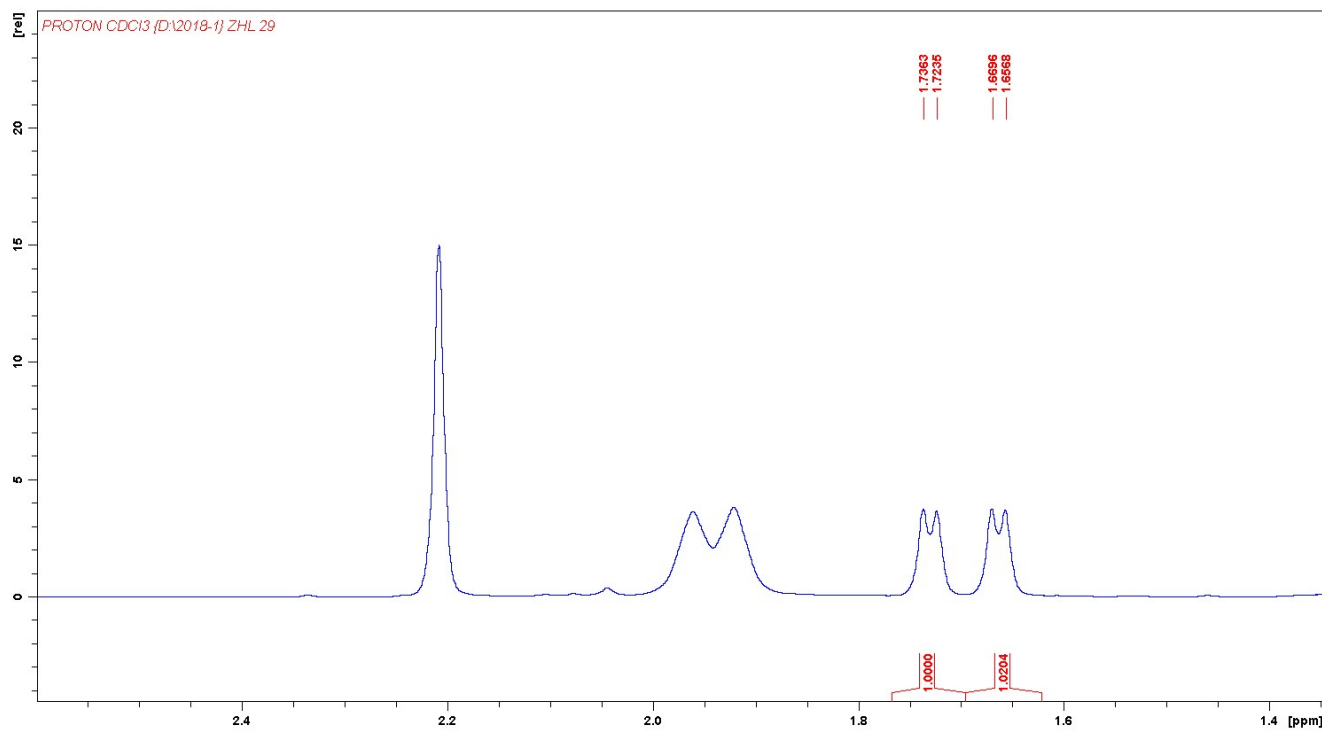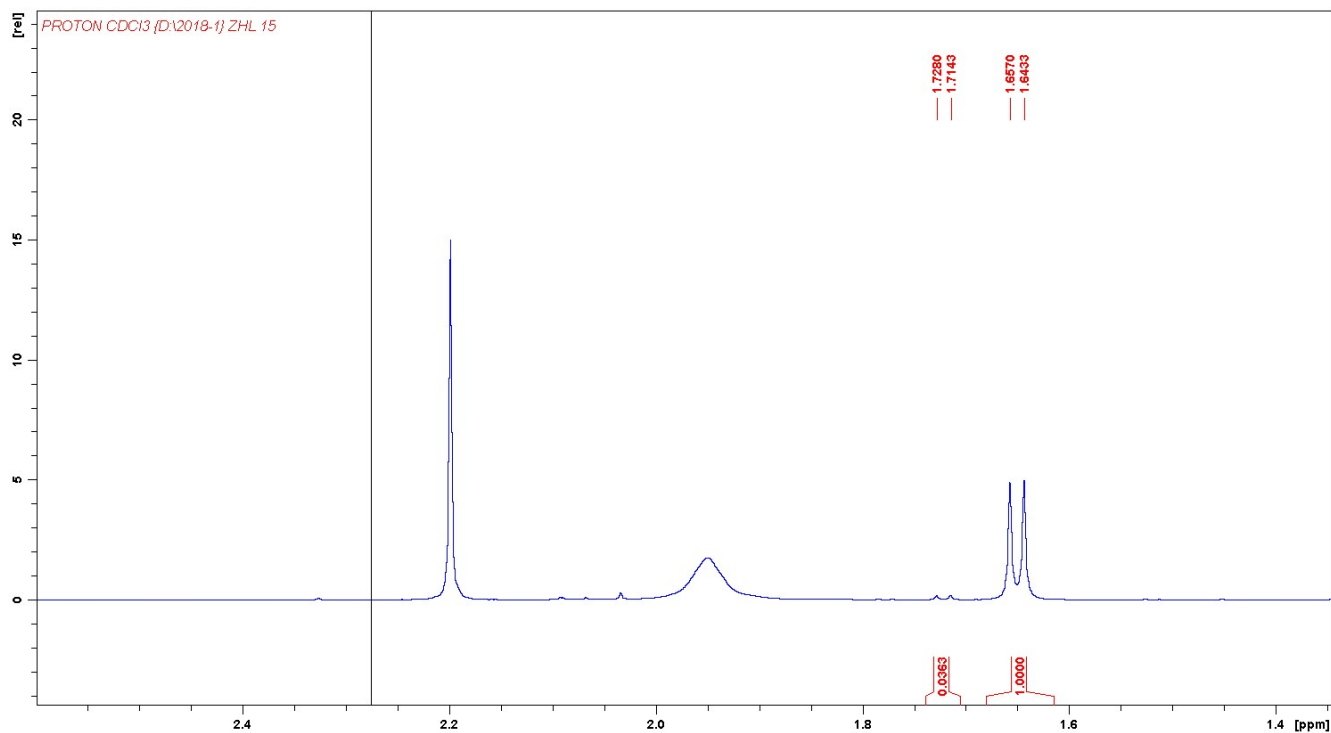

**1-(1-(3-chlorophenyl)ethyl)pyrrolidine (3I)**: 91% yield, 92% ee, brown oil, unknown compound.  $^1\text{H NMR}$  (500 MHz,  $\text{CDCl}_3$ ):

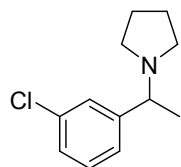

$\delta$  7.38 (m, 1H, Ar-CH), 7.20–7.30 (m, 3H, Ar-CH), 3.20 (q,  $J = 6.6$  Hz, 1H, CH), 2.58 (m, 2H, N- $\text{CH}_2$ ), 2.40 (m, 2H, N- $\text{CH}_2$ ), 1.80 (m, 4H, 2\* $\text{CH}_2$ ), 1.42 (d,  $J = 6.6$  Hz, 3H,  $\text{CH}_3$ );  $^{13}\text{C NMR}$  (125 MHz,  $\text{CDCl}_3$ ):  $\delta$  147.5 (Ar-CCl), 134.2, 129.7, 127.4, 127.1, 125.4, 65.6, 52.9, 23.4, 23.10. HRMS calcd for  $\text{C}_{12}\text{H}_{17}\text{ClN}$   $[\text{M}+\text{H}]^+$ : 210.10440, found 210.10426. Enantiomeric excess was determined by  $^1\text{H NMR}$  using (*R*)-2-acetoxy-2-phenylacetic acid as chemical shift reagent.

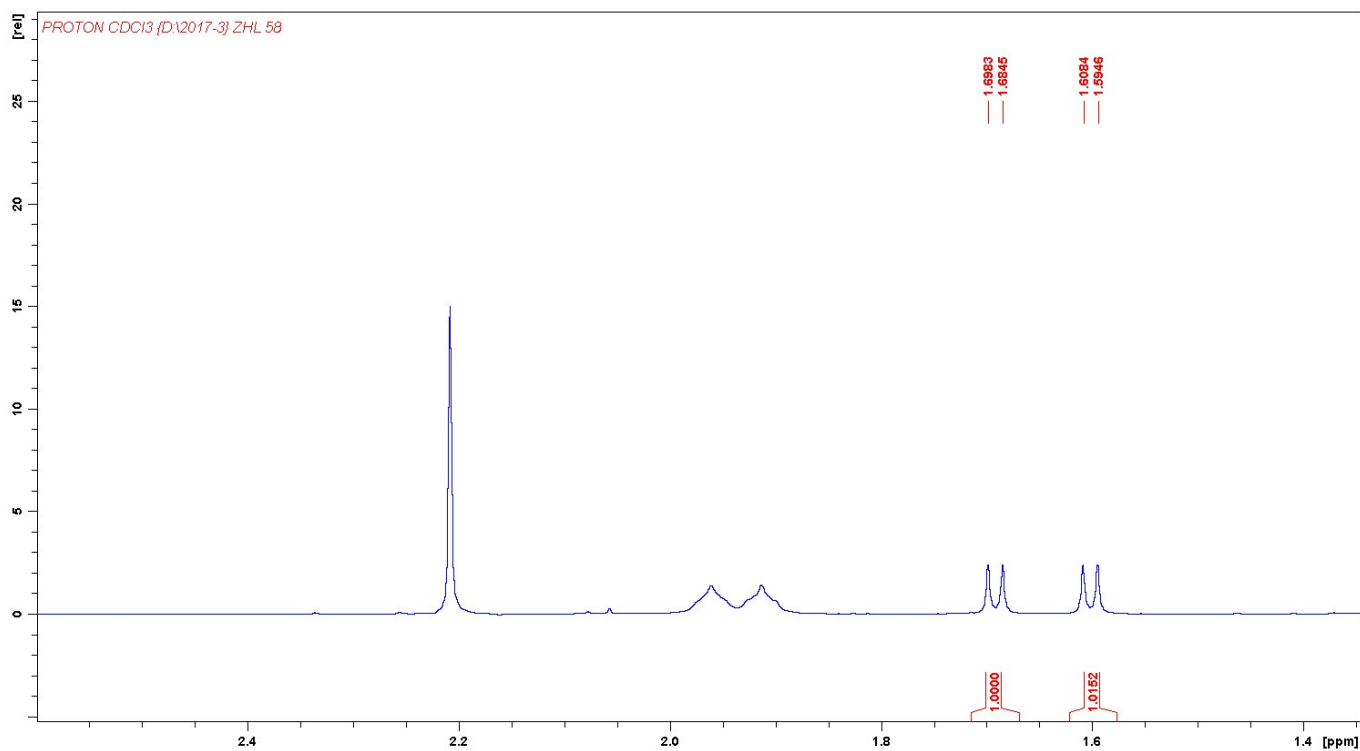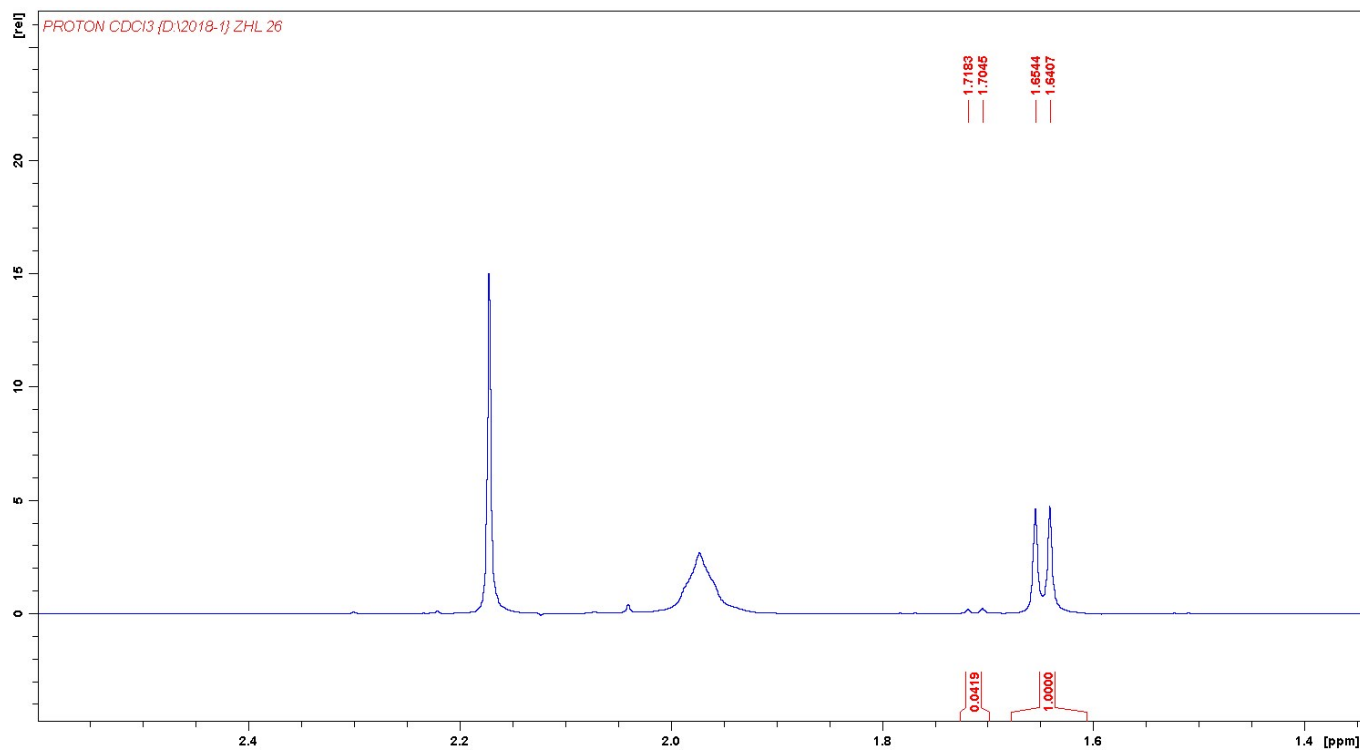

**1-(1-(3-bromophenyl)ethyl)pyrrolidine (3m)**: 89% yield, 92% ee, brown oil.  $^1\text{H}$  NMR (500 MHz,  $\text{CDCl}_3$ ):  $\delta$  7.54 (s, 1H, Ar-CH), 7.39 (d,  $J = 7.9$  Hz, 1H, Ar-CH), 7.39 (d,  $J = 7.9$  Hz, 1H, Ar-CH), 7.20 (t,  $J = 7.8$  Hz, 1H, Ar-CH), 3.18 (q,  $J = 6.6$  Hz, 1H, CH), 2.57 (m, 2H, N- $\text{CH}_2$ ), 2.40 (m, 2H, N- $\text{CH}_2$ ), 1.80 (m, 4H, 2\* $\text{CH}_2$ ), 1.41 (d,  $J = 6.6$  Hz, 3H,  $\text{CH}_3$ );  $^{13}\text{C}$  NMR (125 MHz,  $\text{CDCl}_3$ ):  $\delta$  148.3 (Ar-CBr), 130.2, 129.9, 129.9, 125.9, 122.4, 65.5, 52.9, 23.4, 23.2. HRMS calcd for  $\text{C}_{12}\text{H}_{17}\text{BrN}$   $[\text{M}+\text{H}]^+$ : 254.0466, found: 254.0525. Enantiomeric excess was determined by  $^1\text{H}$  NMR using (*R*)-2-acetoxy-2-phenylacetic acid as chemical shift reagent.

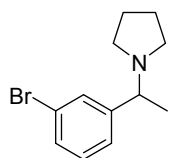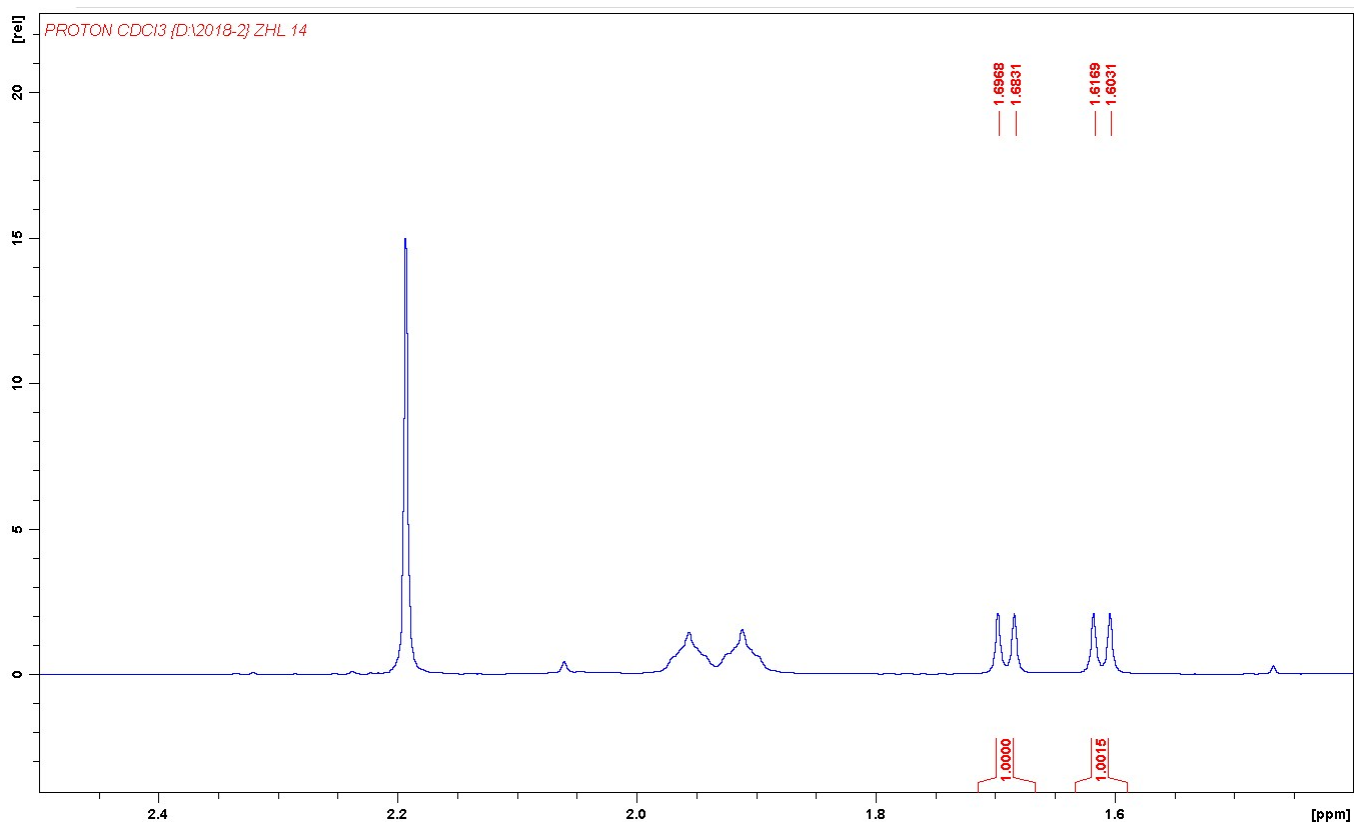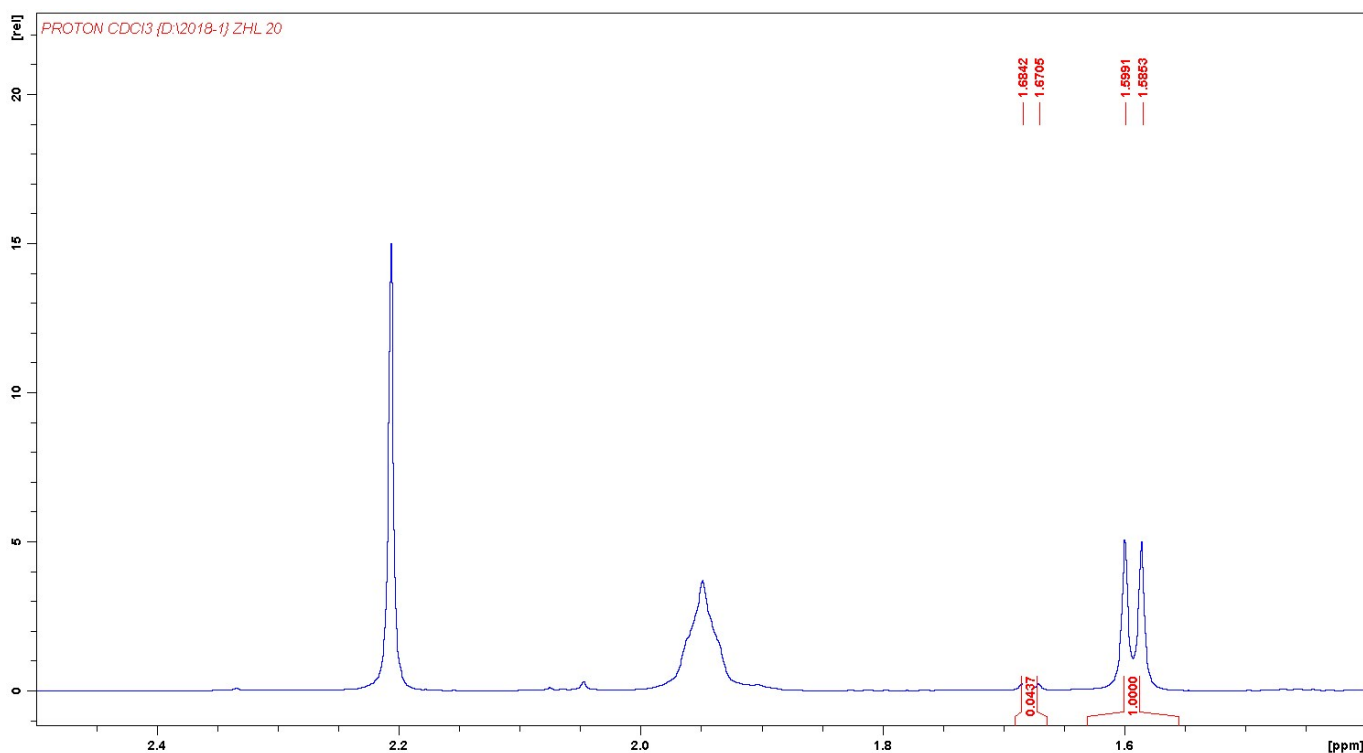

**1-(1-(3-trifluoromethylphenyl)ethyl)pyrrolidine (3n)**: 91% yield, 93% ee, brown oil.  $^1\text{H}$  NMR (500 MHz,  $\text{CDCl}_3$ ):  $\delta$  7.64 (s, 1H, Ar-CH), 7.57 (d,  $J = 7.6$  Hz, 1H, Ar-CH), 7.52 (d,  $J = 7.7$  Hz, 1H, Ar-CH), 7.45 (t,  $J = 7.7$  Hz, 1H, Ar-CH), 3.28 (q,  $J = 6.6$  Hz, 1H, CH), 2.58 (m, 2H, N- $\text{CH}_2$ ), 2.40 (m, 2H, N- $\text{CH}_2$ ), 1.81 (m, 4H, 2\* $\text{CH}_2$ ), 1.43 (d,  $J = 6.6$  Hz, 3H,  $\text{CH}_3$ );  $^{13}\text{C}$  NMR (125 MHz,  $\text{CDCl}_3$ ):  $\delta$  146.9 (Ar-C- $\text{CF}_3$ ), 130.6, 128.8, 124.0, 123.7, 65.7, 53.0, 23.4, 23.3. HRMS calcd for  $\text{C}_{12}\text{H}_{17}\text{BrN}$   $[\text{M}+\text{H}]^+$ : 254.0466, found: 254.0525. Enantiomeric excess was determined by  $^1\text{H}$  NMR using (*R*)-2-acetoxy-2-phenylacetic acid as chemical shift reagent.

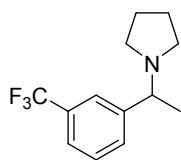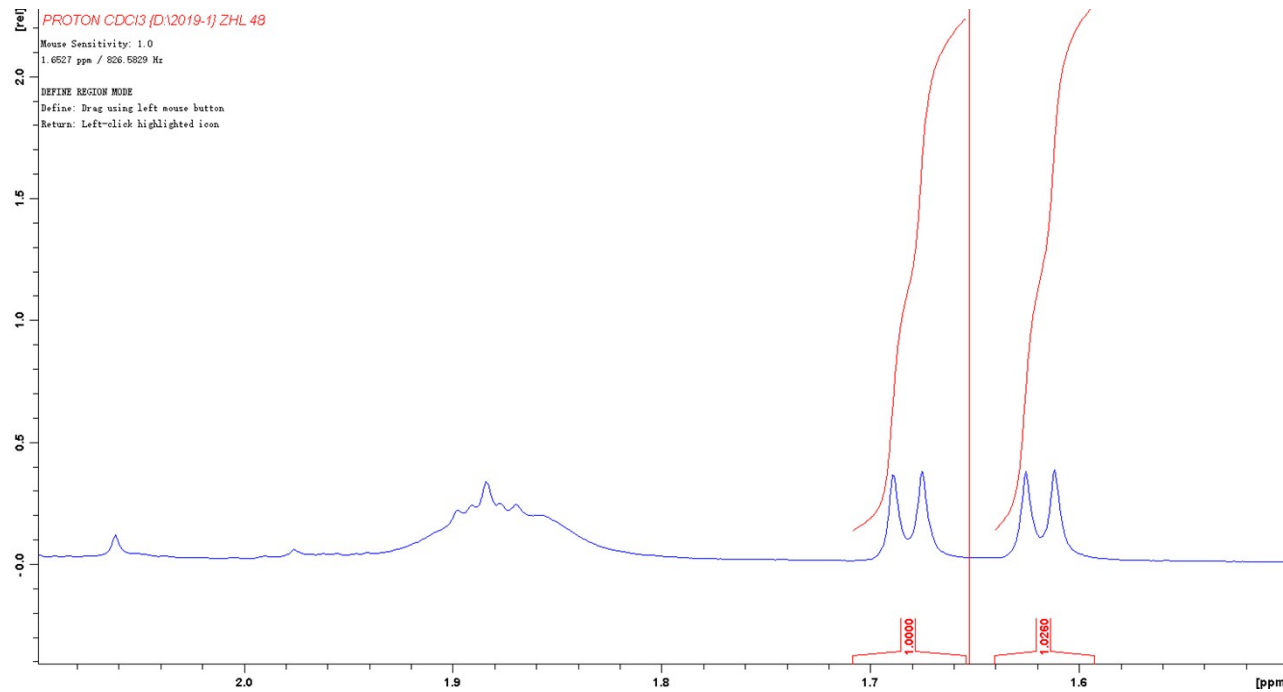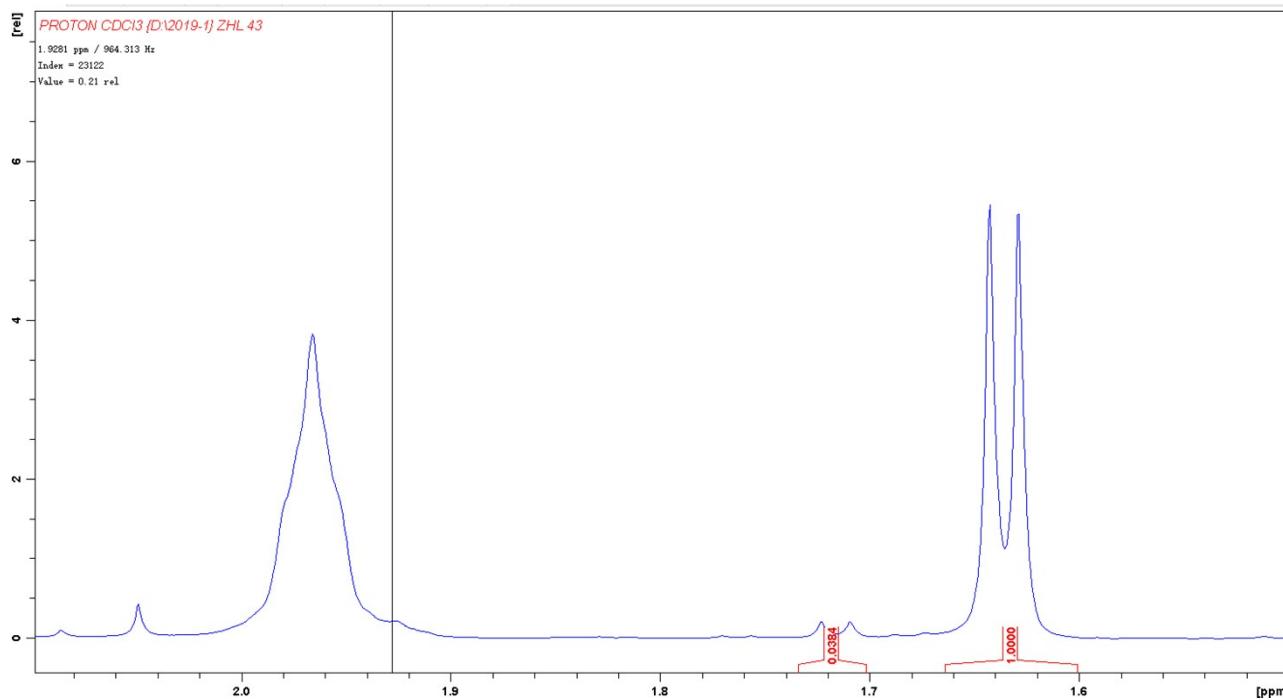



**1-(1-(*o*-tolyl)ethyl)pyrrolidine (3o):**<sup>3</sup> 89% yield, 94% ee, brown oil. <sup>1</sup>H NMR (500 MHz, CDCl<sub>3</sub>): δ 7.58 (m, 1H, Ar-CH), 7.24 (m, 1H, Ar-CH), 7.15(m, 1H, Ar-CH), 3.52 (q, *J* = 6.5 Hz, 1H, CH), 2.58 (m, 2H, N-CH<sub>2</sub>), 2.48 (m, 2H, N-CH<sub>2</sub>), 2.42 (s, 3H, Ar-CH<sub>3</sub>), 1.82 (m, 4H, 2\*CH<sub>2</sub>), 1.38 (d, *J* = 6.0 Hz, 3H, CH<sub>3</sub>); <sup>13</sup>C NMR (125 MHz, CDCl<sub>3</sub>): δ 144.1, 134.5, 130.2, 126.9, 126.2, 126.1, 61.2, 53.0, 23.5, 22.4, 19.6. Enantiomeric excess was determined by <sup>1</sup>H NMR using (*S*)-2-acetoxy-2-phenylacetic acid as chemical shift reagent.

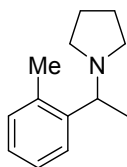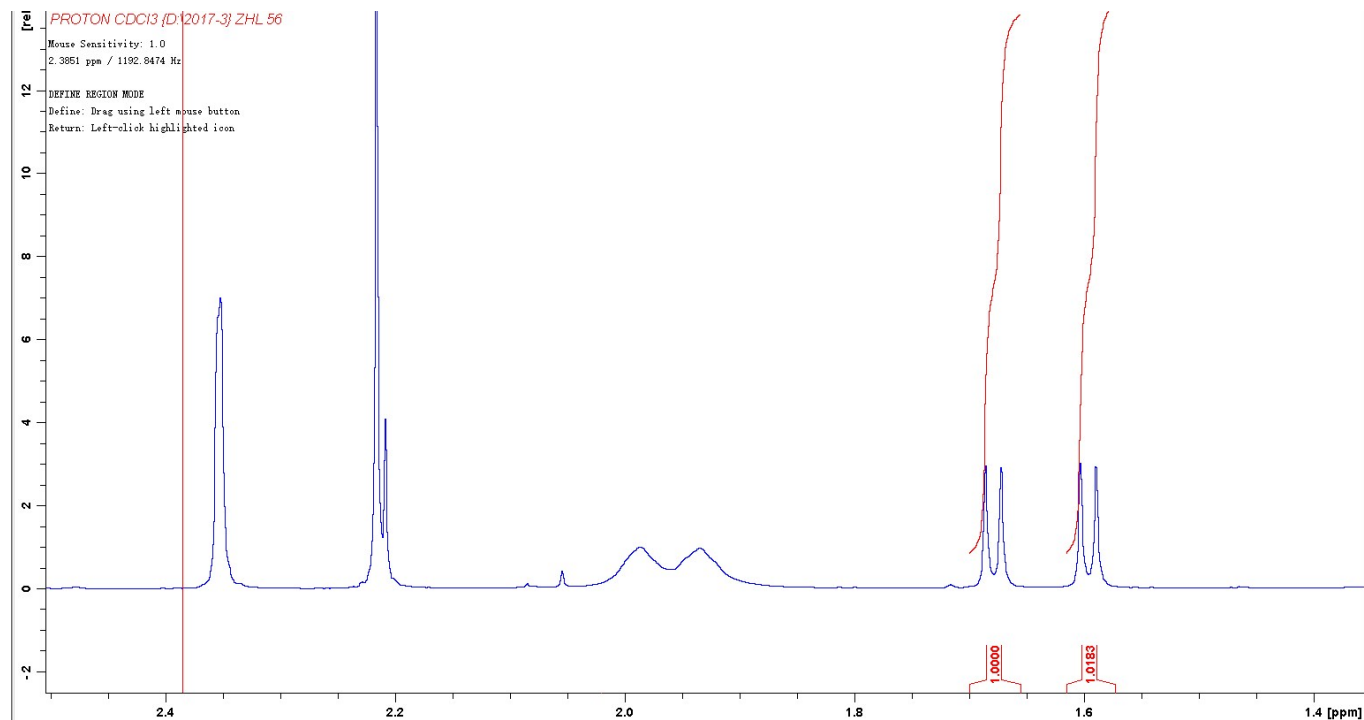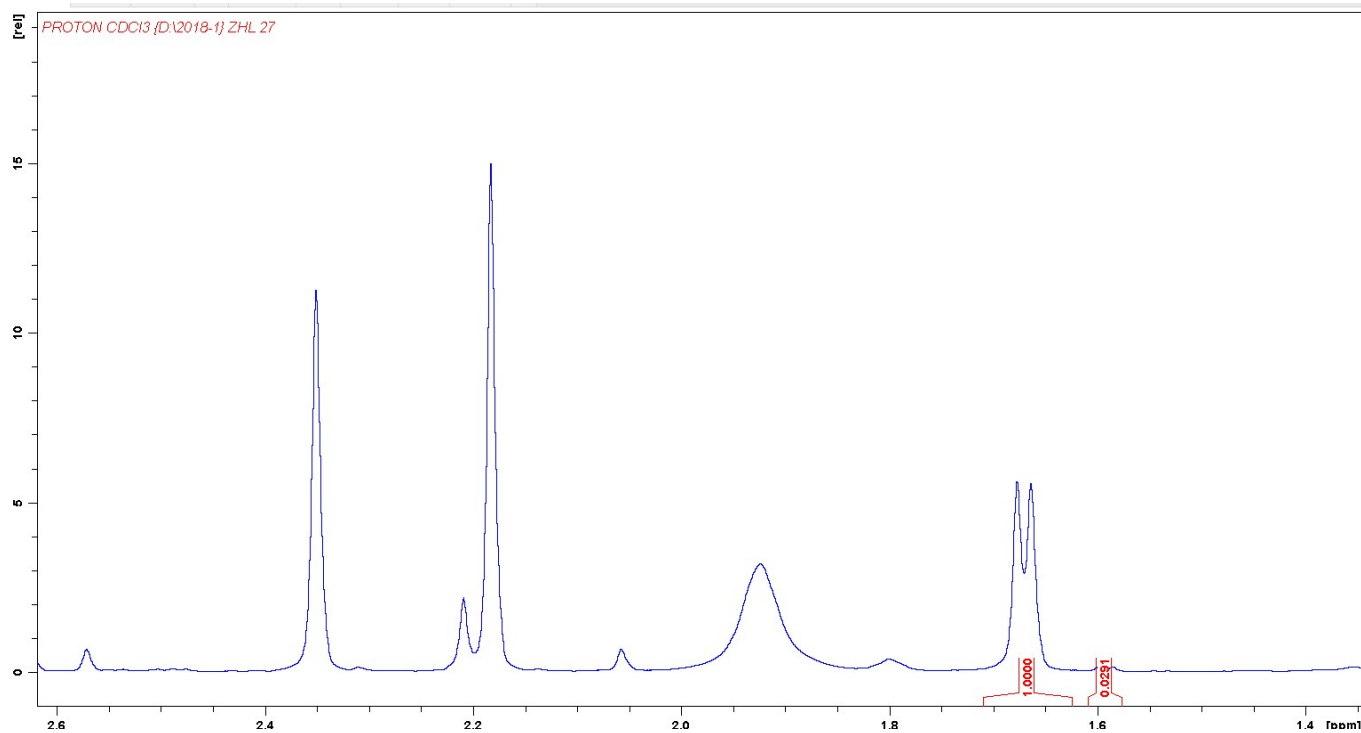

**1-(1-(2-methoxyphenyl)ethyl)pyrrolidine (3p)**:<sup>3</sup> 97% yield, 94% ee, brown oil. <sup>1</sup>H NMR (500 MHz, CDCl<sub>3</sub>): δ 7.56 (m, 1H, Ar-CH), 7.23 (m, 1H, Ar-CH), 7.01 (m, 1H, Ar-CH), 6.90 (m, 1H, Ar-CH), 3.82-3.90 (m, 4H, O-CH<sub>3</sub>+CH), 2.60 (m, 2H, N-CH<sub>2</sub>), 2.51 (m, 2H, N-CH<sub>2</sub>), 1.80 (m, 4H, 2\*CH<sub>2</sub>), 1.39 (d, *J* = 6.6 Hz, 3H, CH<sub>3</sub>); <sup>13</sup>C NMR (125 MHz, CDCl<sub>3</sub>): δ 156.2 (Ar-COMe), 130.0, 128.9, 121.6, 110.8, 57.8, 55.6, 52.5, 23.4, 19.6. Enantiomeric excess was determined by chiral HPLC: Chiralpak OD-H column, Hex/IPA=99.5:0.5, 0.6 mL/min, 220 nm, 7.46 min, 8.50 min.

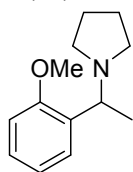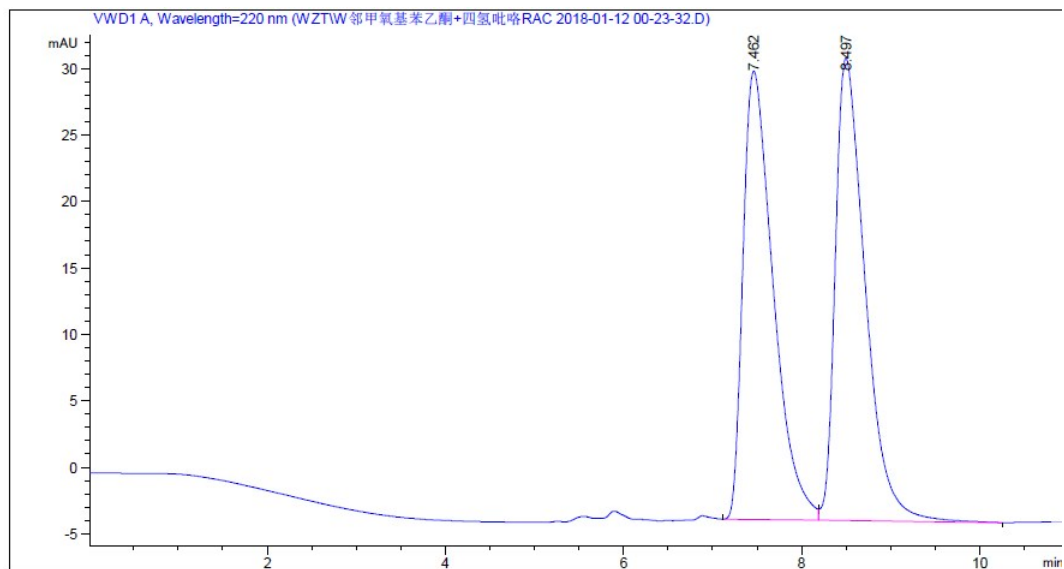

| # | [min]    | [min]  | [mAU*s]   | [mAU]    | %       |
|---|----------|--------|-----------|----------|---------|
| 1 | 7.462 BV | 0.3623 | 795.36249 | 33.70512 | 49.4860 |
| 2 | 8.497 VB | 0.3593 | 811.88580 | 34.78402 | 50.5140 |

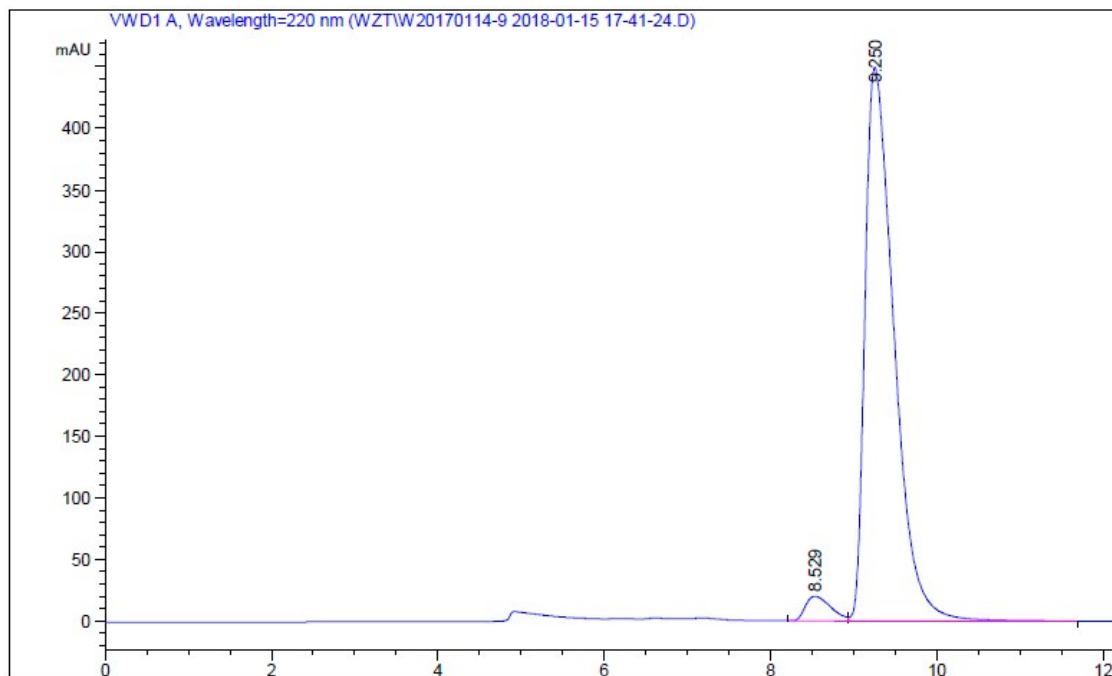

| # | [min]    | [min]  | [mAU*s]   | [mAU]     | %       |
|---|----------|--------|-----------|-----------|---------|
| 1 | 8.529 BV | 0.3350 | 424.18607 | 20.03264  | 3.7601  |
| 2 | 9.250 VB | 0.3797 | 1.08571e4 | 449.61316 | 96.2399 |

**1-(1-(2-chlorophenyl)ethyl)pyrrolidine (3q)**: 91% yield, 92% ee, brown oil, unknown compound.  $^1\text{H}$  NMR (500 MHz,  $\text{CDCl}_3$ ):  $\delta$  7.38 (m, 1H, Ar-CH), 7.20–7.30 (m, 3H, Ar-CH), 3.20 (q,  $J = 6.6$  Hz, 1H, CH), 2.58 (m, 2H, N- $\text{CH}_2$ ), 2.40 (m, 2H, N- $\text{CH}_2$ ), 1.80 (m, 4H,  $2^*\text{CH}_2$ ), 1.42 (d,  $J = 6.6$  Hz, 3H,  $\text{CH}_3$ );  $^{13}\text{C}$  NMR (125 MHz,  $\text{CDCl}_3$ ):  $\delta$  142.1, 132.6, 129.3, 128.8, 127.9, 127.2, 61.0, 52.8, 23.5, 21.9. HRMS calcd for  $\text{C}_{12}\text{H}_{17}\text{ClN}$   $[\text{M}+\text{H}]^+$ : 210.10440, found 210.10420. Enantiomeric excess was determined by  $^1\text{H}$  NMR using (*S*)-2-acetoxy-2-phenylacetic acid as chemical shift reagent.

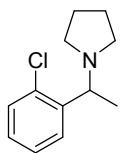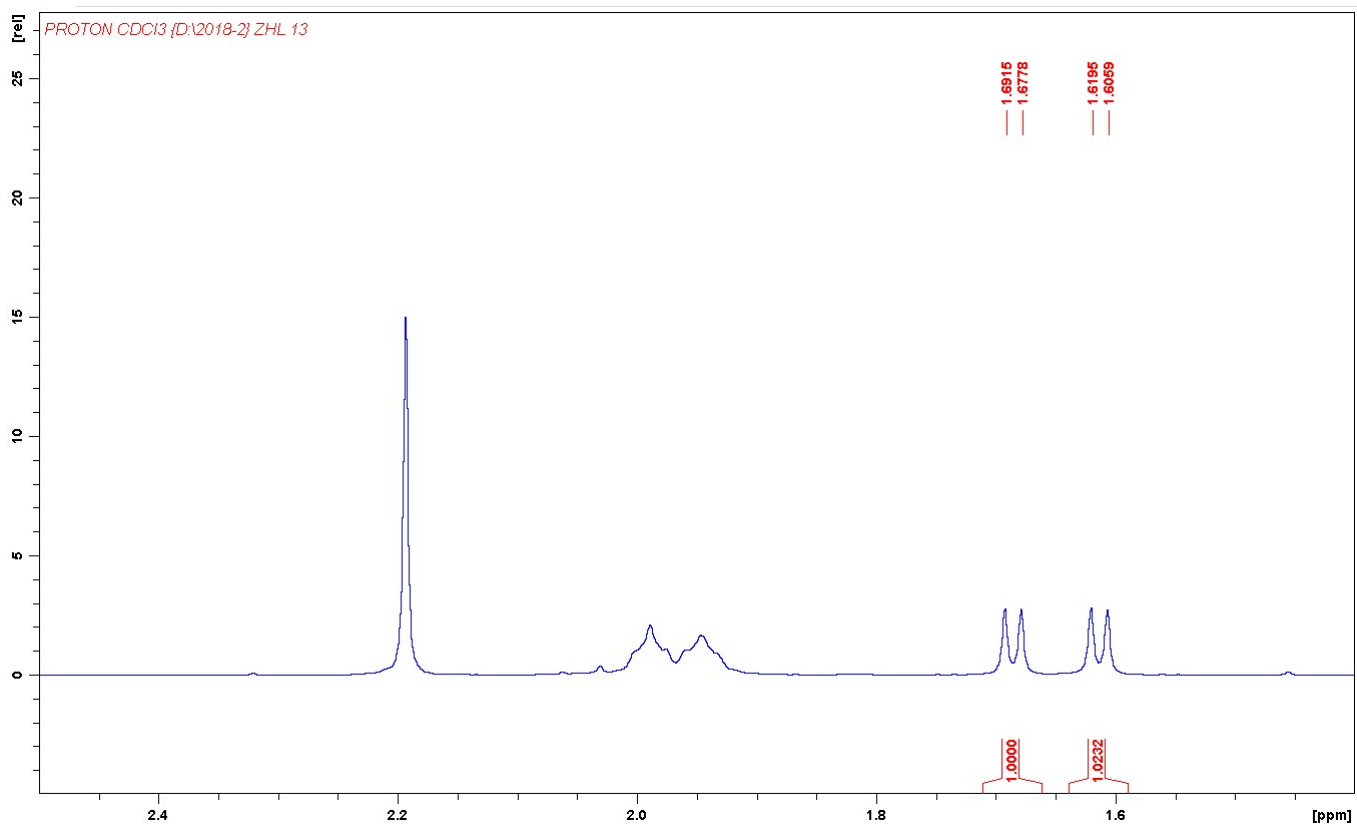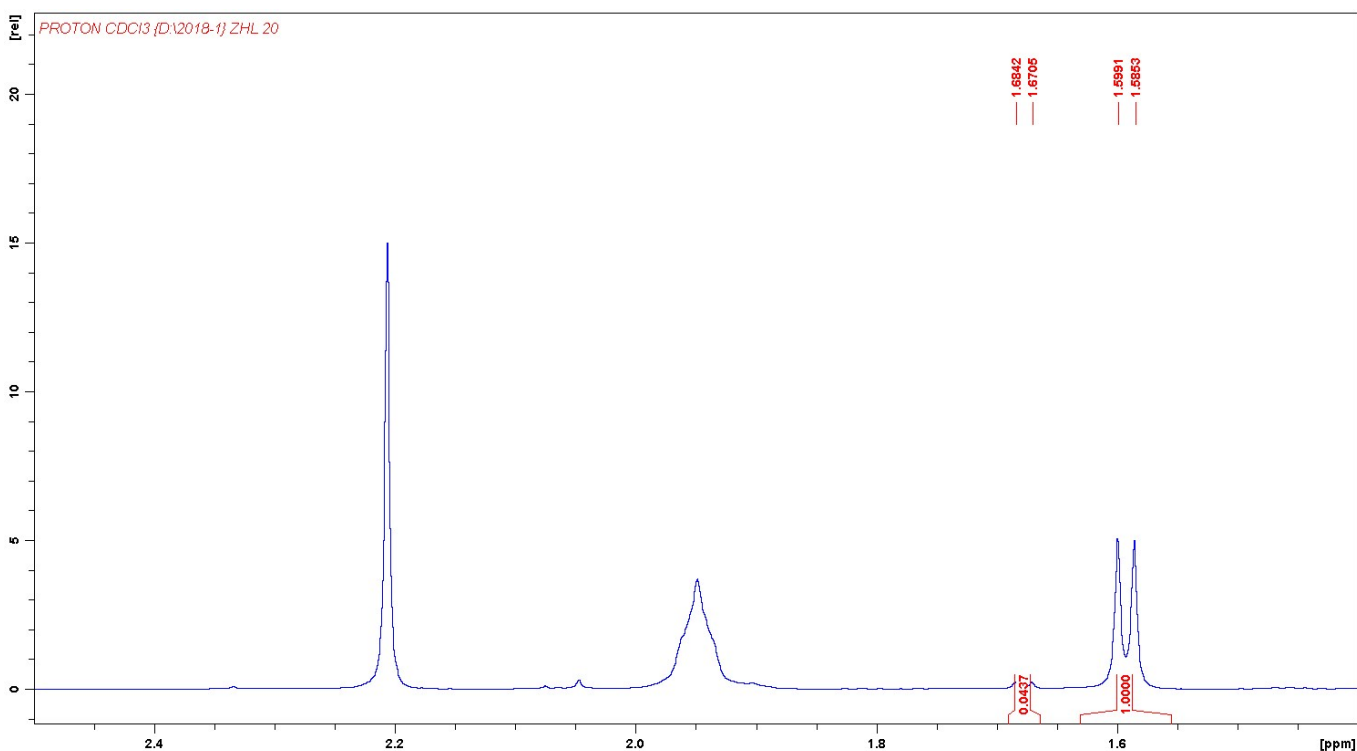

**1-(1-(2-nitrophenyl)ethyl)pyrrolidine (3r)**: 94% yield, 97% ee, brown oil, unknown compound.  $^1\text{H}$  NMR (500 MHz,  $\text{CDCl}_3$ ):  $\delta$  7.90 (d,  $J = 7.7$  Hz, 1H, Ar-CH), 7.72 (d,  $J = 8.0$  Hz, 1H, Ar-CH), 7.59 (t,  $J = 7.5$  Hz, 1H, Ar-CH), 7.37 (q,  $J = 7.5$  Hz, 1H, Ar-CH), 3.71 (q,  $J = 6.1$  Hz, 1H, CH), 2.54 (m, 2H, N- $\text{CH}_2$ ), 2.40 (m, 2H, N- $\text{CH}_2$ ), 1.79 (m, 4H, 2\* $\text{CH}_2$ ), 1.50 (d,  $J = 6.1$  Hz, 3H,  $\text{CH}_3$ );  $^{13}\text{C}$  NMR (125 MHz,  $\text{CDCl}_3$ ):  $\delta$  149.4, 140.0, 132.6, 129.3, 127.3, 123.3, 59.7, 52.7, 23.5, 22.7. HRMS (ESI)  $m/z$  calcd for  $\text{C}_{12}\text{H}_{17}\text{N}_2\text{O}_2^+$   $[\text{M}+\text{H}]^+$  221.12845, found 221.12848. Enantiomeric excess was determined by  $^1\text{H}$  NMR using (*R*)-2-acetoxy-2-phenylacetic acid as chemical shift reagent.

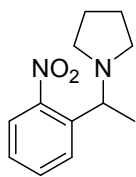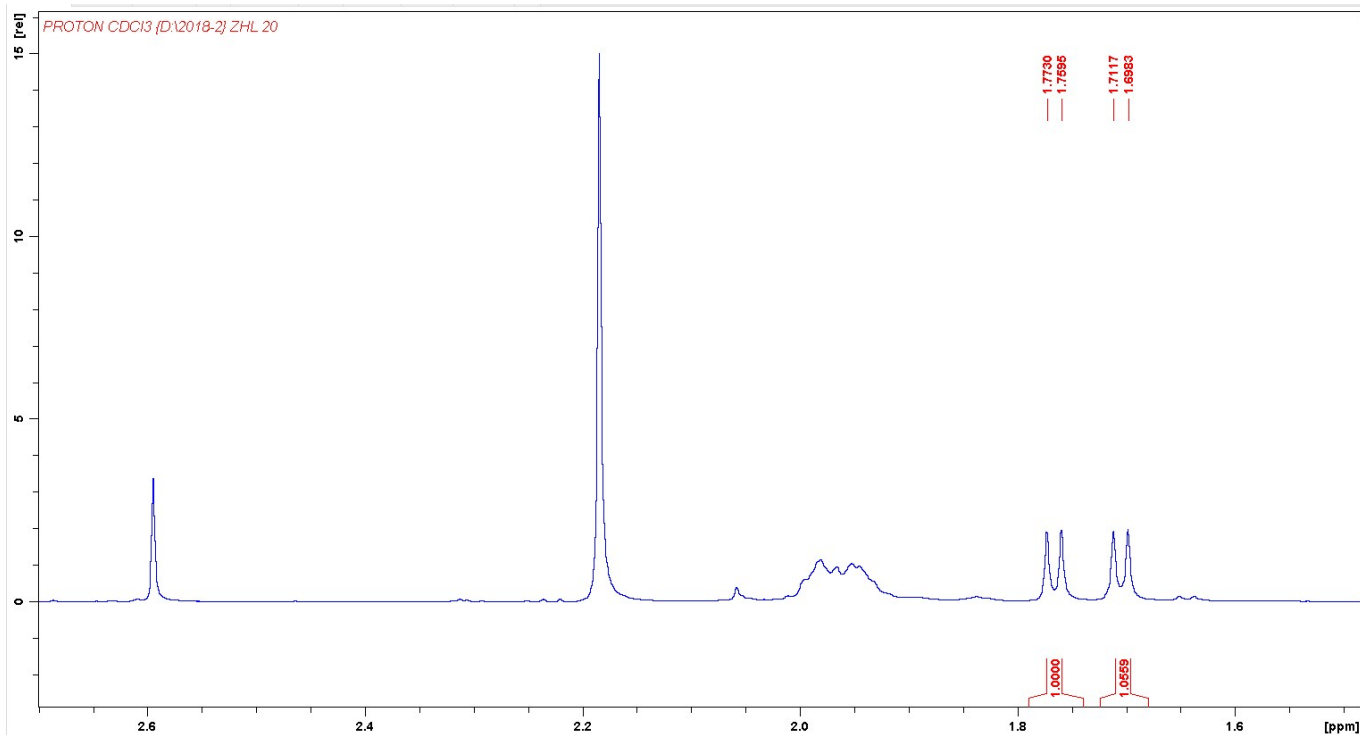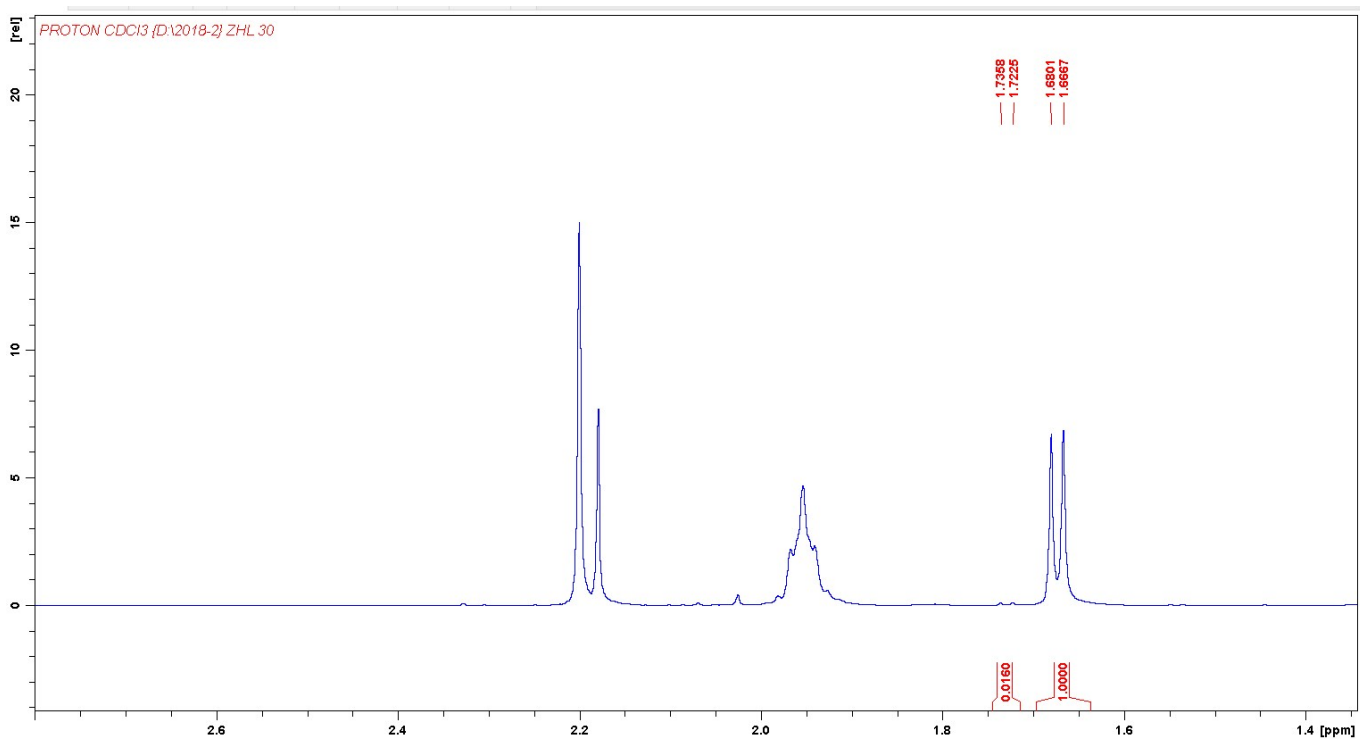

**1-(1-(thiophen-2-yl)ethyl)pyrrolidine (3s)**: 91% yield, 82% ee, brown oil, unknown compound.  $^1\text{H}$  NMR (500 MHz,  $\text{CDCl}_3$ ):  $\delta$  7.22 (m, 1H, Ar-CH), 6.95 (m, 3H, Ar-CH), 3.73 (q,  $J = 6.6$  Hz, 1H, CH), 2.64 (m, 2H, N- $\text{CH}_2$ ), 2.53 (m, 2H, N- $\text{CH}_2$ ), 1.81 (m, 4H, 2\* $\text{CH}_2$ ), 1.54 (d,  $J = 6.7$  Hz, 3H,  $\text{CH}_3$ );  $^{13}\text{C}$  NMR (125 MHz,  $\text{CDCl}_3$ ):  $\delta$  126.0, 123.8, 123.7, 59.8, 52.0, 23.5. HRMS (ESI)  $m/z$  calcd for  $\text{C}_{10}\text{H}_{16}\text{NS}^+$   $[\text{M}+\text{H}]^+$  182.09980, found 182.09961. Enantiomeric excess was determined by  $^1\text{H}$  NMR using (*R*)-2-acetoxy-2-phenylacetic acid as chemical shift reagent.

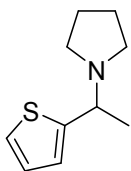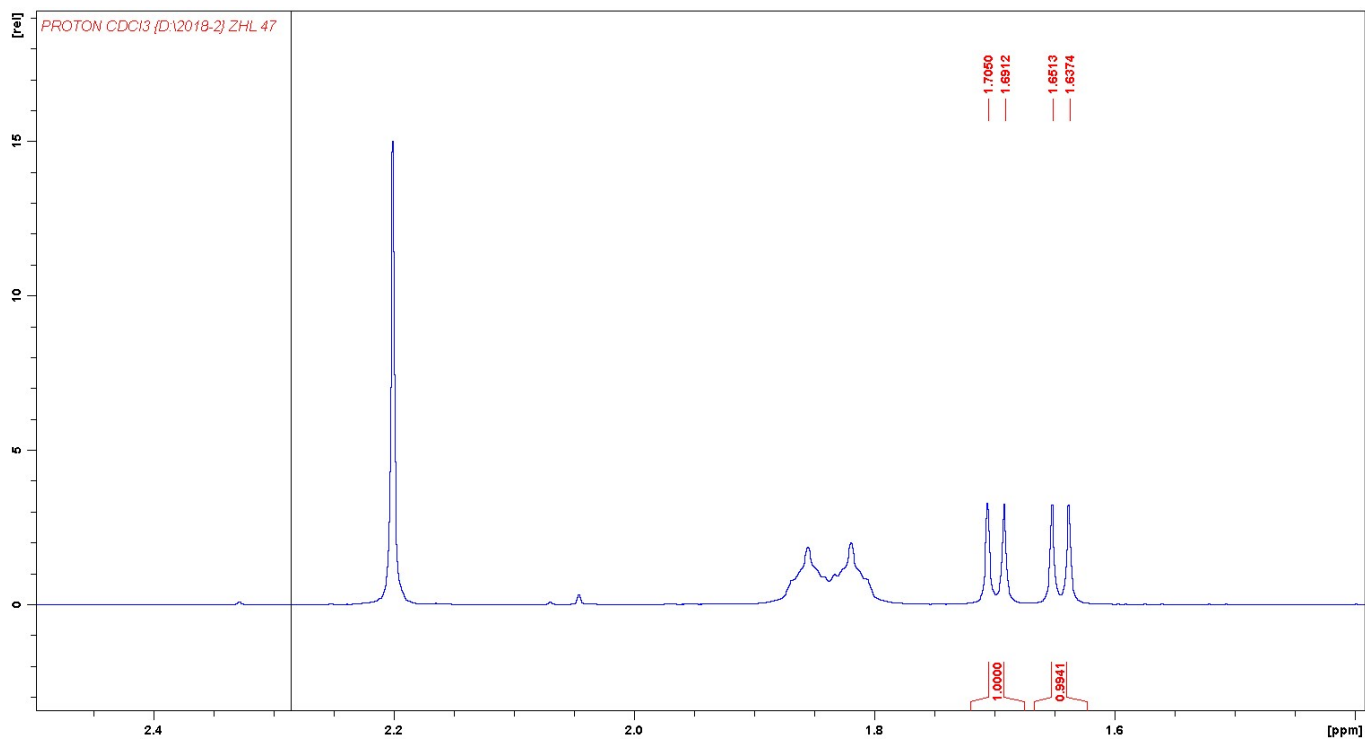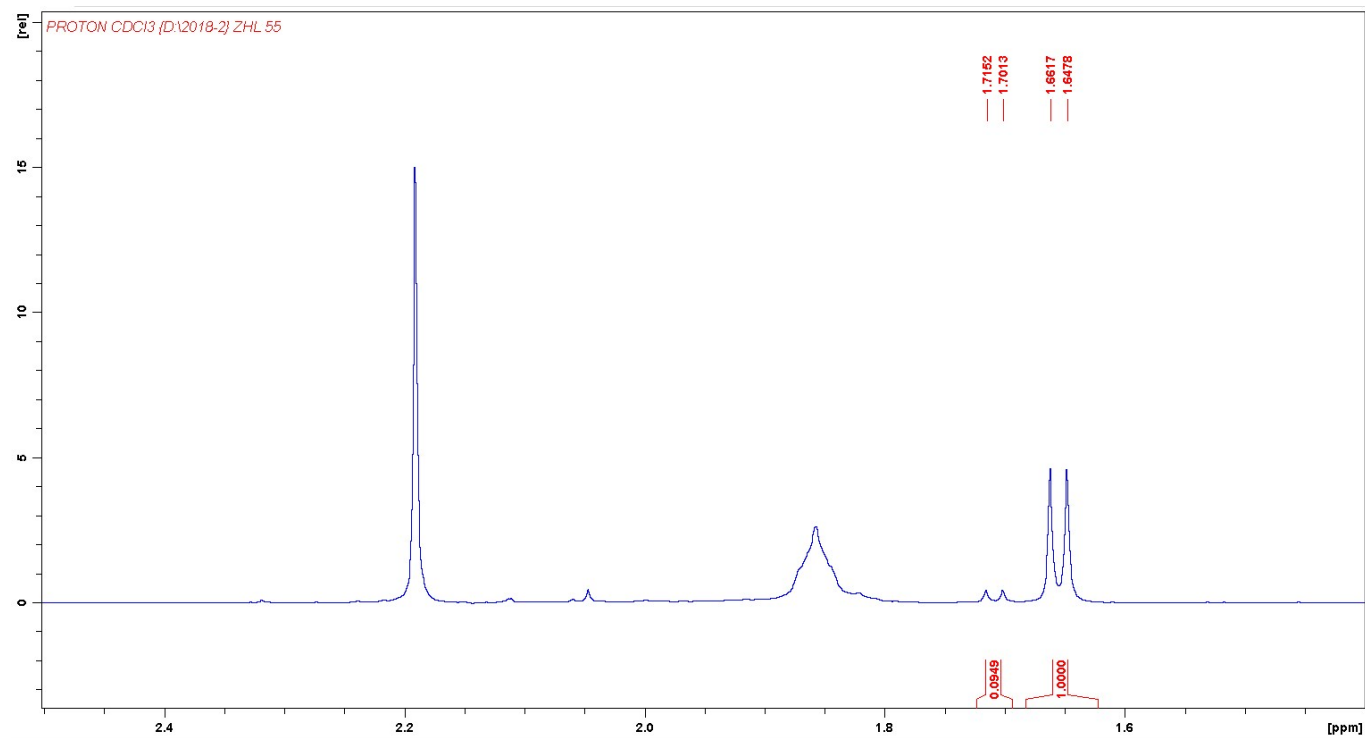

**1-(1-(naphthalen-1-yl)ethyl)pyrrolidine (3t)**:<sup>6</sup> 95% yield, 92% ee, brown oil. <sup>1</sup>H NMR (500 MHz, CDCl<sub>3</sub>): δ 8.51 (d, *J* = 6.8 Hz, 1H, Ar-CH), 7.93 (d, *J* = 7.6 Hz, 1H, Ar-CH), 7.80 (m, 2H, Ar-CH), 7.54 (m, 3H), 4.01 (m, 1H, CH), 2.69 (m, 2H, N-CH<sub>2</sub>), 2.57 (m, 2H, N-CH<sub>2</sub>), 1.86 (m, 4H, 2\*CH<sub>2</sub>), 1.60 (d, *J* = 6.4 Hz, 3H, CH<sub>3</sub>); <sup>13</sup>C NMR (125 MHz, CDCl<sub>3</sub>): δ 141.8, 134.0, 131.1, 128.9, 127.0, 125.7, 125.5, 125.2, 124.6, 123.7, 62.4, 53.1, 23.6, 22.9. Enantiomeric excess was determined by <sup>1</sup>H NMR using (*R*)-2-acetoxy-2-phenylacetic acid as chemical shift reagent.

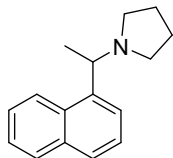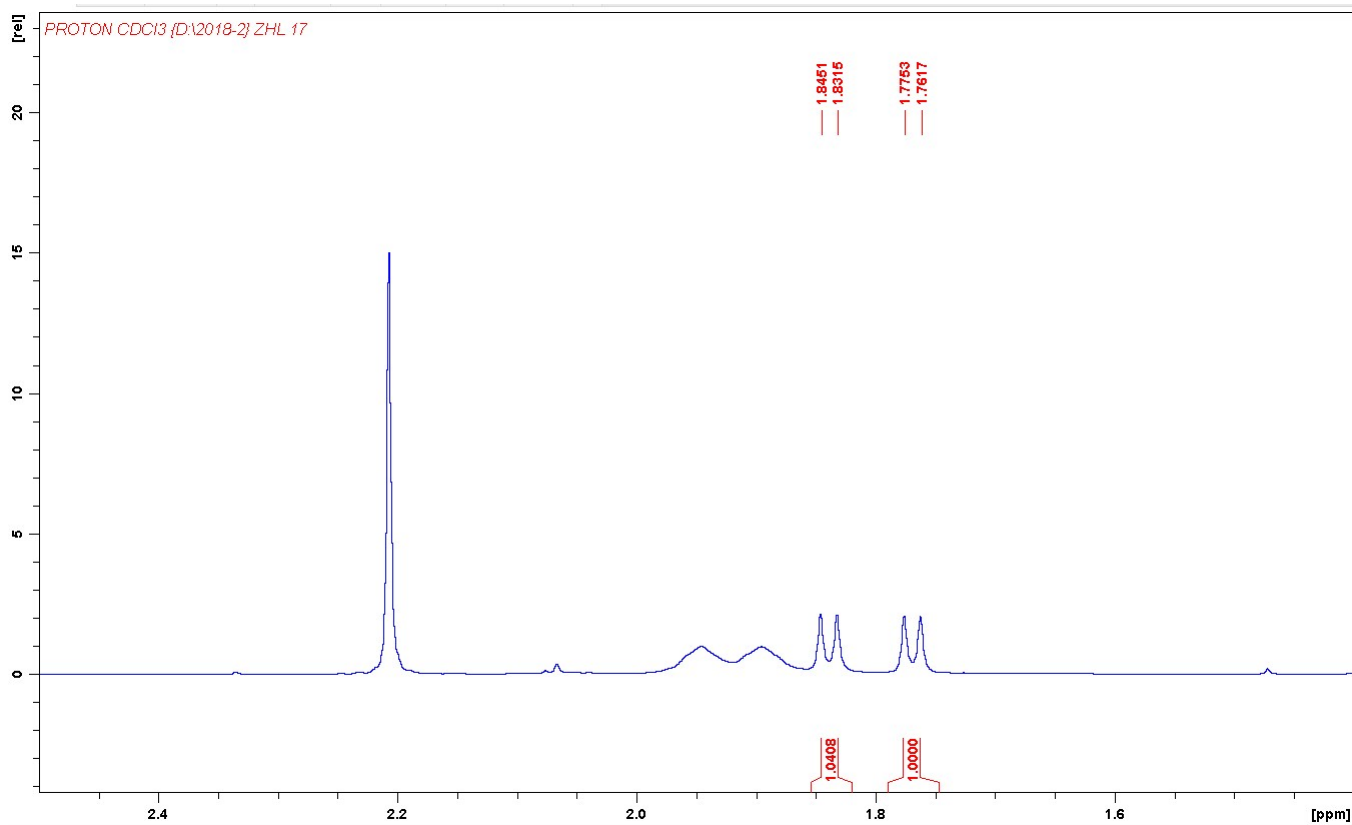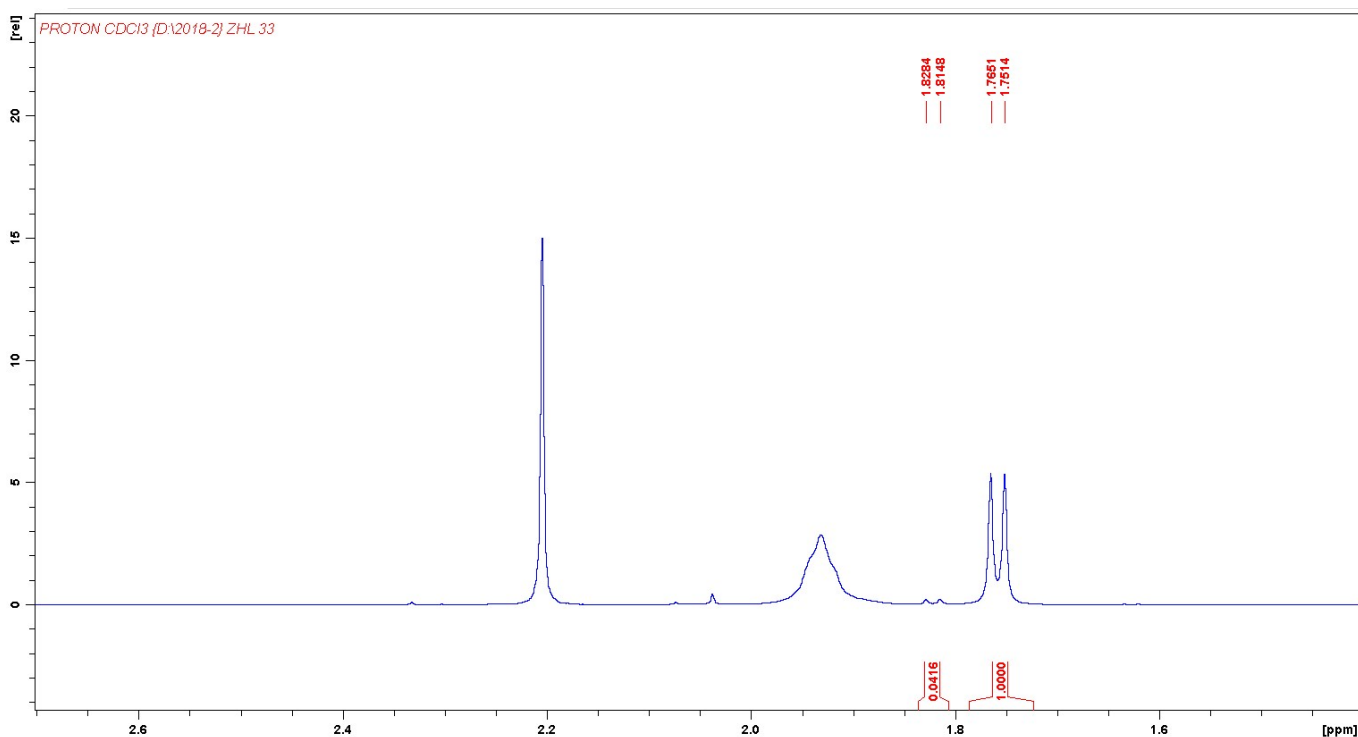

**1-(1,2,3,4-tetrahydronaphthalen-1-yl)pyrrolidine (3u):**<sup>7</sup> 83% yield, 95% ee, yellow oil. <sup>1</sup>H NMR (500 MHz, CDCl<sub>3</sub>): δ 7.42

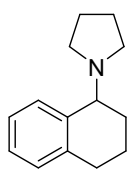

(d, *J* = 7.3 Hz, 1H, Ar-CH), 7.17 (m, 3H, Ar-CH), 3.61 (t, *J* = 5.0 Hz, 1H, CH), 2.95 (m, 1H, CH<sub>2</sub>), 2.80 (m, 1H, CH<sub>2</sub>), 2.71 (m, 2H, N-CH<sub>2</sub>), 2.54 (m, 2H, N-CH<sub>2</sub>), 2.16 (m, 1H, CH<sub>2</sub>), 2.00 (m, 1H, CH<sub>2</sub>), 1.70–1.90 (m, 6H, 2\*CH<sub>2</sub>+CH<sub>2</sub>); <sup>13</sup>C NMR (125 MHz, CDCl<sub>3</sub>): δ 138.8, 137.7, 129.4, 129.1, 126.6, 125.0, 60.7, 50.4, 29.1, 24.7, 23.8, 19.4. Enantiomeric excess was determined by chiral HPLC: Chiralpak OD-H column, Hex/IPA/TFA/DEA = 92:8:0.2:0.1, 0.5mL/min, 220 nm, 10.19 min, 12.55 min.

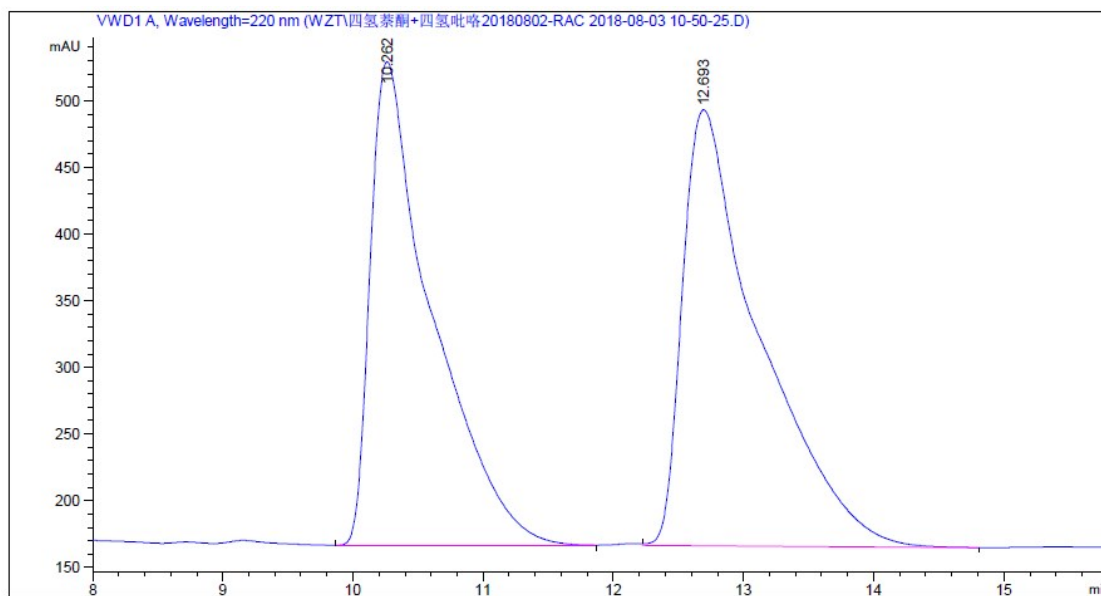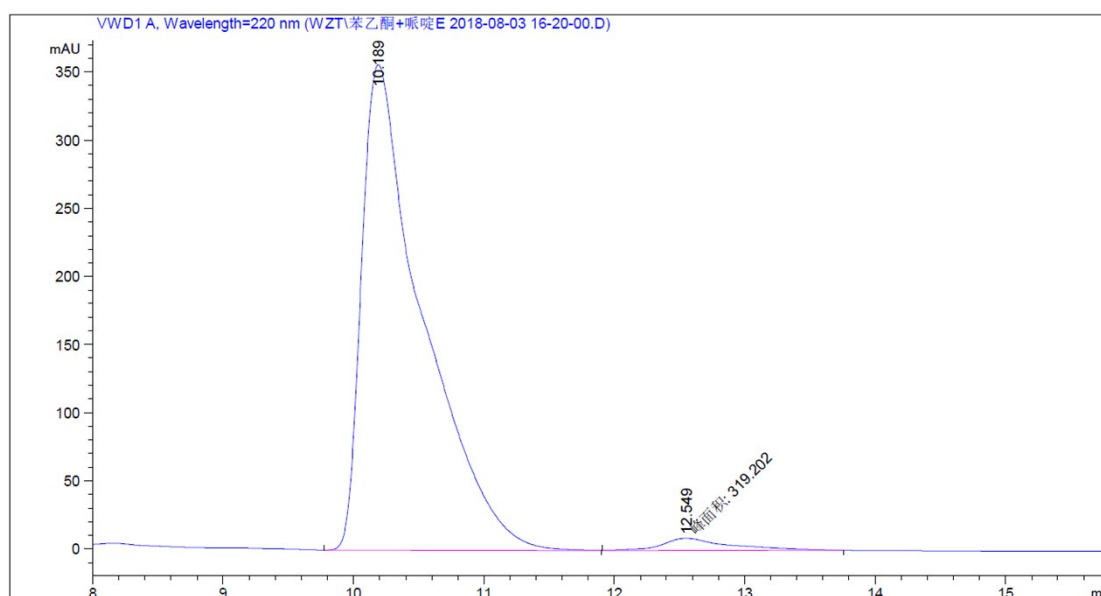

| # | [min]     | [min]  | [mAU*s]   | [mAU]     | %       |
|---|-----------|--------|-----------|-----------|---------|
| 1 | 10.189 BV | 0.4572 | 1.15778e4 | 356.22934 | 97.3170 |
| 2 | 12.549 MM | 0.5936 | 319.20221 | 8.96177   | 2.6830  |

**1-(1-(4-methoxyphenyl)propan-2-yl)pyrrolidine (3v):**<sup>8</sup> 97% yield, 6% ee, brown oil. <sup>1</sup>H NMR (500 MHz, CDCl<sub>3</sub>): δ 7.12 (d, *J* = 8.6 Hz, 2H, Ar-CH), 6.86 (d, *J* = 8.6 Hz, 2H, Ar-CH), 3.83 (s, 3H, O-CH<sub>3</sub>), 3.10 (dd, *J* = 8.6, 13.5 Hz, 1H, CH), 2.70 (m, 4H, 2\*N-CH<sub>2</sub>), 2.52 (m, 1H, CH<sub>2</sub>), 2.41 (m, 1H, CH<sub>2</sub>), 1.85 (m, 4H, 2\*CH<sub>2</sub>), 1.02 (d, *J* = 6.3 Hz, 3H, CH<sub>3</sub>); <sup>13</sup>C NMR (125 MHz, CDCl<sub>3</sub>): δ 158.2, 130.7, 130.3, 113.9, 61.6, 55.2, 51.2, 39.9, 23.5, 16.9. Enantiomeric excess was determined by <sup>1</sup>H NMR using (*R*)-2-acetoxy-2-phenylacetic acid as chemical shift reagent.

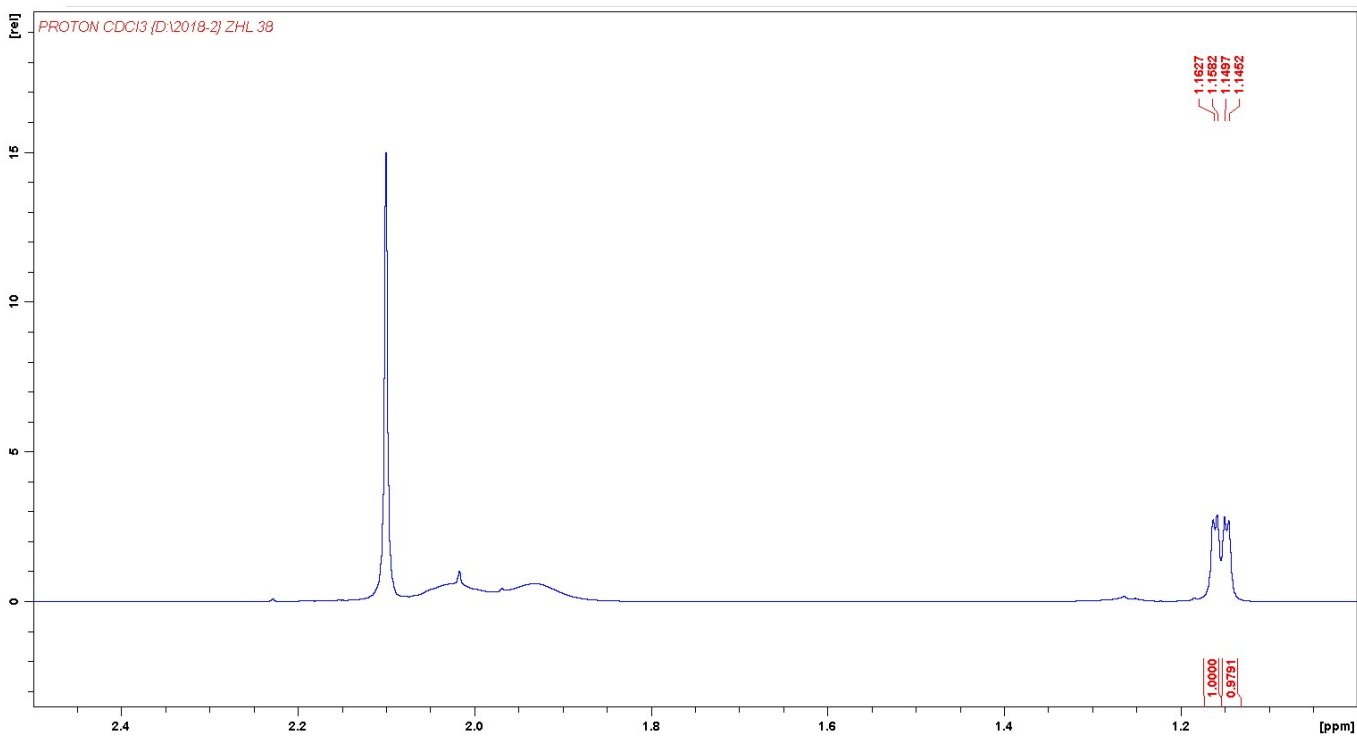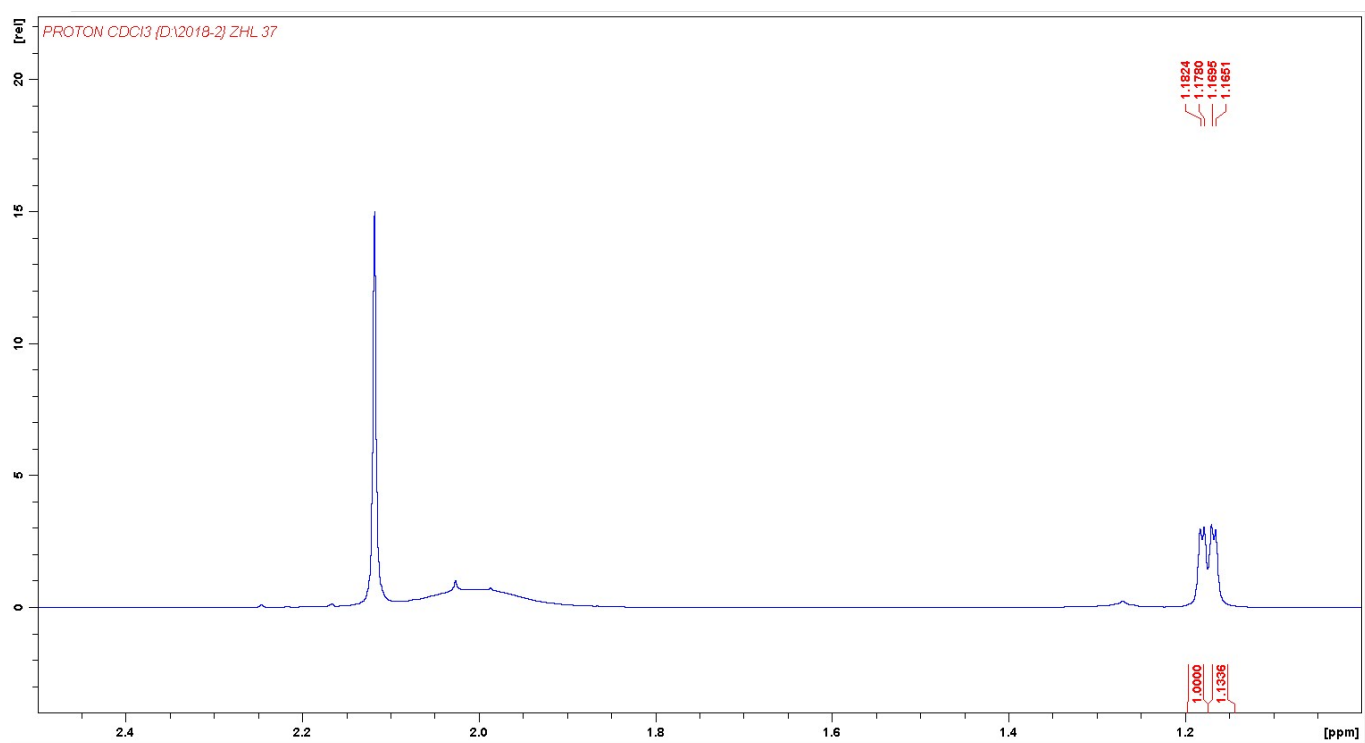



**1-(4-phenylbutan-2-yl)pyrrolidine (3w):**<sup>9</sup> 95% yield, 3% ee, brown oil. <sup>1</sup>H NMR (500 MHz, CDCl<sub>3</sub>): δ 7.32 (m, 2H, Ar-CH), 7.25 (m, 3H, Ar-CH), 2.78 (m, 1H, CH<sub>2</sub>), 2.62 (m, 5H, 2\*N-CH<sub>2</sub>+CH<sub>2</sub>), 2.41 (m, 1H, CH), 1.98 (m, 1H, CH<sub>2</sub>), 1.82 (m, 4H, 2\*CH<sub>2</sub>), 1.74 (m, 1H, CH<sub>2</sub>), 1.21 (d, *J* = 6.4 Hz, 3H, CH<sub>3</sub>); <sup>13</sup>C NMR (125 MHz, CDCl<sub>3</sub>): δ 141.1, 128.6, 128.3, 126.2, 59.3, 50.8, 35.2, 32.0, 23.6, 16.4. Enantiomeric excess was determined by chiral HPLC: Chiralpak OD-H column, Hex/IPA/TFA/DEA = 92:8:0.2:0.1, 0.5mL/min, 220 nm, 10.26 min, 12.68 min.

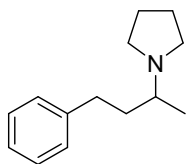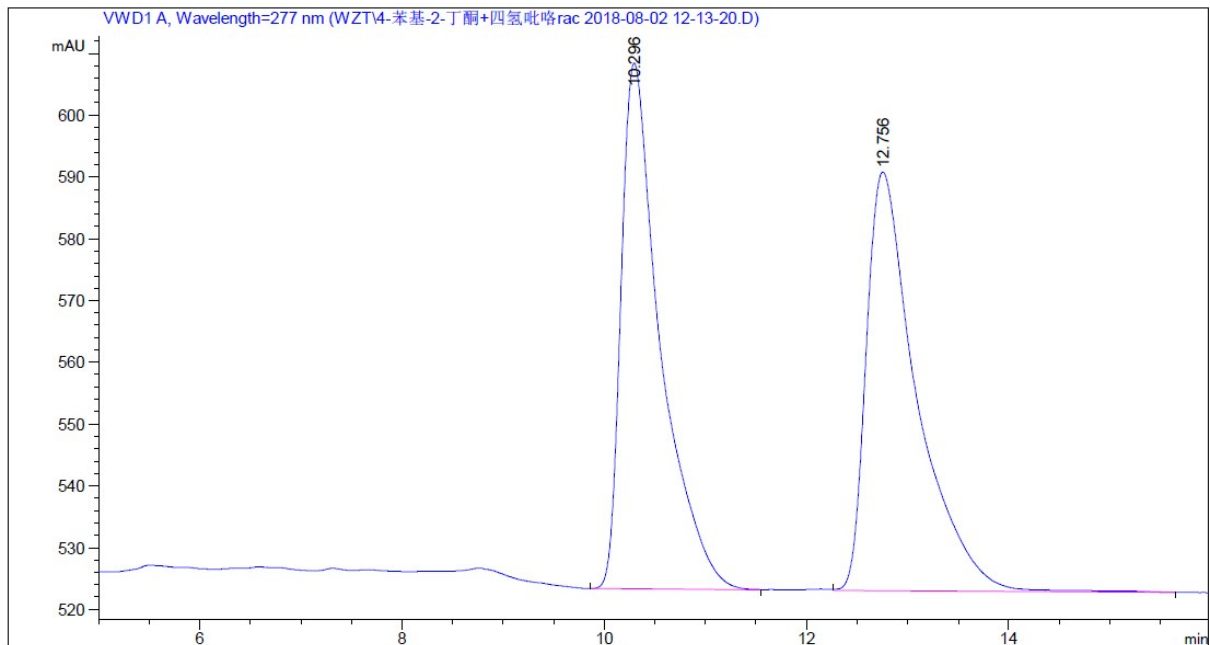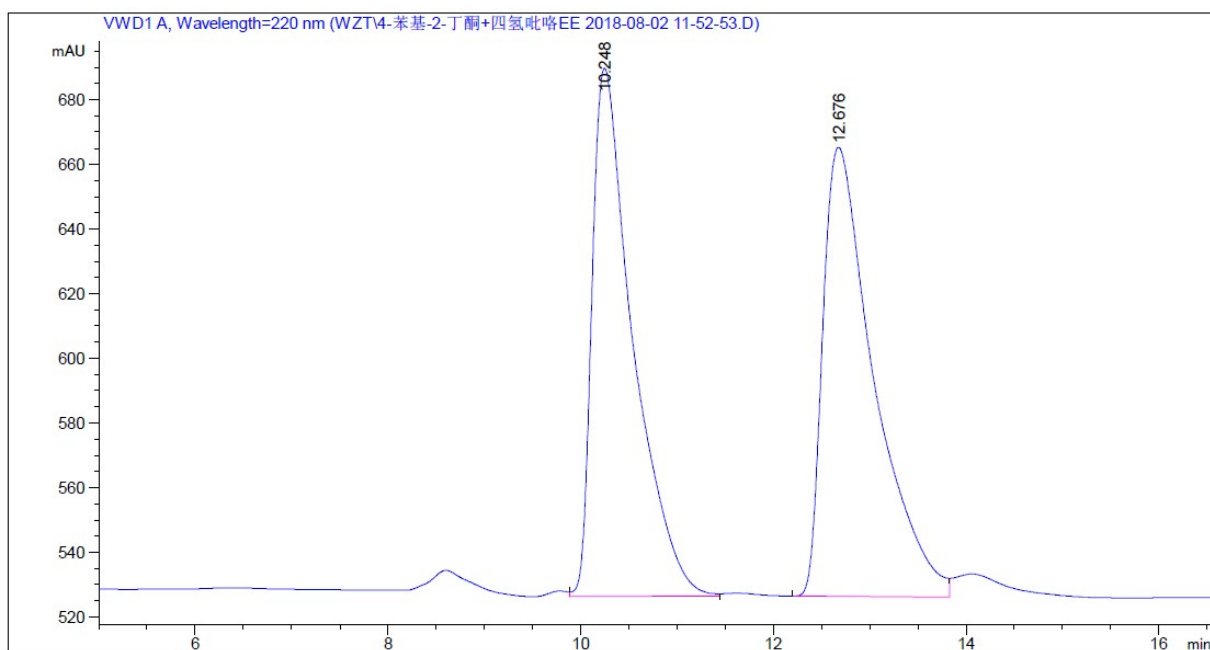

| # | [min]     | [min]  | [mAU*s]    | [mAU]     | %       |
|---|-----------|--------|------------|-----------|---------|
| 1 | 10.248 VV | 0.4291 | 4806.77734 | 163.45854 | 48.4685 |
| 2 | 12.676 BV | 0.5411 | 5110.53809 | 138.94679 | 51.5315 |

**4-(1-phenylethyl)morpholine (3ab):**<sup>2</sup> 89% yield, 92% *ee*, brown oil. <sup>1</sup>H NMR (500 MHz, CDCl<sub>3</sub>): δ 7.34(m, 4H, Ar-CH), 7.28 (m, 1H, Ar-CH), 3.72 (m, 4H, 2\*O-CH<sub>2</sub>), 3.34 (q, *J* = 6.7 Hz, 1H, CH), 2.52 (m, 2H, N-CH<sub>2</sub>), 2.41 (m, 2H, N-CH<sub>2</sub>), 1.40 (d, *J* = 6.7 Hz, 3H, CH<sub>3</sub>); <sup>13</sup>C NMR (125 MHz, CDCl<sub>3</sub>): δ 144.0, 128.3, 127.7, 127.0, 67.3, 65.4, 51.3, 19.9. Enantiomeric excess was determined by <sup>1</sup>H NMR using (*R*)-2-acetoxy-2-phenylacetic acid as chemical shift reagent.

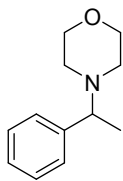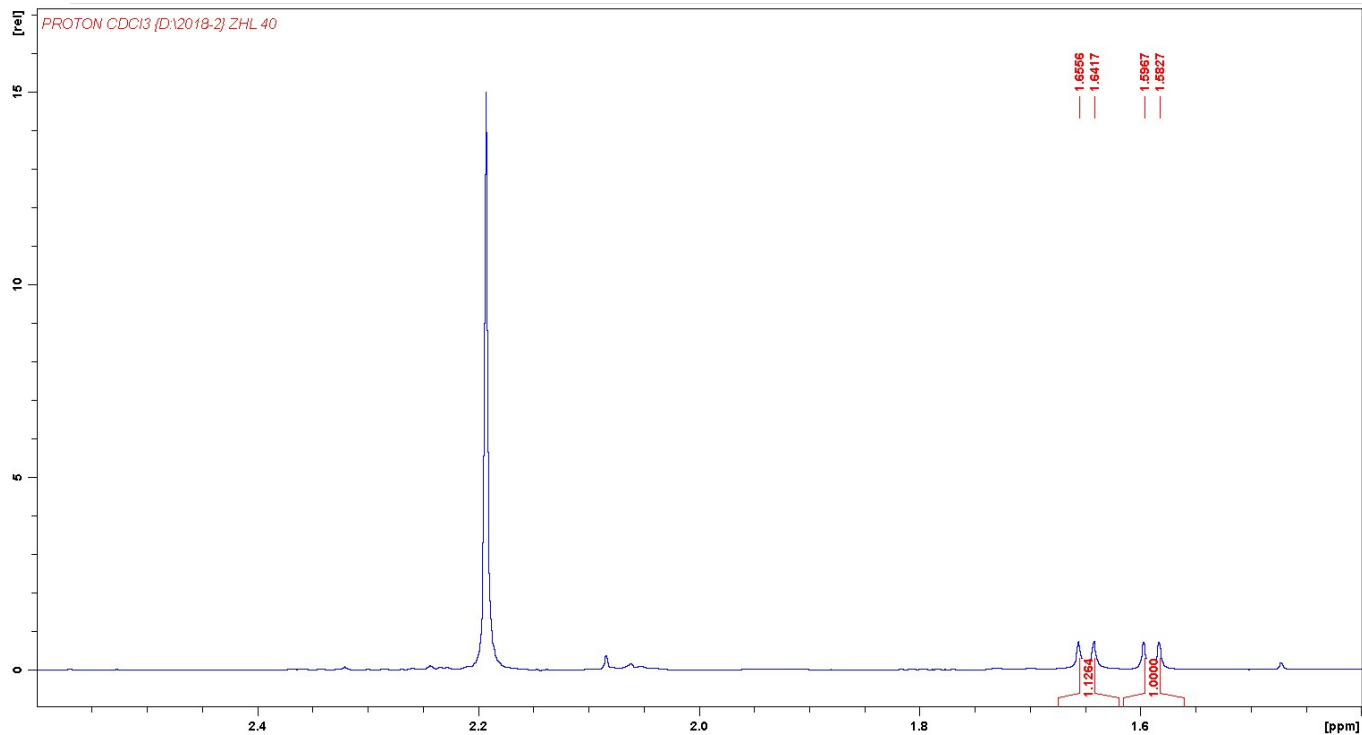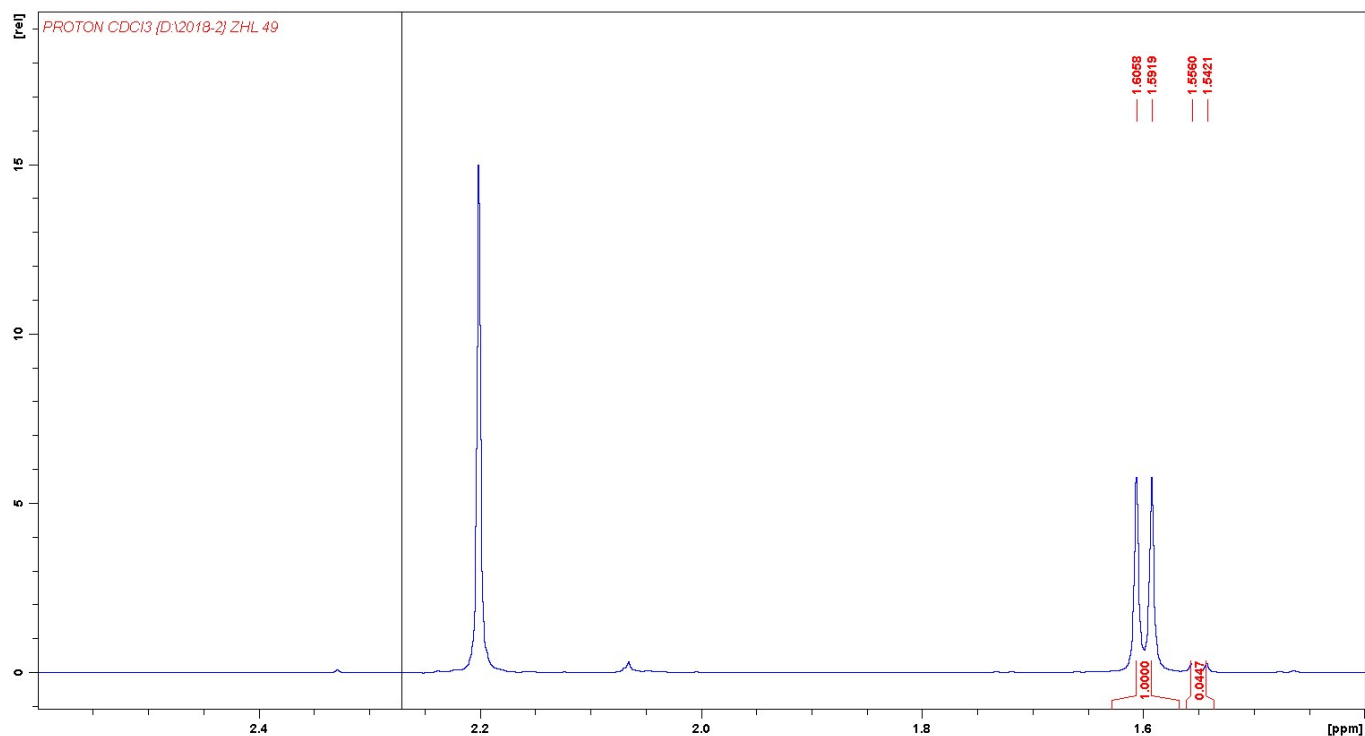

**2-(1-phenylethyl)-1,2,3,4-tetrahydroisoquinoline (3ac):**<sup>10</sup> 89% yield, 92% *ee*, brown oil. <sup>1</sup>H NMR (500 MHz, CDCl<sub>3</sub>): δ 7.54 (d, *J* = 7.3 Hz, 2H, Ar-CH), 7.48 (t, *J* = 7.4 Hz, 2H, Ar-CH), 7.40 (m, 1H, Ar-CH), 7.25 (m, 3H, Ar-CH), 7.13 (m, 1H, Ar-CH), 3.98 (d, *J* = 14.8 Hz, 1H, N-CH<sub>2</sub>-Ar), 3.72 (m, 2H, CH+N-CH<sub>2</sub>-Ar), 2.90-3.10 (m, 3H, CH<sub>2</sub>+CH<sub>2</sub>), 2.77 (m, 1H, CH<sub>2</sub>), 1.62 (d, *J* = 6.7 Hz, 3H, CH<sub>3</sub>); <sup>13</sup>C NMR (125 MHz, CDCl<sub>3</sub>): δ 144.5, 135.4, 134.8, 128.8, 128.5, 127.7, 127.1, 126.9, 126.1, 125.7, 64.6, 53.8, 48.2, 29.5, 20.3. Enantiomeric excess was determined by chiral HPLC: Chiralpak OJ-H column, Hex/IPA = 95:5, 1 mL/min, 220 nm, 10.52 min, 12.21 min.

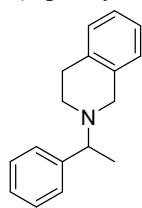

min.

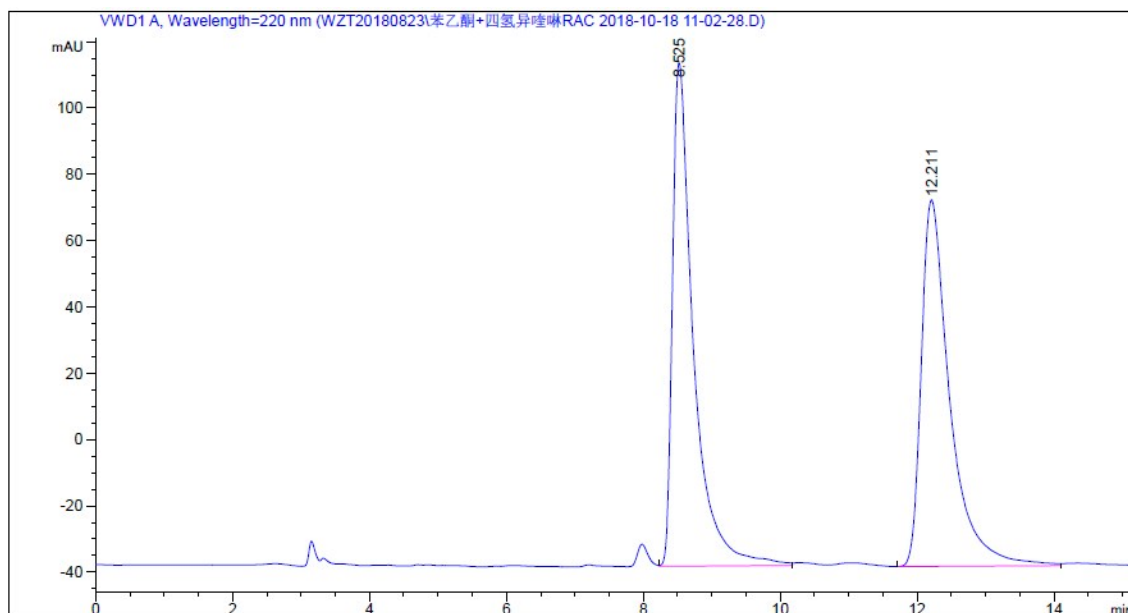

| # | [min]     | [min]  | [mAU*s]    | [mAU]     | %       |
|---|-----------|--------|------------|-----------|---------|
| 1 | 8.525 VV  | 0.3105 | 3233.55005 | 151.79967 | 50.2380 |
| 2 | 12.211 BV | 0.4280 | 3202.91626 | 110.54224 | 49.7620 |

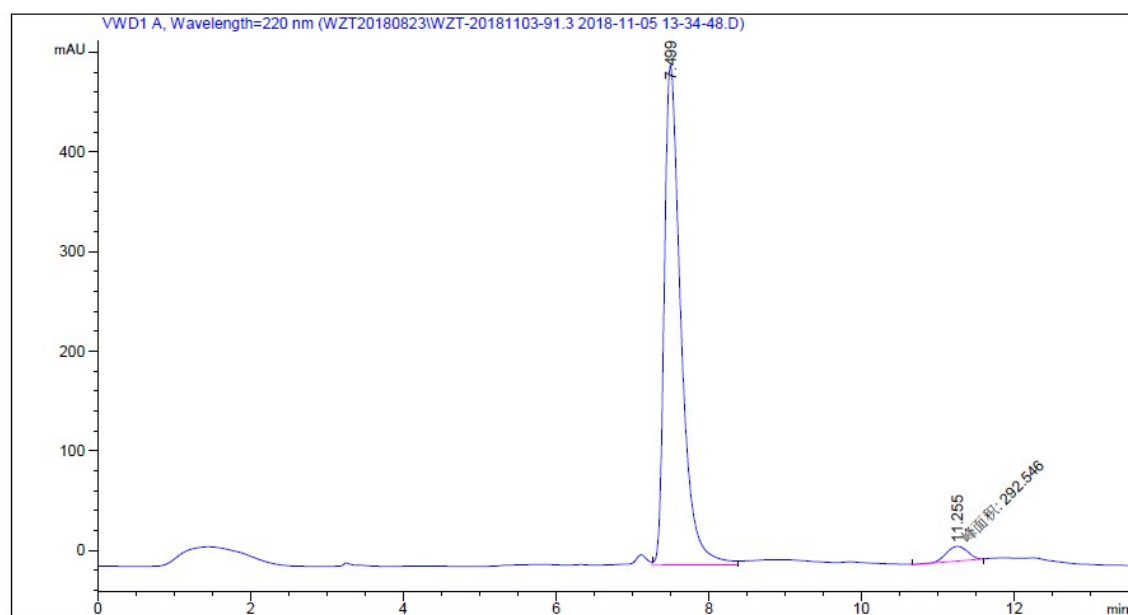

| # | [min]     | [min]  | [mAU*s]    | [mAU]     | %       |
|---|-----------|--------|------------|-----------|---------|
| 1 | 7.499 VV  | 0.2289 | 7604.13721 | 501.39032 | 96.2953 |
| 2 | 11.255 MM | 0.3296 | 292.54623  | 14.79080  | 3.7047  |

***N,N*-diethyl-1-phenylethan-1-amine (3ad)**:<sup>3</sup> 91% yield, 92% *ee*, brown oil. <sup>1</sup>H NMR (500 MHz, CDCl<sub>3</sub>): δ 7.40 (d, *J* = 7.4 Hz, 2H, Ar-CH), 7.35 (t, *J* = 7.4 Hz, 2H, Ar-CH), 7.25 (m, 1H, Ar-CH), 3.85 (q, *J* = 6.8 Hz, 1H, CH), 2.50-2.70 (m, 4H, 2\*N-CH<sub>2</sub>), 1.38 (d, *J* = 6.8 Hz, 3H, CH<sub>3</sub>), 1.04 (t, *J* = 7.2 Hz, 6H, 2\*CH<sub>3</sub>); <sup>13</sup>C NMR (125 MHz, CDCl<sub>3</sub>): δ 145.3, 128.1, 127.6, 126.5, 59.3, 42.9, 29.7, 18.4, 12.2. Enantiomeric excess was determined by <sup>1</sup>H NMR using (*S*)-2-acetoxy-2-phenylacetic acid as chemical shift reagent.

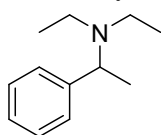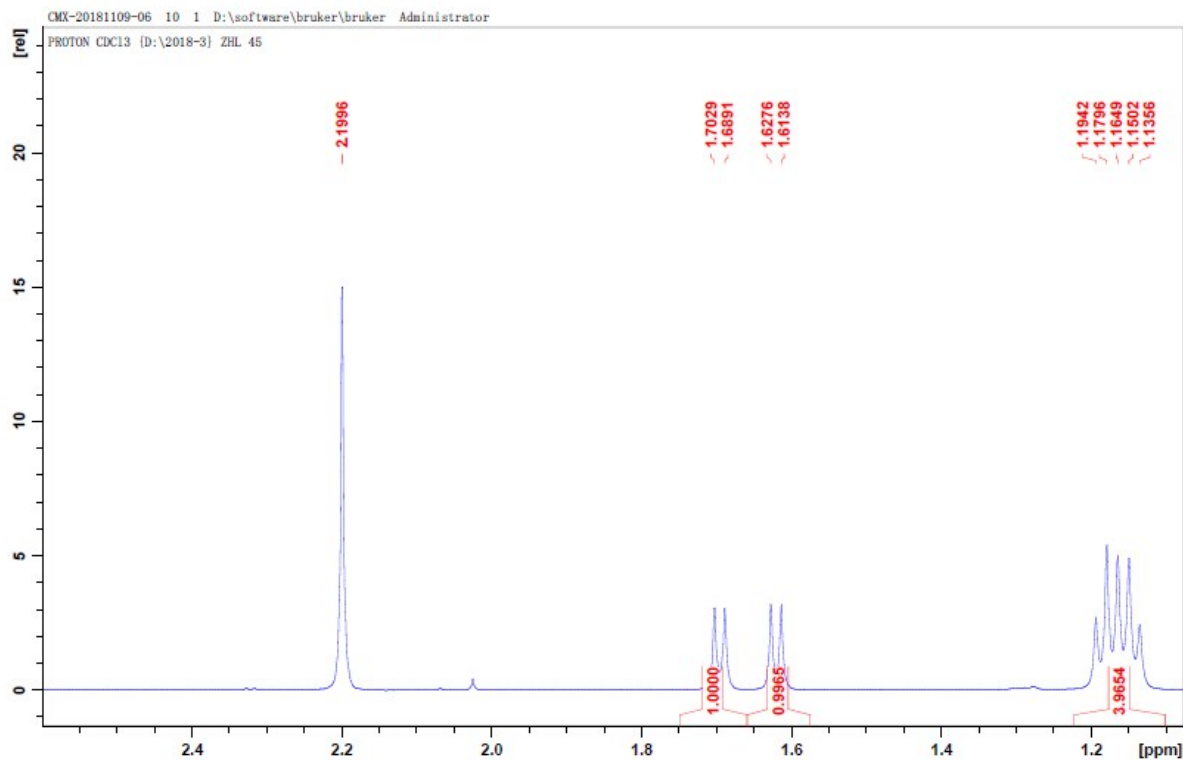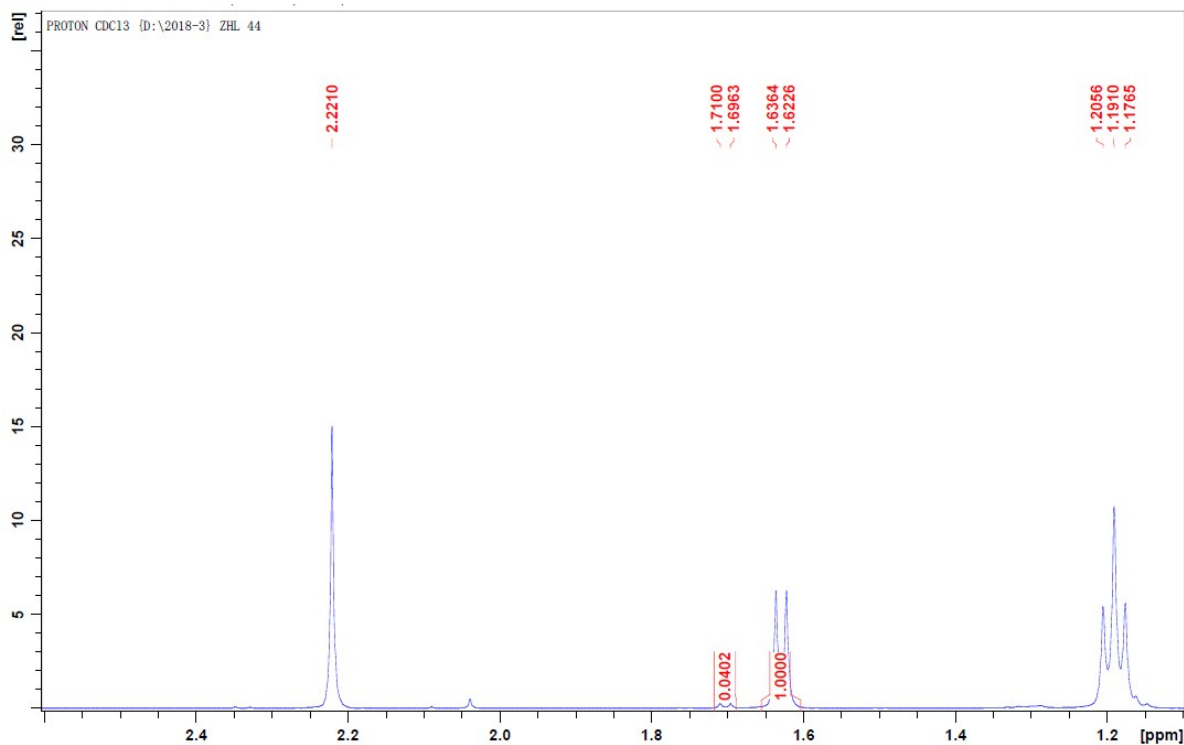

***N,N*-dipropyl-1-phenylethan-1-amine (3ae):**<sup>11</sup> 89% yield, 87% *ee*, brown oil. <sup>1</sup>H NMR (500 MHz, CDCl<sub>3</sub>): δ 7.40 (d, *J* = 7.5 Hz, 2H, Ar-CH), 7.34 (t, *J* = 7.4 Hz, 2H, Ar-CH), 7.25 (m, 1H, Ar-CH), 3.87 (q, *J* = 6.7 Hz, 1H, CH), 2.30-2.52 (m, 4H, 2\*N-CH<sub>2</sub>), 1.48 (m, *J* = 7.4 Hz, 4H, 2\*CH<sub>2</sub>), 1.36 (d, *J* = 6.8 Hz, 3H, CH<sub>3</sub>), 0.86 (t, *J* = 7.2 Hz, 6H, 2\*CH<sub>3</sub>); <sup>13</sup>C NMR (125 MHz, CDCl<sub>3</sub>): δ 145.3, 128.2, 127.9, 127.0, 59.9, 51.9, 20.2, 16.8, 11.8.

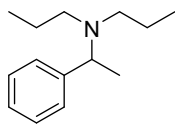

Enantiomeric excess was determined by <sup>1</sup>H NMR using (*S*)-2-acetoxy-2-phenylacetic acid as chemical shift reagent.

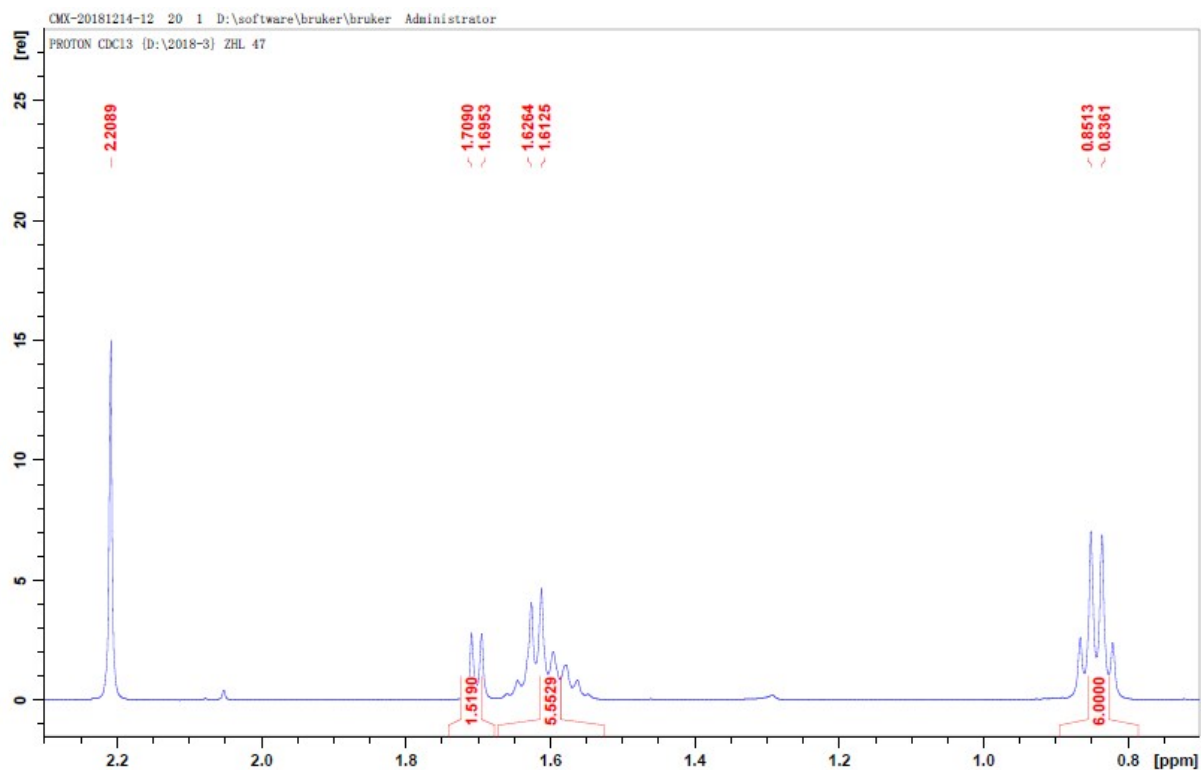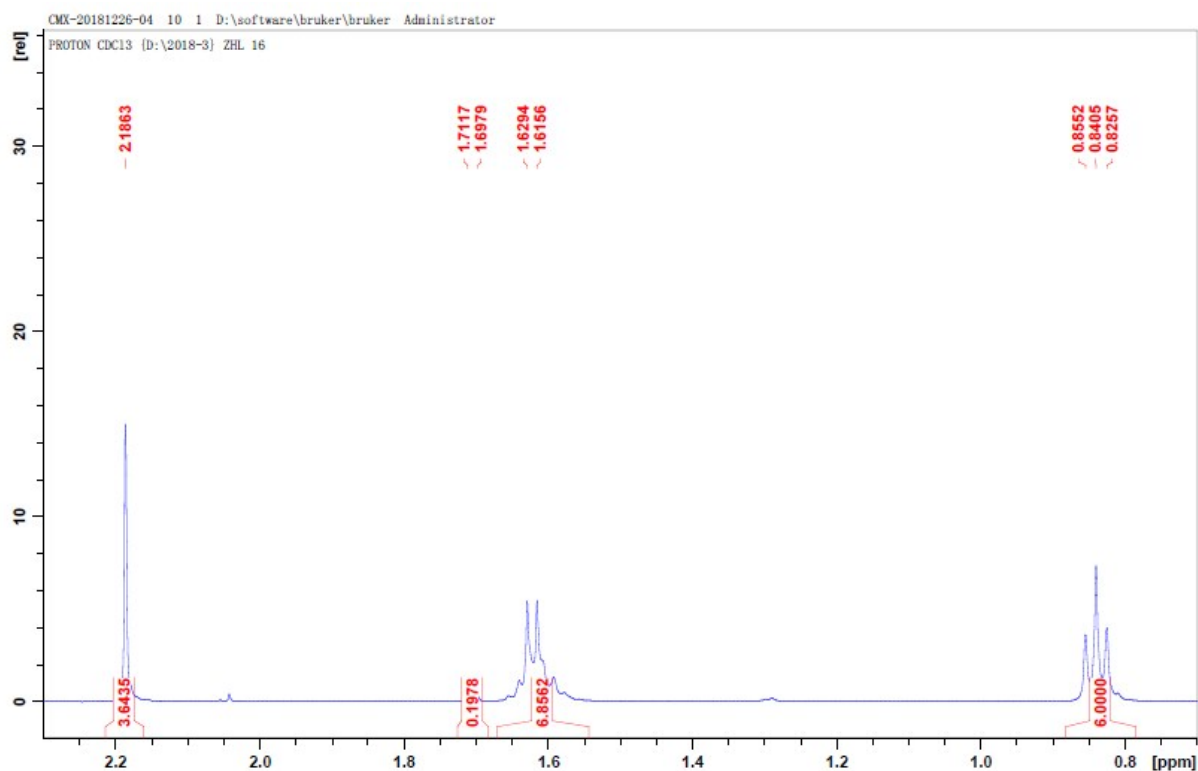

***N*-benzyl-*N*-methyl-1-phenylethan-1-amine (3af):** <sup>2</sup>92% yield, 93% *ee*, brown oil. <sup>1</sup>H NMR (500 MHz, CDCl<sub>3</sub>): δ 7.26-7.48 (m, 10H, Ar-CH), 3.68 (m, 1H, CH), 3.63 (m, 1H, CH<sub>2</sub>), 3.37 (m, 1H, CH<sub>2</sub>), 2.19 (m, 3H, N-CH<sub>3</sub>), 1.48 (m, 3H, CH<sub>3</sub>); <sup>13</sup>C NMR (125 MHz, CDCl<sub>3</sub>): δ 144.3, 140.2, 128.9, 128.3, 128.2, 127.8, 126.9, 126.8, 63.4, 59.0, 38.5, 18.5. Enantiomeric excess was determined by chiral HPLC: Chiralpak OJ-H column, Hex/IPA/TFA/DEA=90:10:0.2:0.1, 1 mL/min, 220 nm, 4.83 min, 5.15 min.

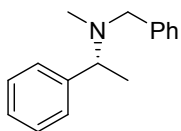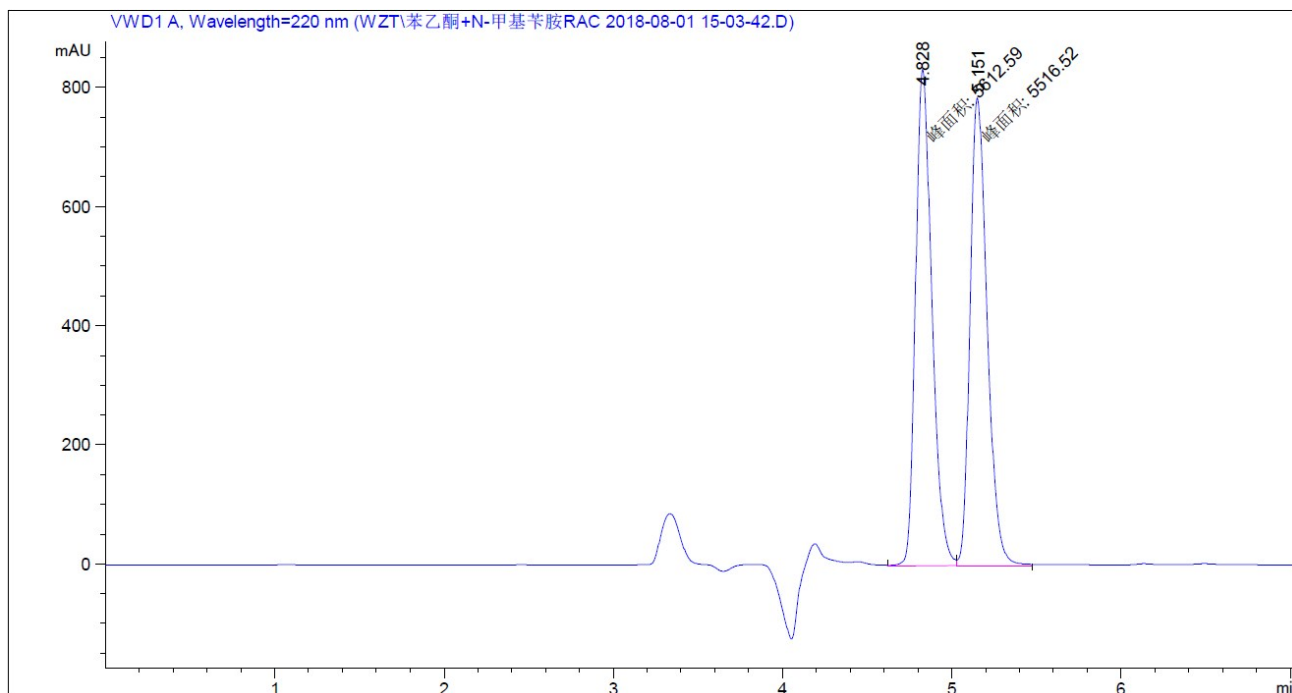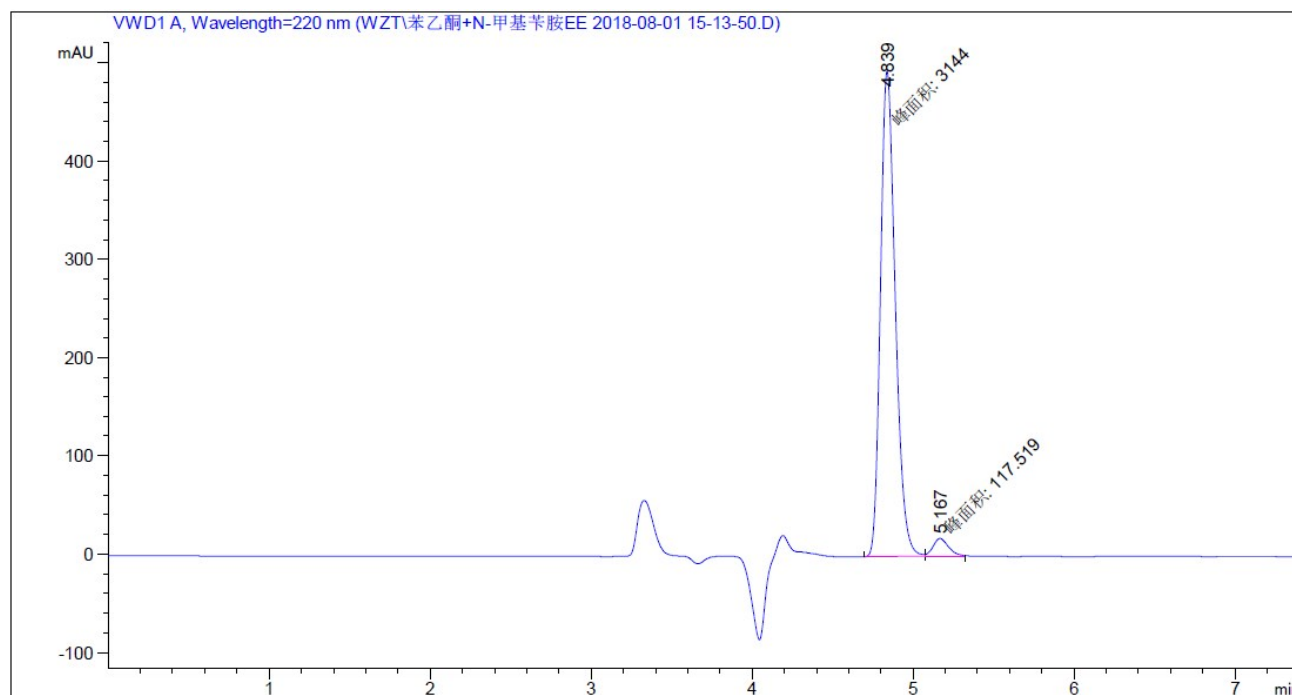

| # | [min] |    | [min]  | [mAU*s]    | [mAU]     | %       |
|---|-------|----|--------|------------|-----------|---------|
| 1 | 4.839 | MF | 0.1060 | 3143.99683 | 494.14529 | 96.3968 |
| 2 | 5.167 | FM | 0.1092 | 117.51907  | 17.94036  | 3.6032  |

***N*-(4-methoxybenzyl)-*N*-methyl-1-phenylethan-1-amine (3ag):**<sup>12</sup> 90% yield, 94% *ee*, brown oil. <sup>1</sup>H NMR (500 MHz, CDCl<sub>3</sub>): δ 7.46 (d, *J* = 7.3 Hz, 2H, Ar-CH), 7.38 (t, *J* = 7.0 Hz, 2H, Ar-CH), 7.28 (m, 3H, Ar-CH), 6.90 (d, *J* = 7.7 Hz, 2H, Ar-CH), 3.84 (s, 3H, O-CH<sub>3</sub>), 3.68 (q, *J* = 6.1 Hz, 1H, CH), 3.56 (d, *J* = 13 Hz, 1H, CH<sub>2</sub>), 3.30 (d, *J* = 13 Hz, 1H, CH<sub>2</sub>), 2.17 (s, 3H, N-CH<sub>3</sub>), 1.46 (d, *J* = 6.4 Hz, 3H, CH<sub>3</sub>); <sup>13</sup>C NMR (125 MHz, CDCl<sub>3</sub>): δ 158.5, 144.3, 132.1, 129.9, 128.2, 127.7, 126.8, 113.6, 63.1, 58.2, 55.3, 38.2, 18.4. Enantiomeric excess was determined by chiral HPLC: Chiralpak OJ-H column, Hex/IPA/DEA=97:3:0.1, 1 mL/min, 220 nm, 9.63 min, 10.78 min.

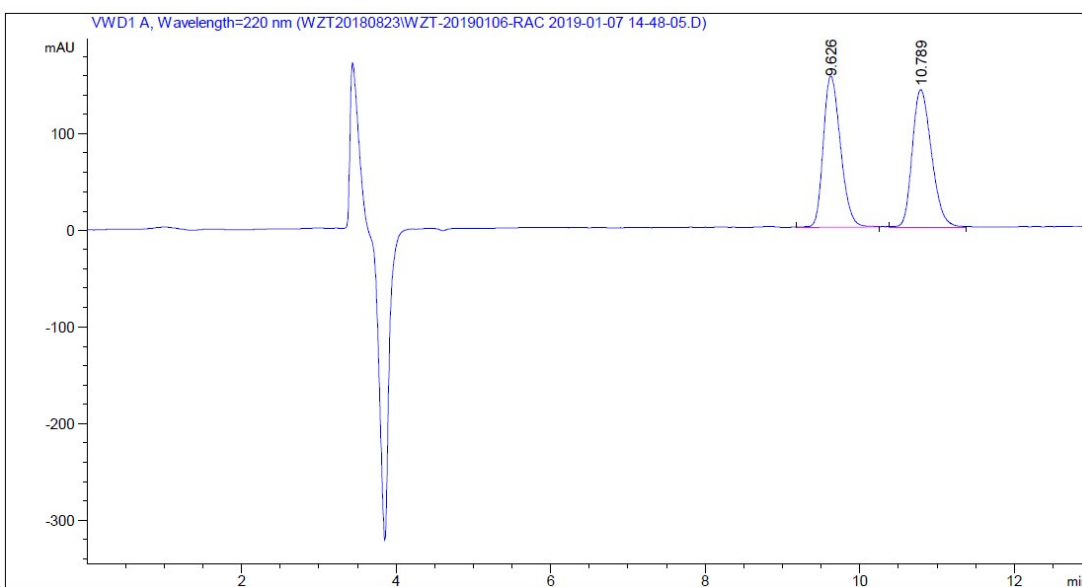

| # | [min]     | [min]  | [mAU*s]    | [mAU]     | %       |
|---|-----------|--------|------------|-----------|---------|
| 1 | 9.626 VV  | 0.2412 | 2416.86694 | 156.50574 | 49.6375 |
| 2 | 10.789 VV | 0.2684 | 2452.16968 | 142.04248 | 50.3625 |

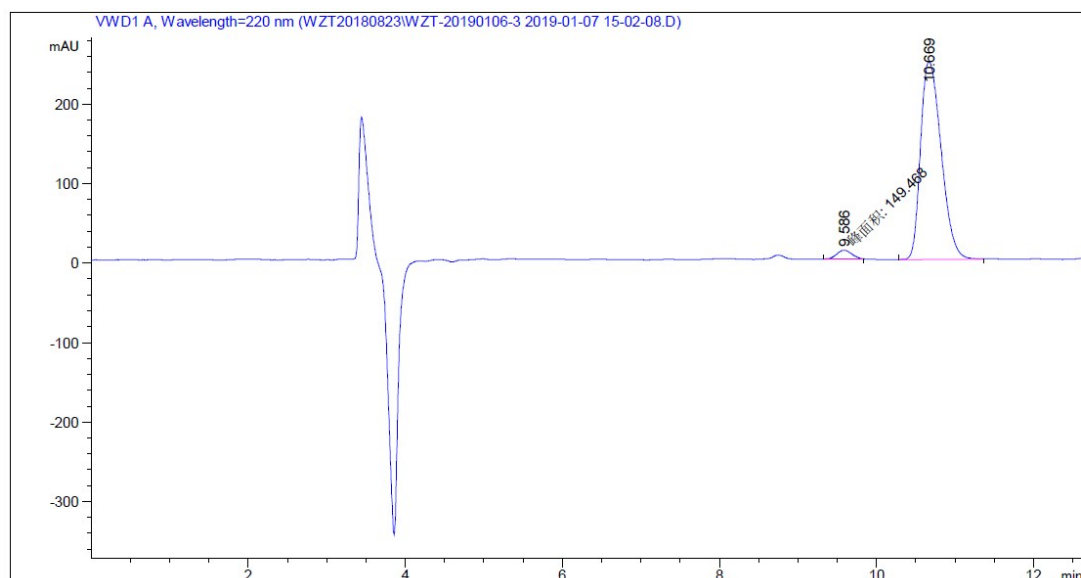

| # | [min]     | [min]  | [mAU*s]    | [mAU]     | %       |
|---|-----------|--------|------------|-----------|---------|
| 1 | 9.586 MM  | 0.2221 | 149.46837  | 11.21587  | 3.1838  |
| 2 | 10.669 VV | 0.2890 | 4545.12305 | 249.00073 | 96.8162 |

***N*-methyl-*N*-phenethyl-1-phenylethan-1-amine (3ah)**:<sup>13</sup> 96% yield, 96% *ee*, brown oil. <sup>1</sup>H NMR (500 MHz, CDCl<sub>3</sub>): δ 7.16-7.40 (m, 10H, Ar-CH), 3.70 (q, *J* = 6.7 Hz, 1H, CH), 2.60-2.90 (m, 4H, 2\*CH<sub>2</sub>), 2.37 (s, 3H, N-CH<sub>3</sub>), 1.44 (d, *J* = 6.8 Hz, 3H, CH<sub>3</sub>); <sup>13</sup>C NMR (125 MHz, CDCl<sub>3</sub>): δ 142.6, 140.1, 128.8, 128.4, 128.3, 127.9, 127.3, 126.1, 63.6, 56.2, 38.5, 33.3, 18.7. Enantiomeric excess was determined by chiral HPLC: Chiralpak OJ-3 column, Hex/IPA/DEA=97:3:0.1, 1 mL/min, 220 nm, 6.94 min, 7.41 min.

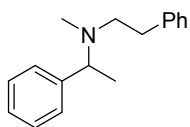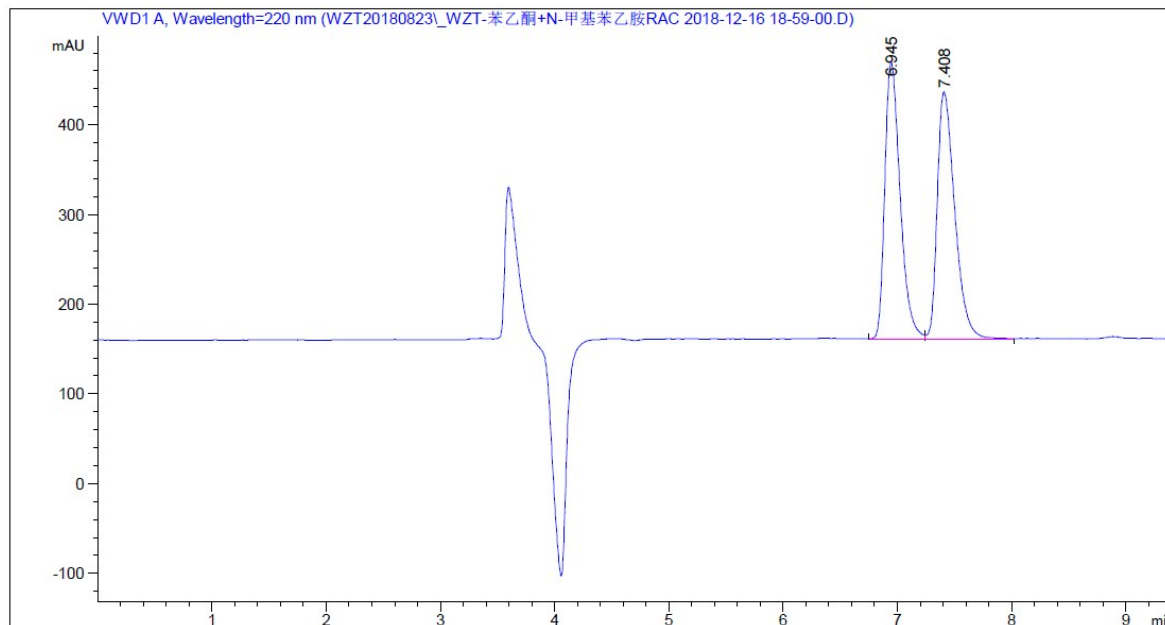

| # | [min]    | [min]  | [mAU*s]    | [mAU]     | %       |
|---|----------|--------|------------|-----------|---------|
| 1 | 6.945 BV | 0.1435 | 2868.82544 | 308.38168 | 49.5930 |
| 2 | 7.408 VB | 0.1637 | 2915.91235 | 275.07419 | 50.4070 |

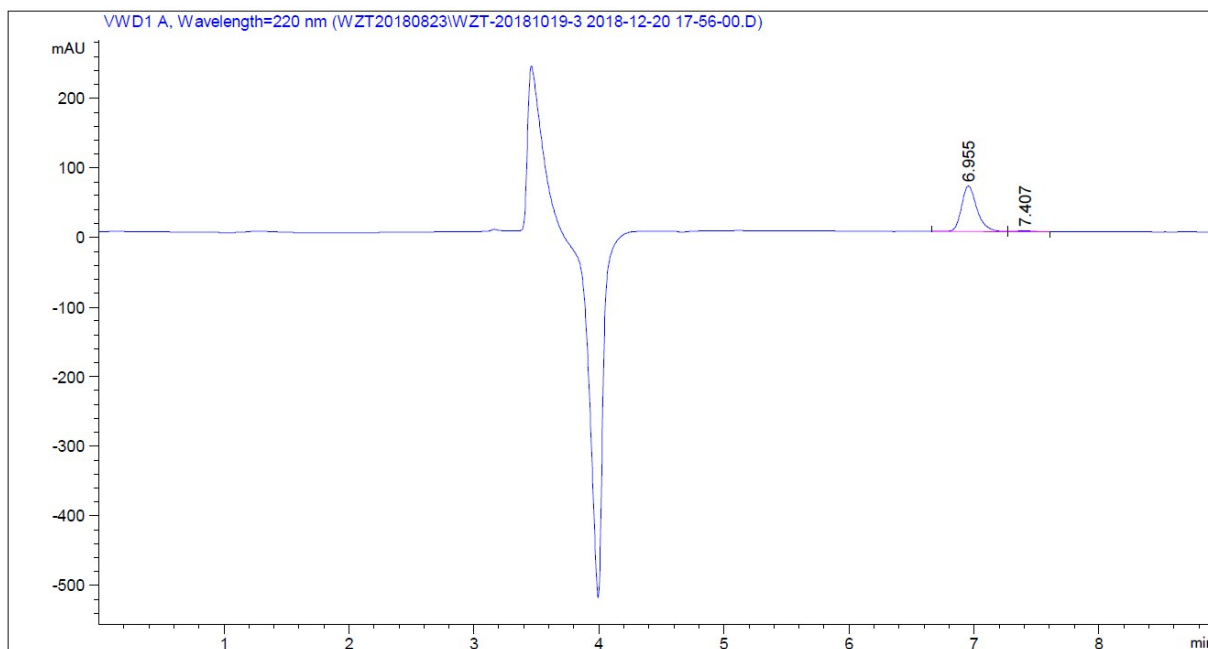

| # | [min]    | [min]  | [mAU*s]   | [mAU]    | %       |
|---|----------|--------|-----------|----------|---------|
| 1 | 6.955 BV | 0.1307 | 564.60931 | 65.42831 | 97.9282 |
| 2 | 7.407 VB | 0.1385 | 11.94481  | 1.33325  | 2.0718  |



***N*-methyl-*N*-phenpropyl-1-phenylethan-1-amine (3ai)**: 96% yield, 93% *ee*, brown oil.  $^1\text{H}$  NMR (500 MHz,  $\text{CDCl}_3$ ):  $\delta$  7.16-7.40 (m, 10H), 3.62 (q,  $J = 6.8$  Hz, 1H), 2.35-2.73 (m, 4H), 2.24 (s, 3H), 1.84 (m,  $J = 7.6$  Hz, 2H), 1.40 (d,  $J = 6.8$  Hz, 3H);  $^{13}\text{C}$  NMR (125 MHz,  $\text{CDCl}_3$ ):  $\delta$  144.12, 142.6, 128.4, 128.3, 128.1, 127.4, 126.7, 125.7, 63.3, 53.9, 38.4, 33.6, 29.0, 18.4. Enantiomeric excess was determined by  $^1\text{H}$  NMR using (*S*)-2-acetoxy-2-phenylacetic acid as chemical shift reagent.

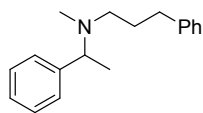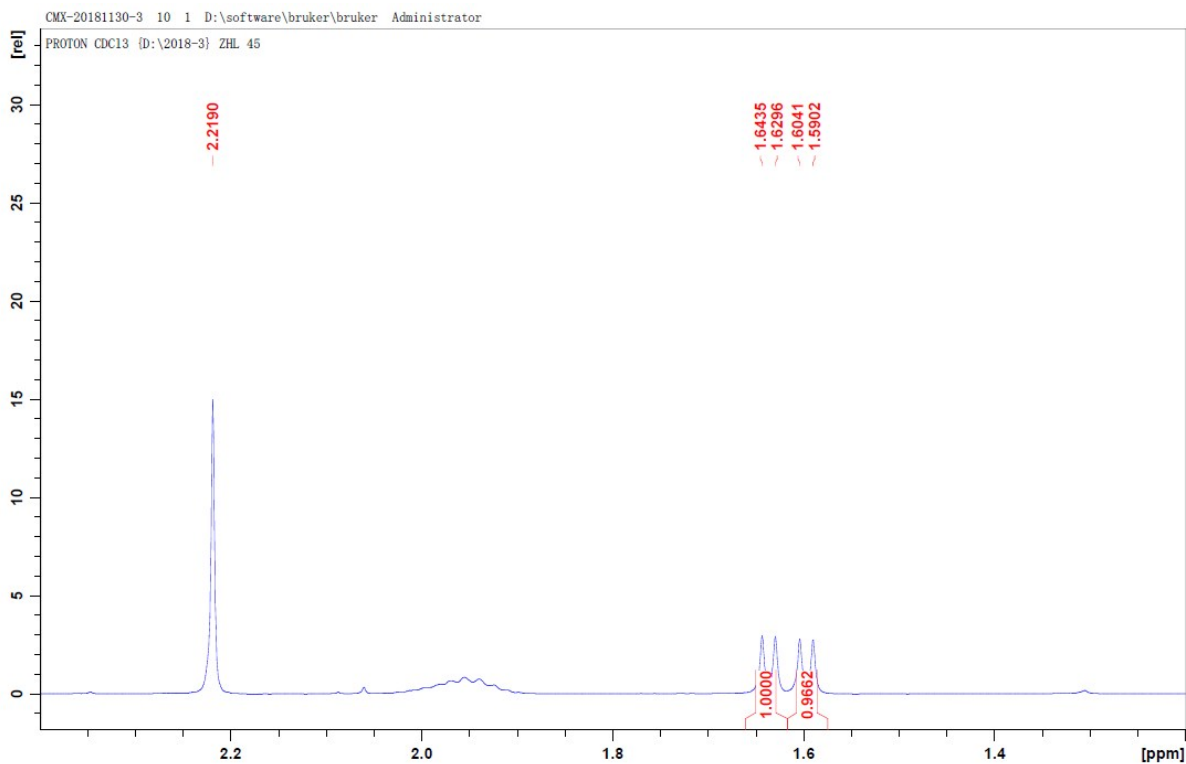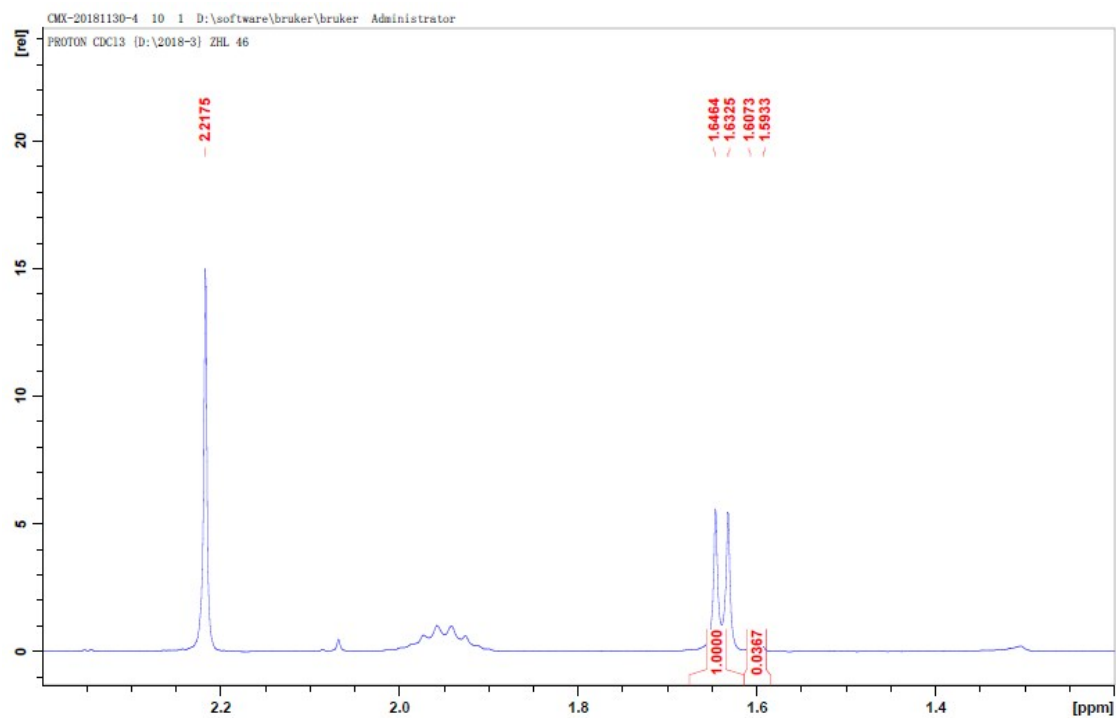

### III Procedure for the Synthesis of rivastigmine

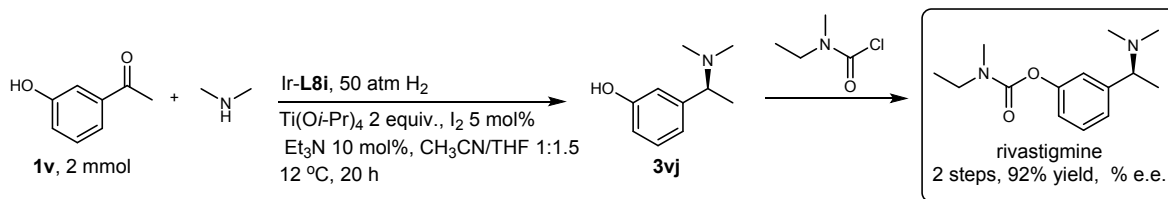

#### Step 1:

In a nitrogen-filled glovebox, the *in situ* generated complex Ir-L8i (20 μmol) was added to the vial charged with ketones (2 mmol) and dimethylamine in THF (2 mol/L, 2 mL, 4 mmol) in anhydrous acetonitrile solution (5.0 mL). Ti(O<sup>i</sup>Pr)<sub>4</sub> (2 equiv.), Et<sub>3</sub>N (0.1 eq), and I<sub>2</sub> (5 mol%) were added and the total solution was made to 15 mL at a ratio CH<sub>3</sub>CN/THF 1:1.5. The resulting vials were transferred to an autoclave, which was charged with 50 atm of H<sub>2</sub>, and stirred at 12 °C for 20 h. The hydrogen gas was released slowly and the solution was quenched with aqueous sodium bicarbonate solution. The organic phase was concentrated and passed through a short column of silica gel to remove the metal complex to give the crude products **3vj**, which were used in next step without purification.

#### Step 2:

NaOH (2.5 mmol) was added to the solution of **3vj** in CH<sub>3</sub>CN (15 mL). The the above solution was stirred for 1 h at room temperature, then ethyl(methyl)carbamate (2.2 mmol) was added. The reaction mixture was stirred for 12 h, quenched by aq. NH<sub>4</sub>Cl solution. CH<sub>3</sub>CN was removed under vacuum and the solution was extracted by EtOAc (15 mL\*3). The organic phase was dried over anhydrous Na<sub>2</sub>SO<sub>4</sub>, concentrated and purified with column chromatography (EtOAc/PE) to give rivastigmine (461 mg, 92% yield for 2 steps).

**(S)-3-[1-(Dimethylamino)ethyl]phenyl Ethyl-(methyl)carbamate (Rivastigmine):**<sup>10</sup> 93% yield for 2 steps, 91% *ee*, brown oil. <sup>1</sup>H NMR (500 MHz, CDCl<sub>3</sub>): δ 7.32 (t, *J* = 7.9 Hz, 1H), 7.15 (d, *J* = 7.7 Hz, 1H), 7.10 (m, 1H), 7.05 (m, 1H), 3.50 (dq, *J* = 6.7 Hz, 31.2 Hz, 2H), 3.28 (t, *J* = 6.7 Hz, 1H), 3.05 (d, *J* = 37.2 Hz, 1H), 2.24 (s, 6H), 1.39 (d, *J* = 6.7 Hz, 3H), 1.27 (dt, *J* = 7.7 Hz, 26.9 Hz, 3H); <sup>13</sup>C NMR (125 MHz, CDCl<sub>3</sub>): δ 154.6, 151.6, 145.8, 128.9, 124.2, 120.7, 120.3, 65.6, 44.0, 43.2, 34.2, 33.8, 20.1, 13.2, 12.5. HRMS (ESI) *m/z* calcd for C<sub>14</sub>H<sub>23</sub>N<sub>2</sub>O<sub>2</sub><sup>+</sup> [M+H]<sup>+</sup> 251.17540, found 251.17538. Enantiomeric excess was determined by chiral HPLC: Chiralpak OD-H column, Hex/IPA/TFA/DEA = 92:8:0.2:0.1, 1 mL/min, 220 nm, 11.74 min, 17.02 min.

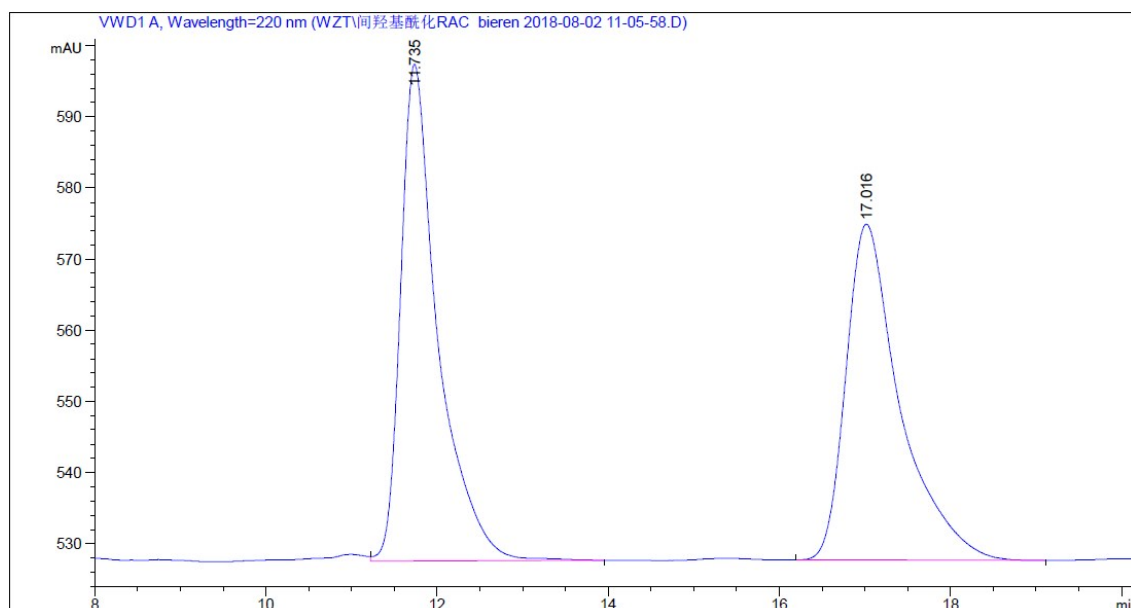

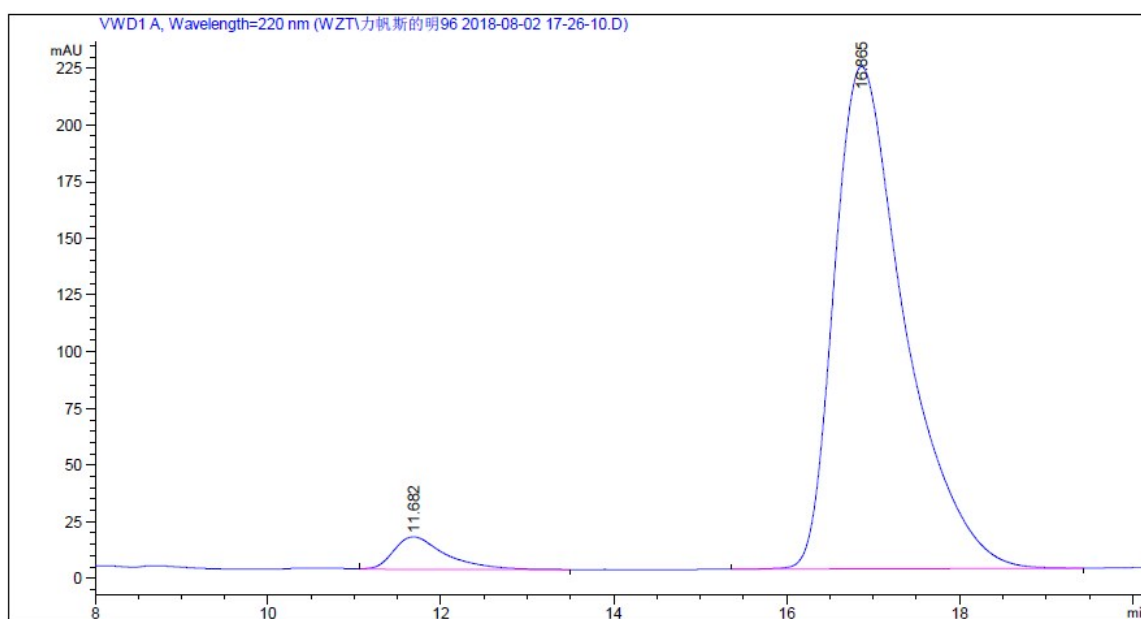

| # | [min]  | [min] | [mAU*s] | [mAU]     | %         |         |
|---|--------|-------|---------|-----------|-----------|---------|
| 1 | 11.682 | VB    | 0.6138  | 598.98987 | 14.35594  | 4.5502  |
| 2 | 16.865 | VB    | 0.8506  | 1.25651e4 | 221.56683 | 95.4498 |

#### IV Debenzylation of **3ae**

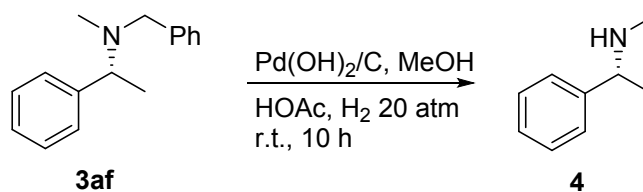

$\text{Pd(OH)}_2$  on carbon (10%, 4.5 mg) was added to the solution of (*R*)-**3af** (45 mg, 0.2 mmol) and acetic acid (1 drop) in MeOH (2 mL). The resulting mixture was transferred to an autoclave, which was charged with 20 atm of  $\text{H}_2$ , and stirred at r.t. for 10 h. The hydrogen gas was released slowly and the solution was filter and quenched with aqueous sodium bicarbonate solution. The organic phase was concentrated and passed through a short column of silica gel to remove the metal complex to give the crude product, which was purified with column chromatography to afford **4** (26 mg, 95% yield).

(*R*)-*N*-methyl-1-phenylethan-1-amine (**4**):<sup>11</sup> 26 mg, 95% yield, 93% *ee*, colorless oil.  $^1\text{H NMR}$  (500 MHz,  $\text{CDCl}_3$ ):  $\delta$  7.27-7.36 (m, 4H, Ar-CH), 7.23 (m, 1H, Ar-CH), 3.67 (q,  $J = 6.6$  Hz, 1H, CH), 2.34 (s, 3H, N- $\text{CH}_3$ ), 1.86 (bs, 1H, NH), 1.39 (d,  $J =$

6.7 Hz, 3H, CH<sub>3</sub>). Enantiomeric excess was determined for the corresponding acetamide by chiral HPLC: Chiralpak AD-H column, Hex/IPA=97:3, 1 mL/min, 220 nm, 12.3 min (major), 13.6 min (minor).

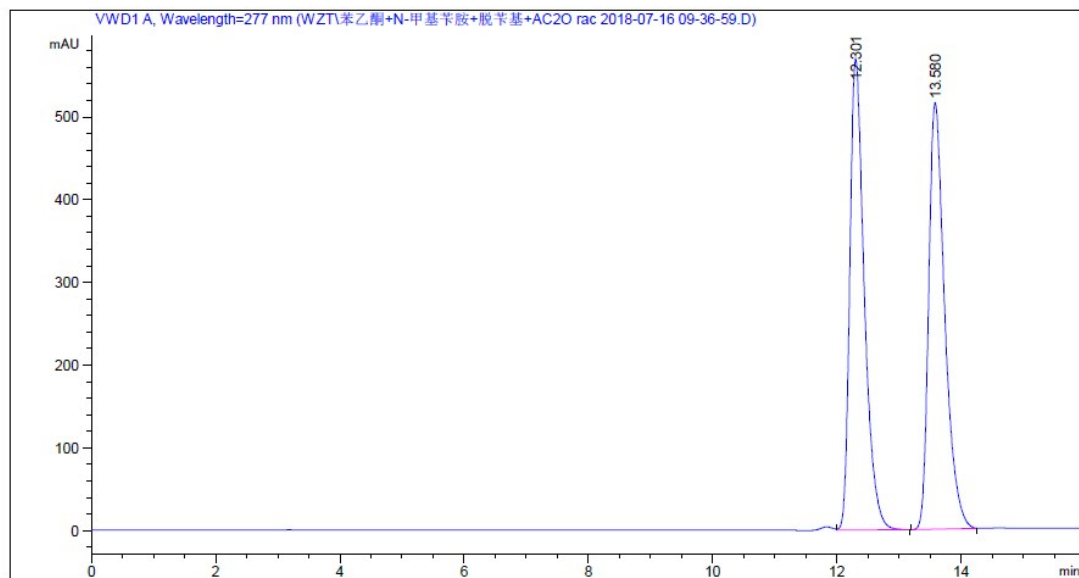

| # | [min]     | [min]  | [mAU*s]    | [mAU]     | %       |
|---|-----------|--------|------------|-----------|---------|
| 1 | 12.301 VB | 0.2451 | 9230.26953 | 569.60980 | 49.9640 |
| 2 | 13.580 BB | 0.2712 | 9243.55957 | 515.57379 | 50.0360 |

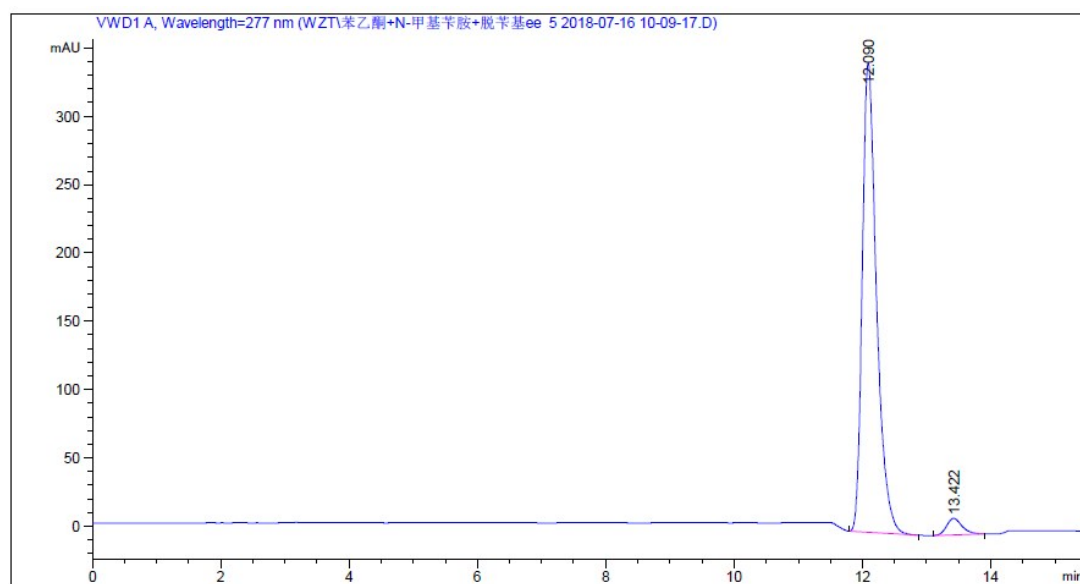

| # | [min]     | [min]  | [mAU*s]    | [mAU]     | %       |
|---|-----------|--------|------------|-----------|---------|
| 1 | 12.090 BB | 0.2338 | 5299.50635 | 343.80060 | 96.3059 |
| 2 | 13.422 BB | 0.2532 | 203.27594  | 12.14922  | 3.6941  |

## V Mechanistic study

### 1. $^{31}\text{P}$ spectra.

$^{31}\text{P}$  NMR for **L9i** (202 MHz,  $\text{CDCl}_3$ ):  $\delta$  147.5;

$^{31}\text{P}$  NMR for Ir:**L9i** 1:1 (202 MHz,  $\text{CDCl}_3$ ):  $\delta$  113.2;

$^{31}\text{P}$  NMR for Ir:**L9i** 1:2 (202 MHz,  $\text{CDCl}_3$ ):  $\delta$  147.5, 113.2;

### 2. Deuterium incorporation study for the DARA of **1a** with **2h**.

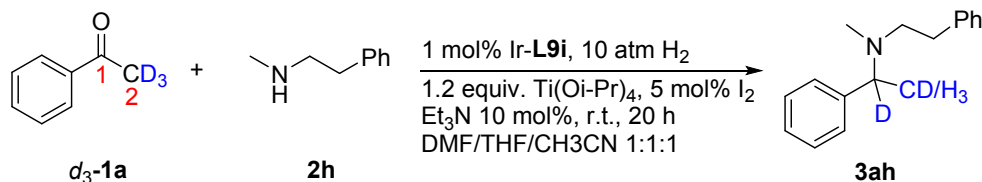

*N*-methyl-*N*-phenethyl-1-phenylethan-1-amine-*d* (**3ah**):<sup>13</sup> 82% yield, 94% *ee*, brown oil.  $^1\text{H}$  NMR (500 MHz,  $\text{CDCl}_3$ ):  $\delta$  7.16-7.40 (m, 10H), 3.70 (q,  $J = 6.7$  Hz, 0.93H), 2.60-2.90 (m, 4H), 2.37 (s, 3H), 1.44 (m,  $J = 6.8$  Hz, 1.76H).

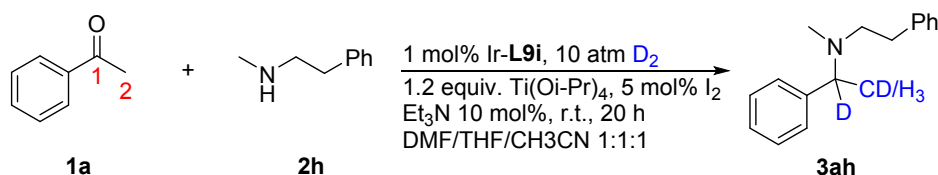

*N*-methyl-*N*-phenethyl-1-phenylethan-1-amine-*d* (**3ah**):<sup>13</sup> 82% yield, 94% *ee*, brown oil.  $^1\text{H}$  NMR (500 MHz,  $\text{CDCl}_3$ ):  $\delta$  7.16-7.40 (m, 10H), 3.70 (q,  $J = 6.7$  Hz, 0.28H), 2.60-2.90 (m, 4H), 2.37 (s, 3H), 1.44 (m,  $J = 6.8$  Hz, 1.16H).

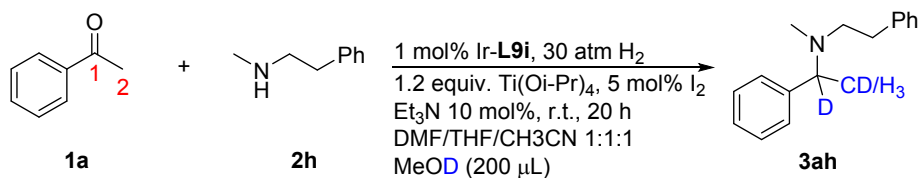

*N*-methyl-*N*-phenethyl-1-phenylethan-1-amine-*d* (**3ah**):<sup>13</sup> 67% yield, 93% *ee*, brown oil.  $^1\text{H}$  NMR (500 MHz,  $\text{CDCl}_3$ ):  $\delta$  7.16-7.40 (m, 10H), 3.70 (q,  $J = 6.7$  Hz, 0.81H), 2.60-2.90 (m, 4H), 2.37 (s, 3H), 1.44 (m,  $J = 6.8$  Hz, 0.66 H).

## VI References:

1. a) L. Lefort, J. A. F. Boogers, A. H. M. de Vries, J. G. de Vries, *Org. Lett.* **2004**, *6*, 1733. b) C. R. Smith, D. J. Mans and T. V. RajanBabu, *Org. Synth.* **2008**, *85*, 238-247. c) B. Wang, X. Feng, Y. Huang, H. Liu, X. Cui, Y. Jiang, *J. Org. Chem.* **2002**, *67*, 2175. d) C. R. Graves, H. Zhou, C. L. Stern, S. T. Nguyen, *J. Org. Chem.* **2007**, *72*, 9121. e) W. Zhao, T. Wang, R. Zhao, H. Xie, L. Liu, *Tetrahedron: Asymmetry*, **2016**, *27*, 157.
2. N. E. Lee, S. L. Buchwald, *J. Am. Chem. Soc.* **1994**, *116*, 5985.
3. P. Yan, J. Xie, Q. Zhou, *Chin. J. Chem.* **2010**, *28*, 1736.
4. H. Kleijn, E. Rijnberg, J. T. B. H. Jastrzebski, G. van Koten, *Org. Lett.* **1999**, *1*, 853.
5. S. E. Varjosaari, V. Skrypai, P. Suating, J. J. M. Hurley, A. M. De Lio, T. M. Gilbert, M. J. Adler, *Adv. Synth. Catal.* **2017**, *359*, 1872.
6. A. Tarasewicz, D. Ensan, R. A. Batey, *Chem. Eur. J.* **2018**, *24*, 6071.
7. M. Lindqvist, K. Borre, K. Axenov, B. Kótai, M. Nieger, M. Leskelä, I. Pápai, T. Repo, *J. Am. Chem. Soc.* **2015**, *137*, 4038-4041.
8. R. V. Heinzelman, B. D. Aspergeen, *J. Am. Chem. Soc.* **1953**, *75*, 3409.
9. H. Guan, M. Imura, M. P. Magee, J. R. Norton, G. Zhu, *J. Am. Chem. Soc.* **2005**, *127*, 7805-7814.
10. L. Benmekhbi, F. Louafi, T. Roisnel, J.-P. Hurvois, *J. Org. Chem.* **2016**, *81*, 6721-6739.
11. R. J. W. Schuurman, A. d. Linden, R. P. F. Grimbergen, R. J. M. Nolte, H. W. Scheeren, *Tetrahedron*, **1996**, *52*, 8307-8314.
12. R. Baltzly, P. B. Russell, *J. Am. Chem. Soc.* **1953**, *75*, 5598.
13. P. Blaney, R. Grigg, Z. Rankovic, M. Thoroughgood, *Tetrahedron Lett.* **2000**, *41*, 6639-6642.
14. P.-C. Yan, G.-L. Zhu, J.-H. Xie, X.-D. Zhang, Q.-L. Zhou, Y.-Q. Li, W.-H. Shen, D.-Q. Che, *Org. Process Res. Dev.* **2013**, *17*, 307.
15. V. N. Wakchaure, P. S. J. Kaib, M. Leutzsch, B. List, *Angew. Chem. Int. Ed.* **2015**, *54*, 11852.

## VII NMR & HRMS Spectra

PROTON CDC13 3a

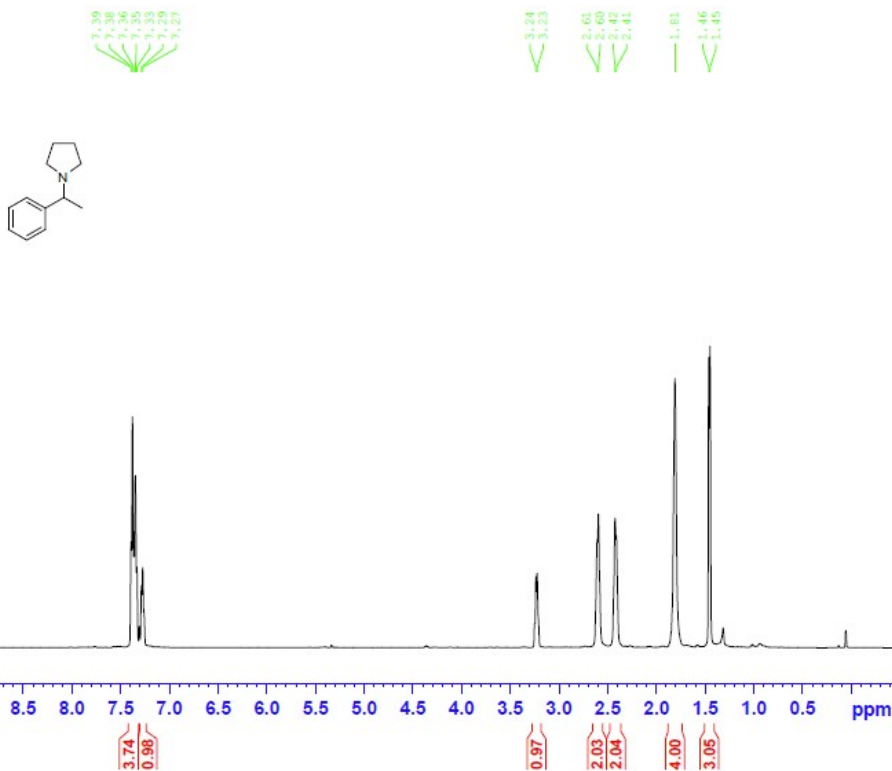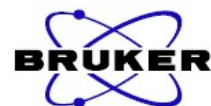

```

NAME      cmx-20180511-1
EXPNO    10
PROCNO   1
Date_    20180511
Time_    11.21
INSTRUM  spect
PROBHD   5 mm PABBO BB-
PULPROG  zg30
TD        65536
SOLVENT  CDCl3
NS        11
DS        2
SWH       10330.578 Hz
FIDRES   0.157632 Hz
AQ        3.1719923 sec
RG        50.8
CW        48.400 usec
DE        6.50 usec
TE        301.0 K
D1        1.00000000 sec
TDO       1
  
```

```

===== CHANNEL f1 =====
NUC1      1H
P1        12.60 usec
PL1       0.00 dB
PL1W     18.83080864 W
SFO1     500.1330885 MHz
SI        32768
SF        500.1300000 MHz
WDW       EM
SSB       0
LB        0.30 Hz
GB        0
PC        1.00
  
```

C13CPD CDC13 3a

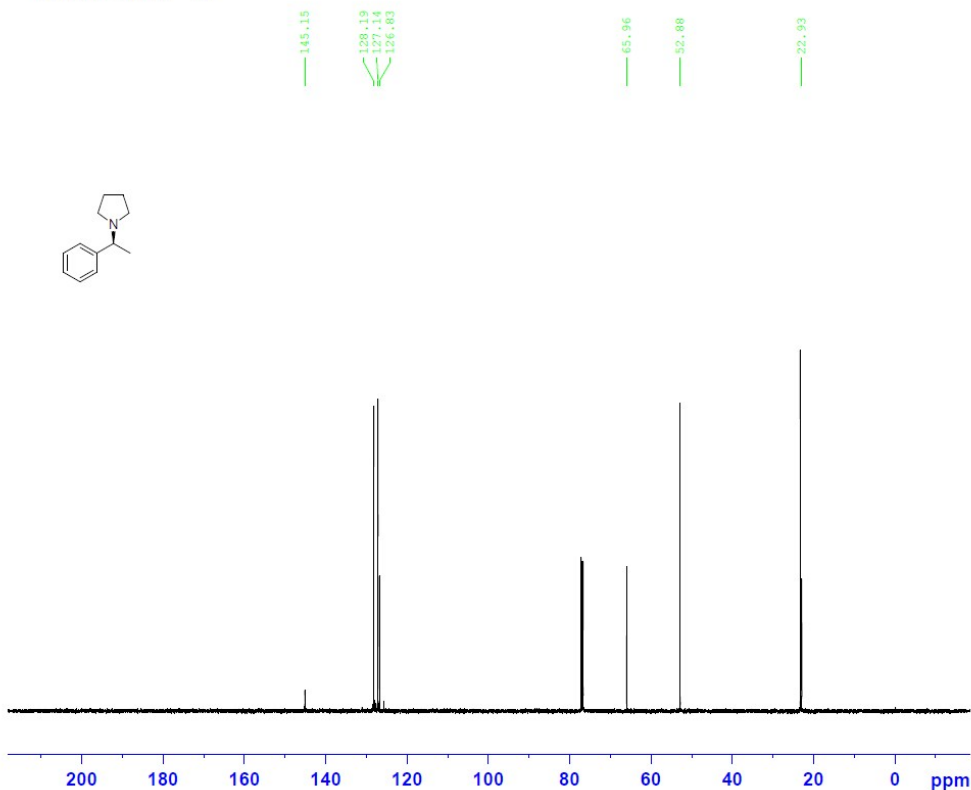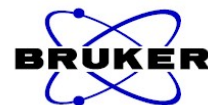

```

NAME      CMX-20190227-1
EXPNO    10
PROCNO   1
Date_    20190227
Time_    16.42
INSTRUM  spect
PROBHD   5 mm PABBO BB-
PULPROG  zgpg30
TD        65536
SOLVENT  CDCl3
NS        84
DS        4
SWH       29761.904 Hz
FIDRES   0.454131 Hz
AQ        1.1010548 sec
RG        203
CW        16.800 usec
DE        6.50 usec
TE        297.5 K
D1        2.00000000 sec
D11      0.03000000 sec
TDO       1
  
```

```

===== CHANNEL f1 =====
NUC1      13C
P1        9.50 usec
PL1       -1.00 dB
PL1W     112.80287170 W
SFO1     125.7703643 MHz
  
```

```

===== CHANNEL f2 =====
CPDPRG2  waltz16
NUC2      1H
PCPD2    80.00 usec
PL2       0.00 dB
PL12     16.05 dB
PL13     17.00 dB
PL2W     18.83080864 W
PL12W    0.46758412 W
PL13W    0.37572402 W
SFO2     500.1320005 MHz
SI        32768
SF        125.7578077 MHz
WDW       EM
SSB       0
LB        1.00 Hz
GB        0
PC        1.40
  
```

PROTON CDC13 3b

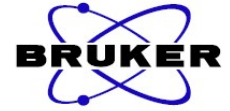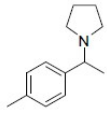

7.28  
7.27  
7.17  
7.16

3.23  
3.22  
3.20  
3.19  
3.19  
2.61  
2.60  
2.59  
2.59  
2.58  
2.58  
2.44  
2.43  
2.42  
2.42  
2.41  
2.38  
2.38  
1.81  
1.81  
1.80  
1.80  
1.45  
1.44

NAME CMX-20170919-3  
EXPNO 10  
PROCNO 1  
Date\_ 20170919  
Time 11.41  
INSTRUM spect  
PROBHD 5 mm FAPBO BB-  
PULPROG zg30  
TD 65536  
SOLVENT CDCl3  
NS 16  
DS 2  
SWH 10330.578 Hz  
FIDRES 0.157632 Hz  
AQ 3.1719923 sec  
RG 40.3  
DW 48.400 usec  
DE 6.50 usec  
TE 303.4 K  
D1 1.00000000 sec  
TDO 1

===== CHANNEL f1 =====  
NUC1 1H  
P1 12.60 usec  
PL1 0.00 dB  
PL1W 18.83080864 W  
SFO1 500.1330885 MHz  
SI 32768  
SF 500.1300000 MHz  
WDW EM  
SSB 0  
LB 0.30 Hz  
GB 0  
PC 1.00

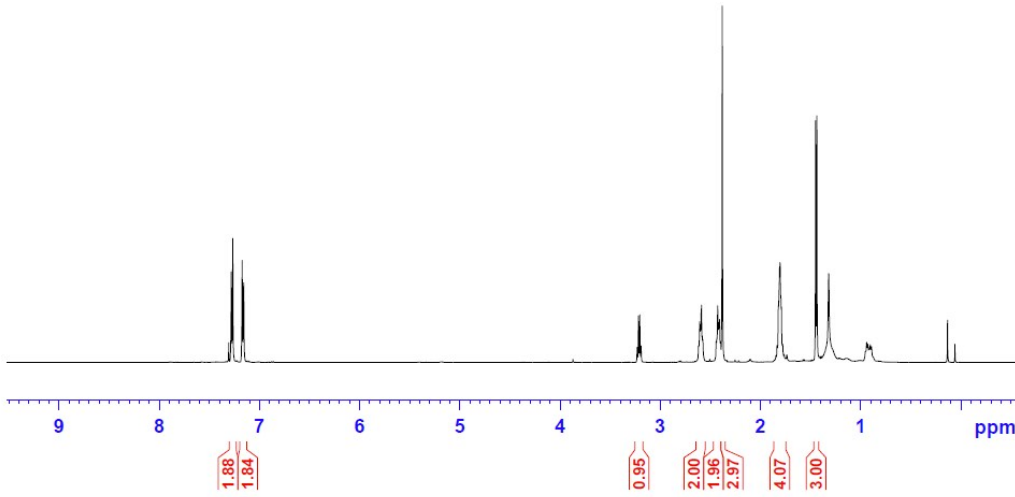

C13CPD CDC13 3b

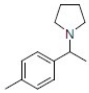

141.09  
136.91  
129.14  
127.32

77.39  
77.13  
76.88

65.80  
52.93

23.42  
22.66  
21.13

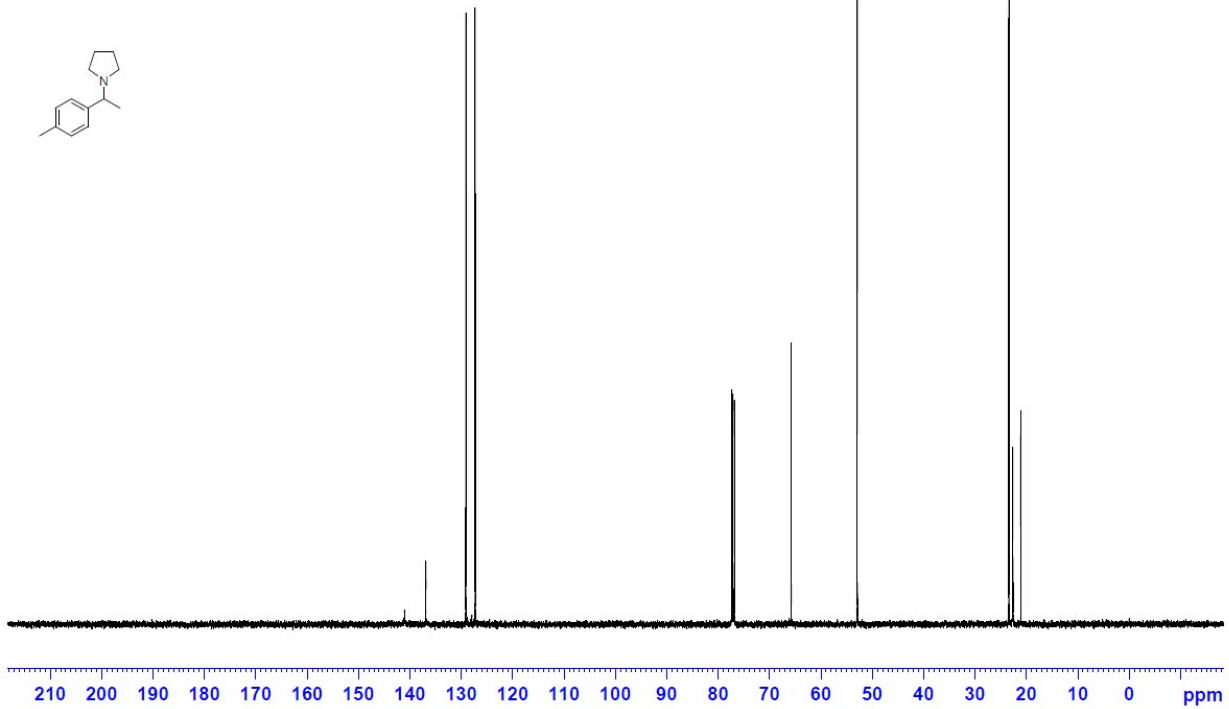



PROTON CDC13 3c

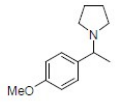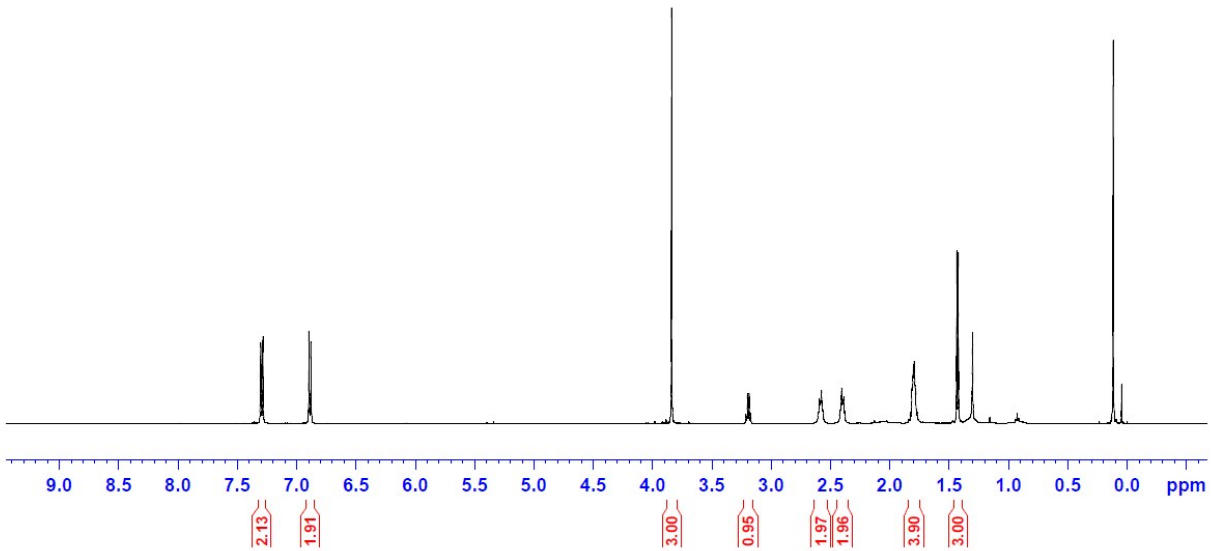

C13CPD CDC13 3c

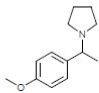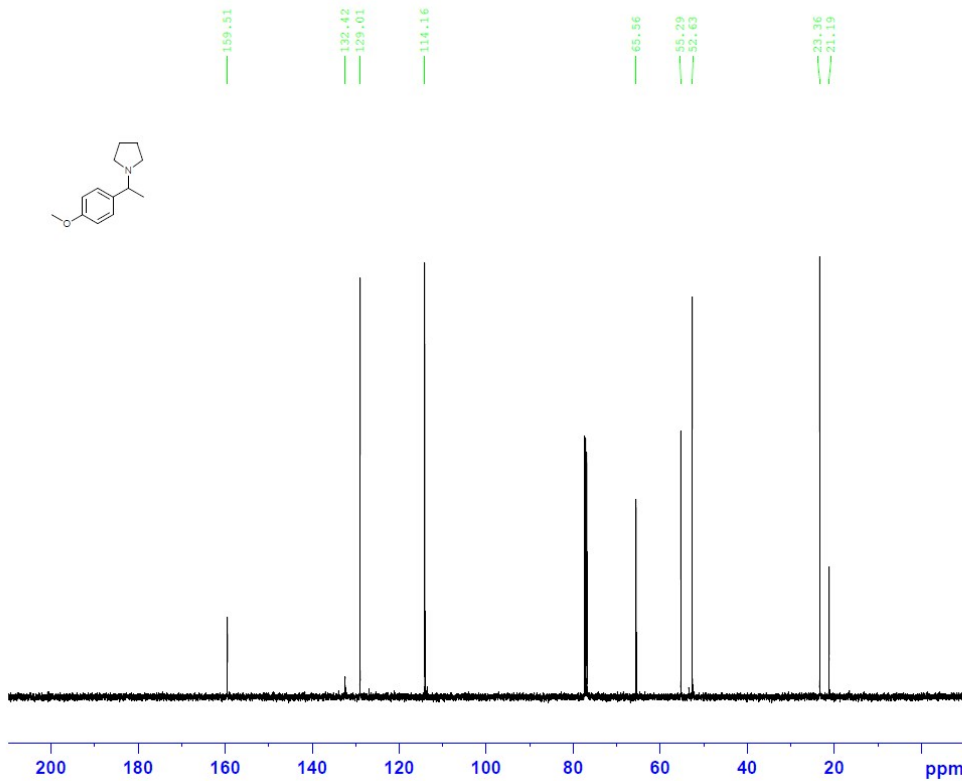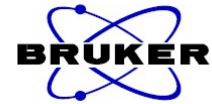

```
NAME CMX-20190225-3
EXPNO 11
PROCNO 1
Date_ 20190225
Time 11.49
INSTRUM spect
PROBHD 5 mm PABBO BB-
PULPROG zgpg30
TD 65536
SOLVENT cdcl3
NS 64
DS 4
SWH 29761.904 Hz
FIDRES 0.454131 Hz
AQ 1.1010548 sec
RG 203
DW 16.800 usec
DE 6.50 usec
TE 300.0 K
D1 2.00000000 sec
D11 0.03000000 sec
TD0 1

===== CHANNEL f1 =====
NUC1 13C
P1 9.50 usec
PL1 -1.00 dB
PL1W 112.80287170 W
SFO1 125.7703643 MHz

===== CHANNEL f2 =====
CPDPRG2 waltz16
NUC2 1H
PCPD2 80.00 usec
PL2 0.00 dB
PL12 16.05 dB
PL13 17.00 dB
PL2W 18.83080864 W
PL12W 0.46759412 W
PL13W 0.37572402 W
SFO2 500.1320005 MHz
SI 32768
SF 125.7577690 MHz
WDW EM
SSB 0
LB 1.00 Hz
GB 0
PC 1.40
```

PROTON CDC13 3d

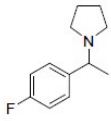

7.33  
7.34  
7.34  
7.33  
7.32  
7.32  
7.31  
7.04  
7.02  
7.00

3.23  
3.22  
3.20  
3.18  
3.18  
2.98  
2.97  
2.97  
2.96  
2.56  
2.40  
2.39  
2.38  
2.38  
1.81  
1.80  
1.80  
1.79  
1.79  
1.78  
1.41  
1.41

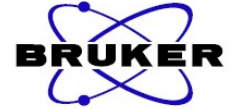

NAME CMX-20170919-9  
EXPNO 10  
PROCNO 1  
Date\_ 20170919  
Time 11.46  
INSTRUM spect  
PROBHD 5 mm PABBO BB-  
PULPROG zg30  
TD 65536  
SOLVENT CDC13  
NS 16  
DS 2  
SWH 10330.578 Hz  
FIDRES 0.157632 Hz  
AQ 3.1719923 sec  
RG 71.8  
DW 48.400 usec  
DE 6.50 usec  
TE 303.4 K  
D1 1.00000000 sec  
TD0 1

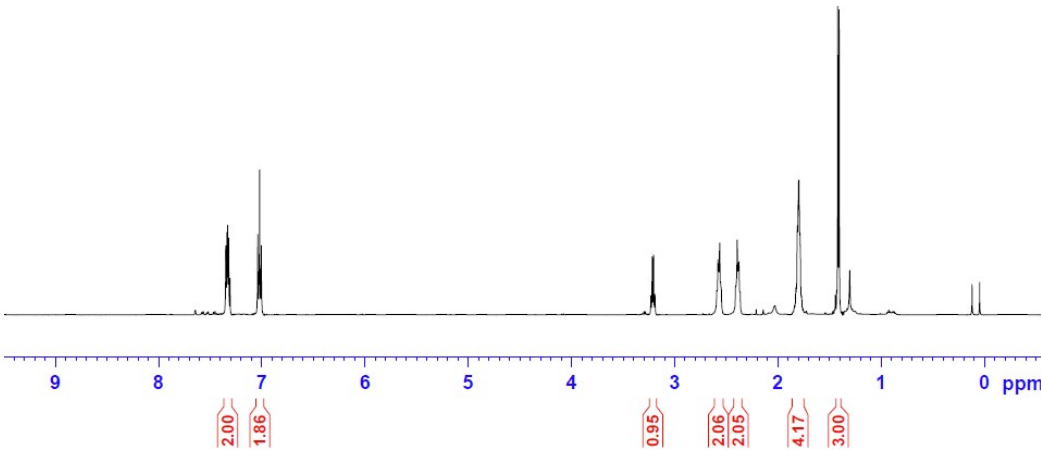

===== CHANNEL f1 =====  
NUC1 1H  
P1 12.60 usec  
PL 0.00 dB  
PLW 18.83080864 W  
SFO1 500.1330885 MHz  
SI 32768  
SF 500.1300000 MHz  
WDW EM  
SSB 0  
LB 0.30 Hz  
GB 0  
PC 1.00

C13CPD CDC13 3d

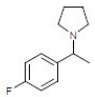

162.85  
160.91

128.77  
128.70

115.21  
115.04

65.31

55.93

23.43  
22.96

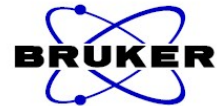

NAME CMX-20190225-4  
EXPNO 11  
PROCNO 1  
Date\_ 20190225  
Time 16.38  
INSTRUM spect  
PROBHD 5 mm PABBO BB-  
PULPROG zgpg30  
TD 65536  
SOLVENT CDC13  
NS 64  
DS 4  
SWH 29761.904 Hz  
FIDRES 0.454131 Hz  
AQ 1.1010548 sec  
RG 203  
DW 16.800 usec  
DE 6.50 usec  
TE 300.2 K  
D1 2.00000000 sec  
D11 0.03000000 sec  
TD0 1

===== CHANNEL f1 =====  
NUC1 13C  
P1 9.50 usec  
PL -1.00 dB  
PLW 112.80287170 W  
SFO1 125.7703643 MHz

===== CHANNEL f2 =====  
CFDPRG2 waltz16  
NUC2 1H  
PCPD2 80.00 usec  
PL2 0.00 dB  
PL12 16.05 dB  
PL13 17.00 dB  
PL2W 18.83080864 W  
PL12W 0.46759412 W  
PL13W 0.37572402 W  
SFO2 500.1320005 MHz  
SI 32768  
SF 125.7577890 MHz  
WDW EM  
SSB 0  
LB 1.00 Hz  
GB 0  
PC 1.40

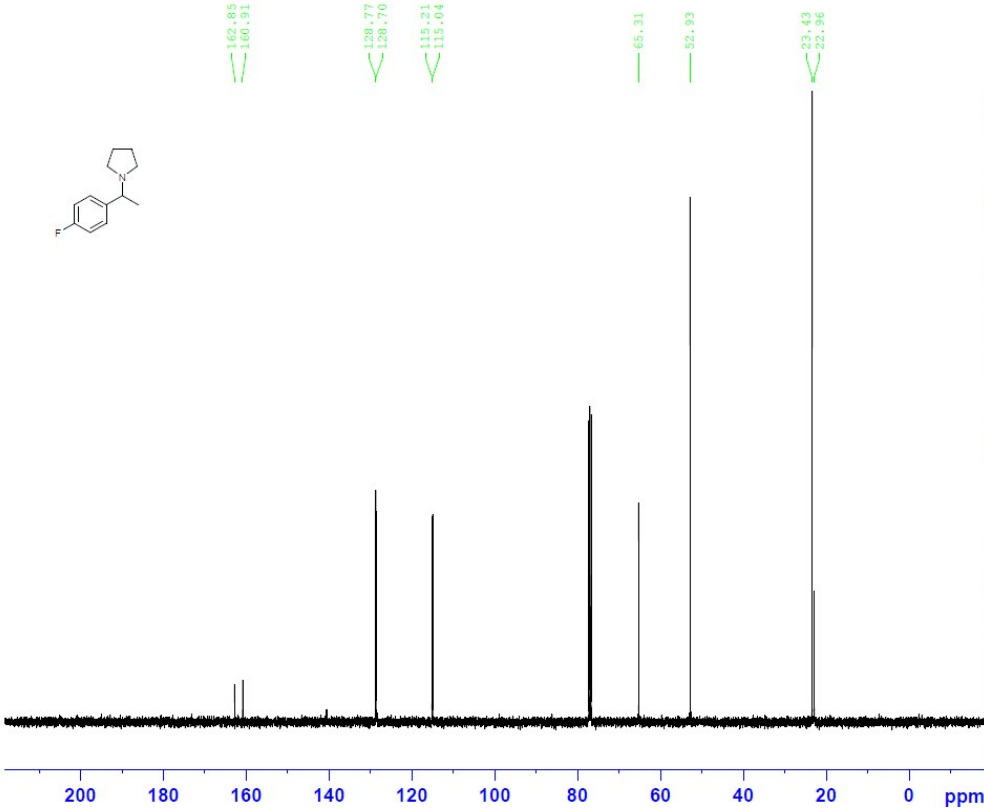

PROTON CDC13 3e

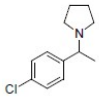

7.36  
7.34  
7.32  
7.30

3.30  
3.28  
3.27  
3.26

2.64  
2.46

1.83  
1.46  
1.44

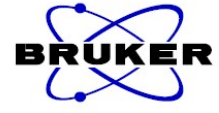

```

NAME      CMX-20190227-14
EXPNO     1
PROCNO    1
Date_     20190228
Time      9.02
INSTRUM   spect
PROBHD    5 mm PABBO BB-
PULPROG   zg30
TD         65536
SOLVENT   CDC13
NS         8
DS         2
SWH       10330.578 Hz
FIDRES    0.157632 Hz
AQ         3.171923 sec
RG         45.2
DW         48.400 usec
DE         6.50 usec
TE         296.9 K
D1         1.00000000 sec
TD0        1
  
```

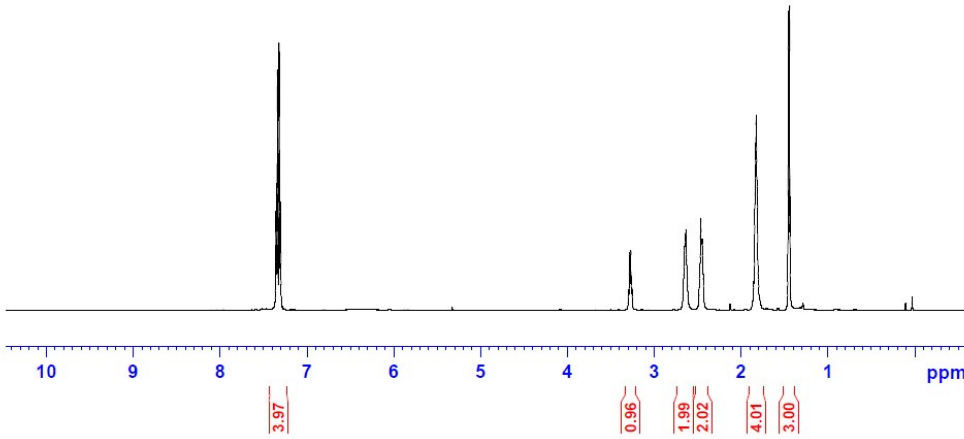

```

===== CHANNEL f1 =====
NUC1      1H
P1         12.60 usec
PL1        0.00 dB
PL1W       18.83080864 W
SFO1      500.1330885 MHz
SI         32768
SF         500.1300000 MHz
WDW        EM
SSB        0
LB         0.30 Hz
GB         0
PC         1.00
  
```

C13CPD CDC13 3e

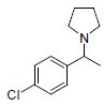

143.34  
132.67  
128.67  
128.56

65.43

52.95

23.43  
22.09

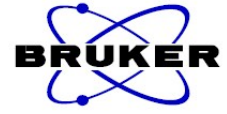

```

NAME      CMX-20190227-14
EXPNO     11
PROCNO    1
Date_     20190228
Time      9.04
INSTRUM   spect
PROBHD    5 mm PABBO BB-
PULPROG   zgpg30
TD         65536
SOLVENT   CDC13
NS         4
DS         4
SWH       29761.904 Hz
FIDRES    0.454131 Hz
AQ         1.1010548 sec
RG         203
DW         16.800 usec
DE         6.50 usec
TE         297.3 K
D1         2.00000000 sec
D11        0.03000000 sec
TD0        1
  
```

```

===== CHANNEL f1 =====
NUC1      13C
P1         9.50 usec
PL1        -1.00 dB
PL1W       112.80287170 W
SFO1      125.7703643 MHz
  
```

```

===== CHANNEL f2 =====
CPDPRG2   waltz16
NUC2      1H
PCPD2     80.00 usec
PL2        0.00 dB
PL12       16.05 dB
PL13       17.00 dB
PL2W       18.83080864 W
PL12W     0.46759412 W
PL13W     0.37572402 W
SFO2      500.1320005 MHz
SI         32768
SF         125.7577890 MHz
WDW        EM
SSB        0
LB         1.00 Hz
GB         0
PC         1.40
  
```

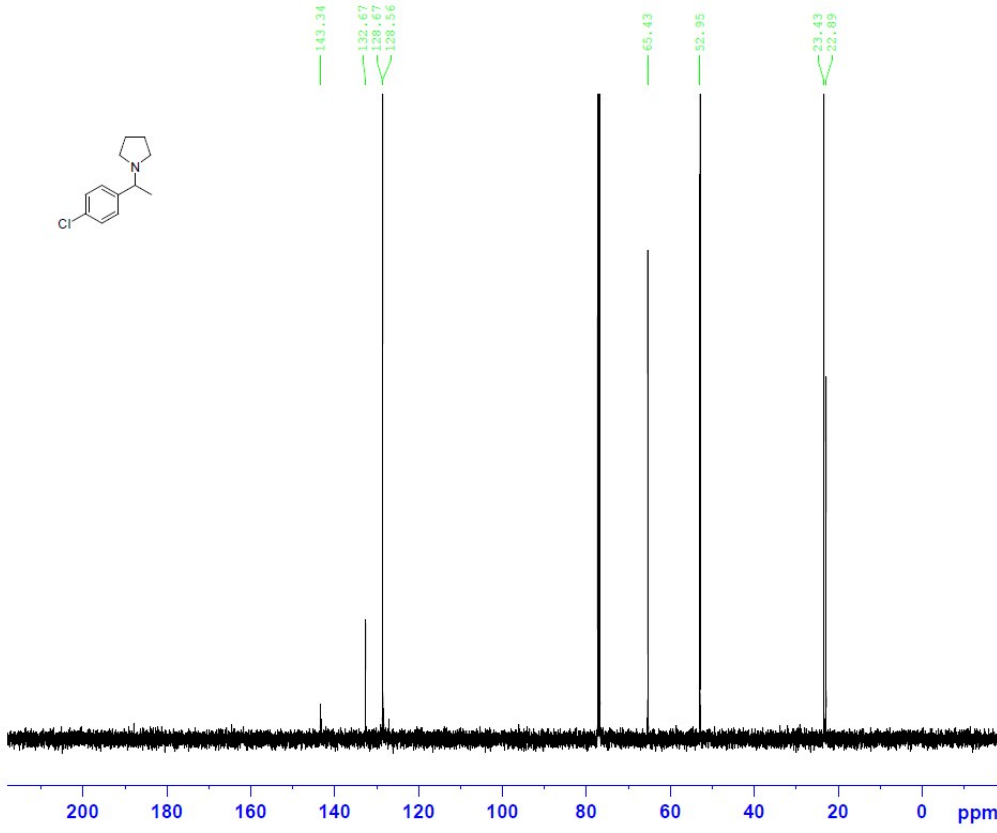

PROTON CDC13 3f

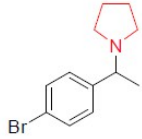

7.47  
7.47  
7.28  
7.26

3.23  
3.22  
3.20  
3.19  
2.60  
2.58  
2.42  
2.41  
2.40  
1.80  
1.42  
1.41

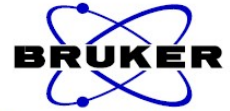

```

NAME      CMX-20190227-4
EXPNO    10
PROCNO   1
Date_    20190227
Time     17.09
INSTRUM  spect
PROBHD   5 mm PABBO BB-
PULPROG  zg30
TD       65536
SOLVENT  CDCl3
NS       8
DS       2
SWH      10330.578 Hz
FIDRES   0.157632 Hz
AQ       3.1719923 sec
RG       40.3
DW       48.400 usec
DE       6.50 usec
TE       297.5 K
D1       1.00000000 sec
TD0      1
    
```

```

===== CHANNEL f1 =====
NUC1     1H
P1       12.60 usec
PL1      0.00 dB
PL1W     18.83080864 W
SFO1     500.1330885 MHz
SI       32768
SF       500.1300000 MHz
WDW      EM
SSB      0
LB       0.30 Hz
GB       0
PC       1.00
    
```

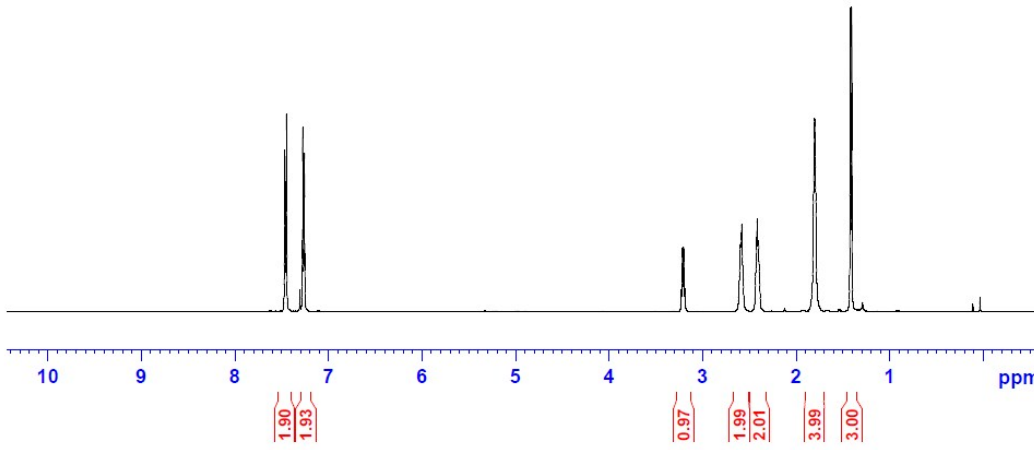

C13CPD CDC13 3f

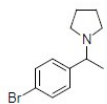

144.50  
131.44  
128.98  
120.54

65.42  
52.95

23.44  
23.10

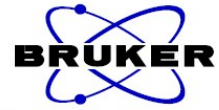

```

NAME      CMX-20190227-4
EXPNO    11
PROCNO   1
Date_    20190227
Time     17.11
INSTRUM  spect
PROBHD   5 mm PABBO BB-
PULPROG  zgpg30
TD       65536
SOLVENT  CDCl3
NS       64
DS       4
SWH      29761.904 Hz
FIDRES   0.454131 Hz
AQ       1.1010548 sec
RG       203
DW       16.800 usec
DE       6.50 usec
TE       298.1 K
D1       2.00000000 sec
D11      0.03000000 sec
TD0      1
    
```

```

===== CHANNEL f1 =====
NUC1     13C
P1       9.50 usec
PL1      -1.00 dB
PL1W     112.80287170 W
SFO1     125.7703643 MHz
    
```

```

===== CHANNEL f2 =====
CPDPRG2  waltz16
NUC2     1H
PCPD2    80.00 usec
PL2      0.00 dB
PL12     16.05 dB
PL13     17.00 dB
PL1W     18.83080864 W
PL12W    0.46759412 W
PL13W    0.37572402 W
SFO2     500.1320005 MHz
SI       32768
SF       125.7577890 MHz
WDW      EM
SSB      0
LB       1.00 Hz
GB       0
PC       1.40
    
```

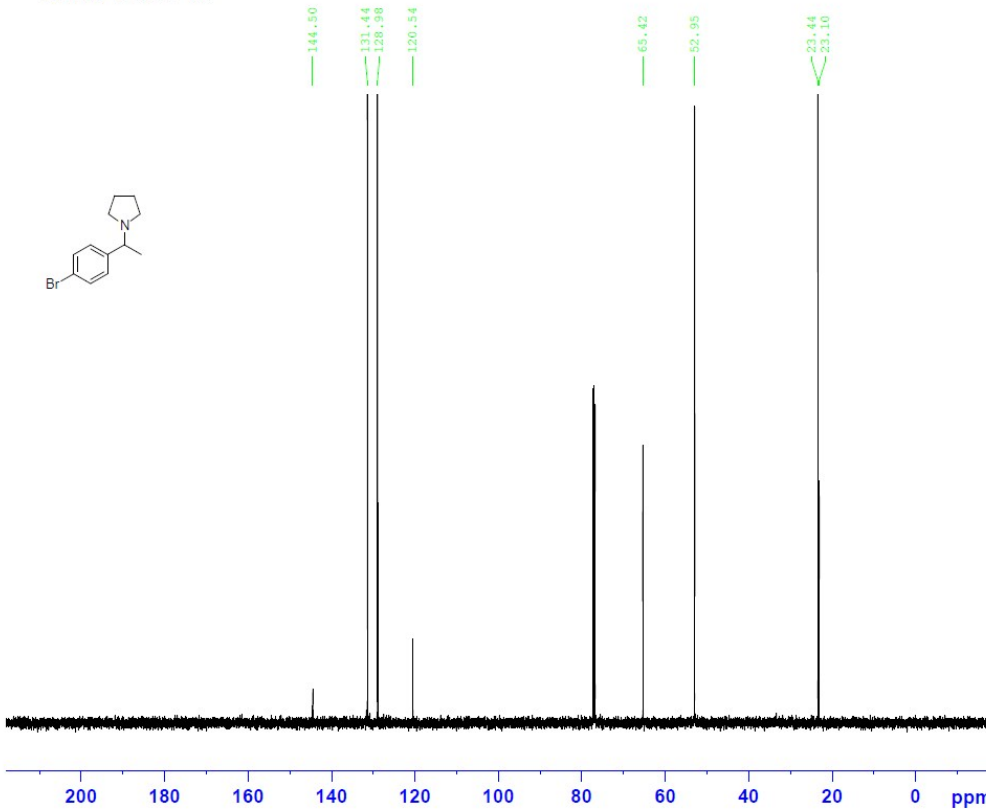

PROTON CDC13 3g

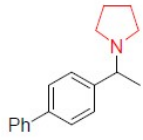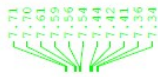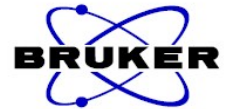

```

NAME      CMX-20190227-5
EXPNO    1
PROCNO   1
Date_    20190227
Time     17.26
INSTRUM  spect
PROBHD   5 mm PABBO BB-
PULPROG  zg30
TD       65536
SOLVENT  CDCl3
NS       8
DS       2
SWH      10330.576 Hz
FIDRES   0.157632 Hz
AQ       3.1719923 sec
RG       32
DW       48.400 usec
DE       6.50 usec
TE       297.0 K
D1       1.00000000 sec
TD0      1

```

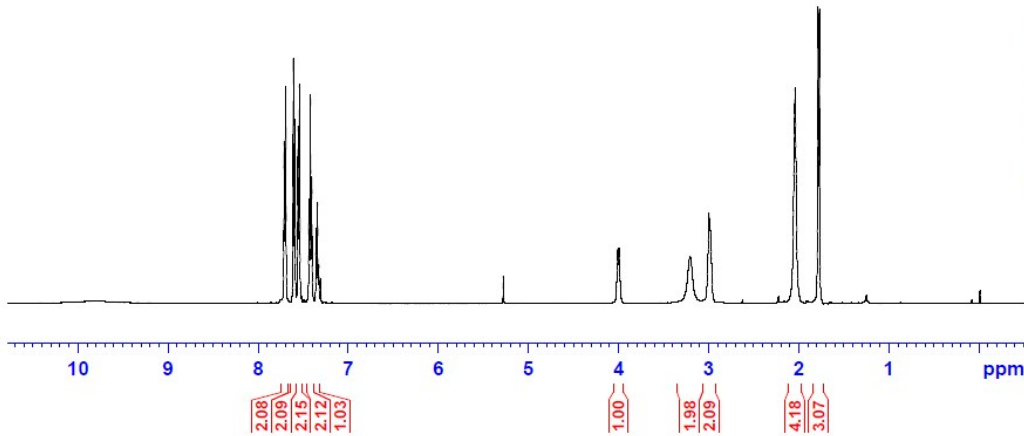

```

===== CHANNEL f1 =====
NUC1    1H
P1      12.60 usec
PL1     0.00 dB
PL1W    18.83080864 W
SFO1    500.1330885 MHz
SI      32768
SF      500.1300000 MHz
WDW     EM
SSB     0
LB      0.30 Hz
GB      0
PC      1.00

```

C13CPD CDC13 3g

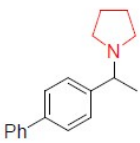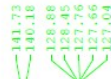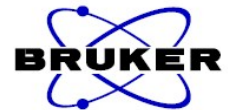

```

NAME      CMX-20190227-5
EXPNO    11
PROCNO   1
Date_    20190227
Time     17.28
INSTRUM  spect
PROBHD   5 mm PABBO BB-
PULPROG  zgpg30
TD       65536
SOLVENT  CDCl3
NS       17
DS       4
SWH      29761.904 Hz
FIDRES   0.454131 Hz
AQ       1.1010548 sec
RG       203
DW       16.800 usec
DE       6.50 usec
TE       297.3 K
D1       2.00000000 sec
D11      0.03000000 sec
TD0      1

```

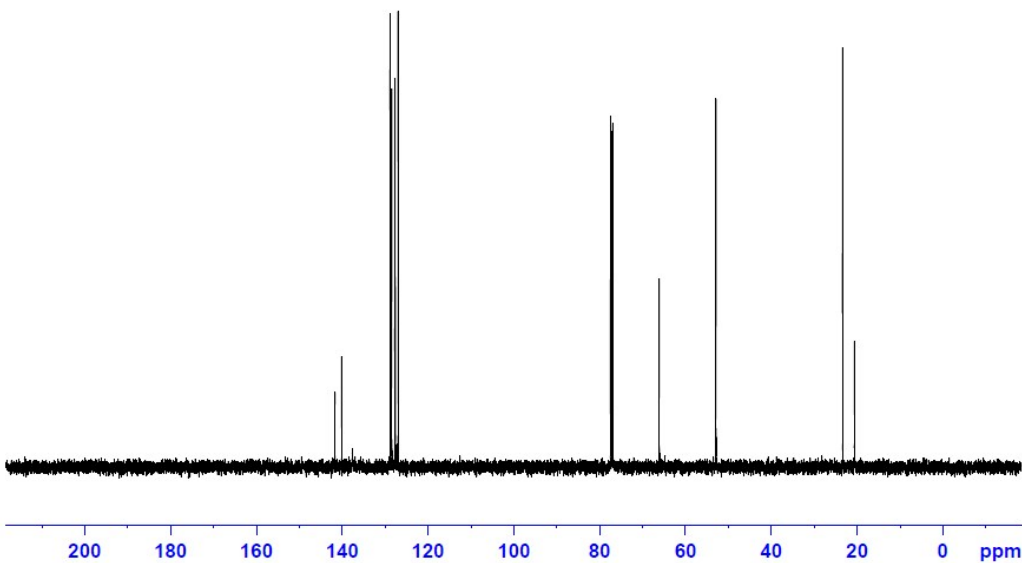

```

===== CHANNEL f1 =====
NUC1    13C
P1      9.50 usec
PL1     -1.00 dB
PL1W    112.80287170 W
SFO1    125.7703643 MHz

===== CHANNEL f2 =====
CPDPRG2  waltz16
NUC2     1H
PCPD2    80.00 usec
PL2      0.00 dB
PL12     16.05 dB
PL13     17.00 dB
PL2W     18.83080864 W
PL12W    0.46759412 W
PL13W    0.37572402 W
SFO2    500.1300005 MHz
SI      32768
SF      125.7577890 MHz
WDW     EM
SSB     0
LB      1.00 Hz
GB      0
PC      1.40

```

Spectrum from CMXWZT2018717-1.wiff (sam...MS (100 - 3000) from 0.054 to 0.101 min

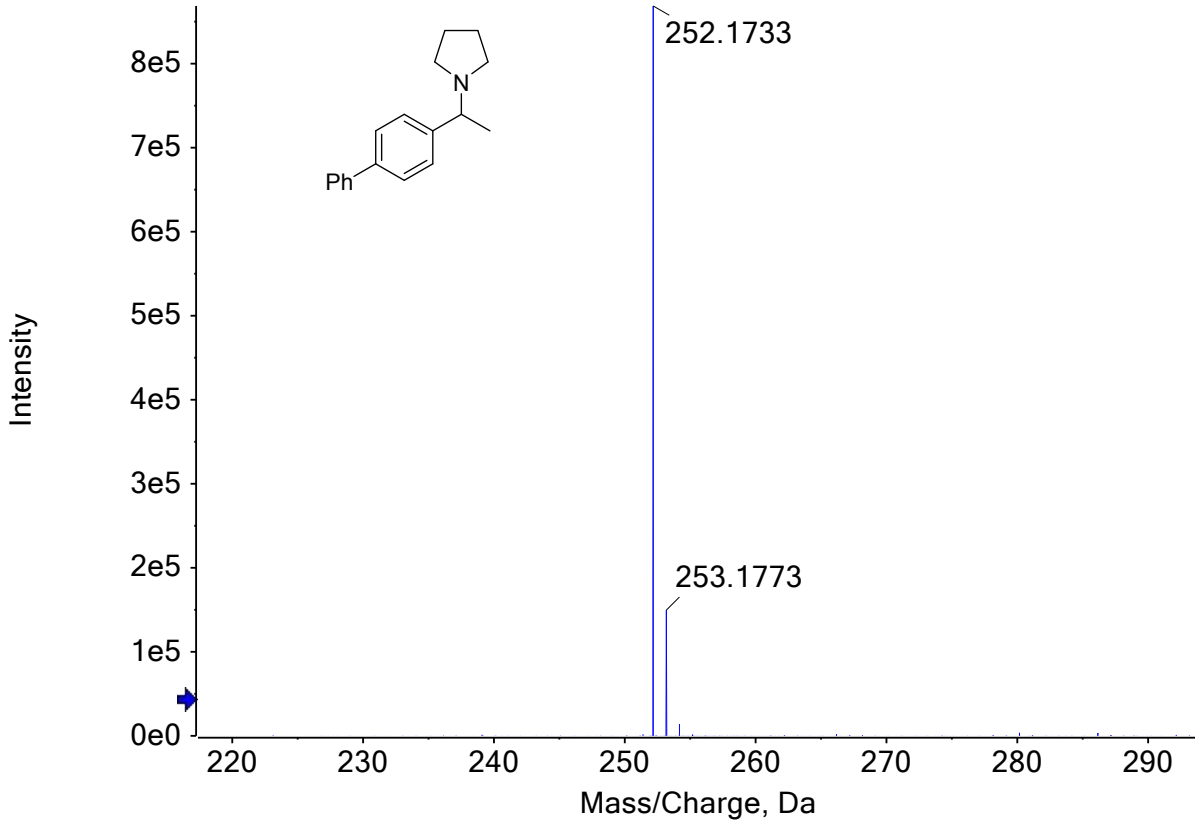

PROTON CDC13 3h

8.20  
8.18  
7.56  
7.54

3.34  
3.33  
2.58  
2.58  
2.57  
2.41  
2.40  
2.39  
1.80  
1.79  
1.75  
1.42  
1.41

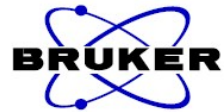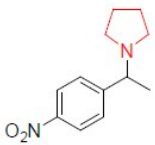

```

NAME      CMX-20190227-8
EXPNO     10
PROCNO    1
Date_     20190228
Time      8.20
INSTRUM   spect
PROBHD    5 mm PABBO BB-
PULPROG   zg30
ID        65536
SOLVENT   CDC13
NS        8
DS        2
SWH       10330.578 Hz
FIDRES    0.157632 Hz
AQ        3.171923 sec
RG        40.3
DW        48.400 usec
DE        6.50 usec
TE        299.0 K
D1        1.00000000 sec
TD0       1
    
```

```

===== CHANNEL f1 =====
NUCL      1H
P1        12.60 usec
PL1       0.00 dB
PL1W      18.8300064 W
SF01      500.1330835 MHz
SI        32768
SF        500.1300000 MHz
WDW       EM
SSB       0
LB        0.30 Hz
GB        0
PC        1.00
    
```

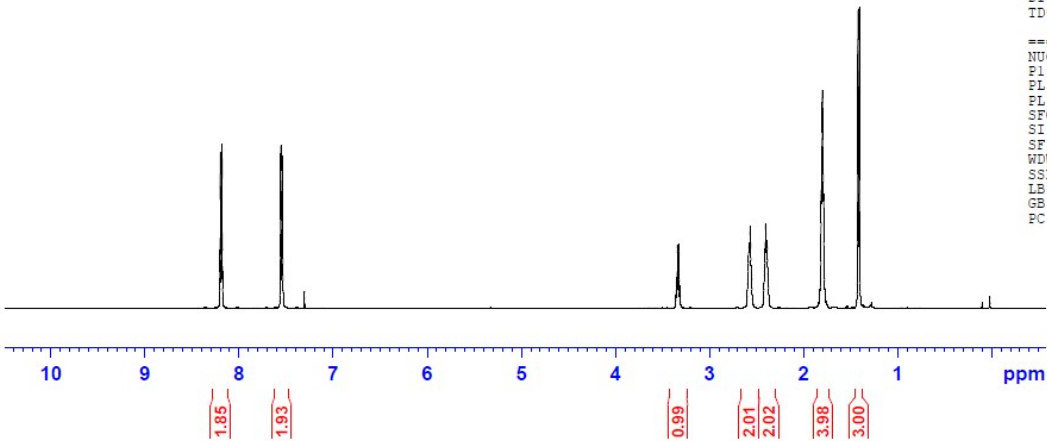

C13CPD CDCl3 3h

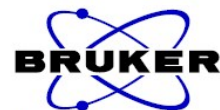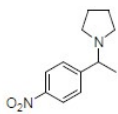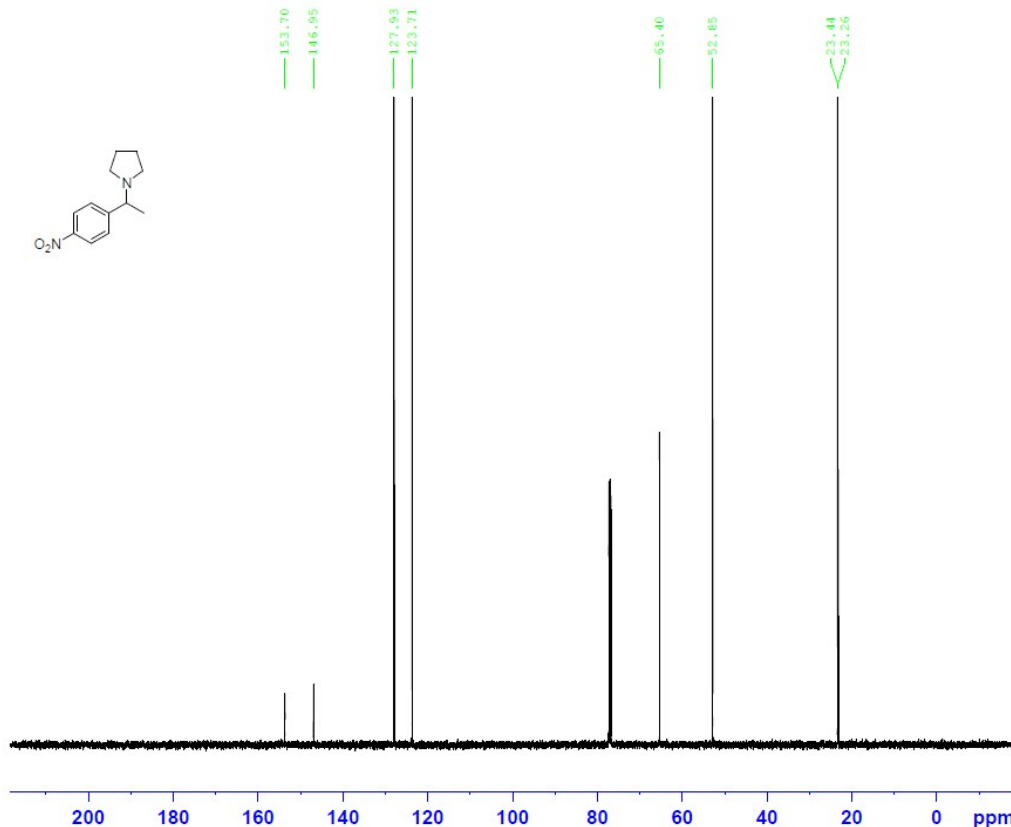

```

NAME          CMX-20190227-8
EXPNO         11
PROCNO        1
Date_         20190228
Time          8.24
INSTRUM       spect
PROBHD        5 mm PABBO BB-
PULPROG       zgpg30
TD            65536
SOLVENT       CDCl3
NS            64
DS            4
SWH           29761.904 Hz
FIDRES        0.454131 Hz
AQ            1.1010543 sec
RG            203
DW            16.800 usec
DE            6.50 usec
TE            299.3 K
D1            2.00000000 sec
D11           0.03000000 sec
TD0           1

===== CHANNEL f1 =====
NUC1          13C
P1            9.50 usec
PL1           -1.00 dB
PL1W          112.60287170 W
SFO1          125.7703643 MHz

===== CHANNEL f2 =====
CPDPRG2       waltz16
NUC2          1H
PCPD2         80.00 usec
PL2           0.00 dB
PL12          16.05 dB
PL13          17.00 dB
PL2W          19.93080864 W
PL12W         0.46759412 W
PL13W         0.37572402 W
SFO2          500.1320005 MHz
SI            32768
SF            125.7577890 MHz
WDW           EM
SSB           0
LB            1.00 Hz
GB            0
PC            1.40
    
```

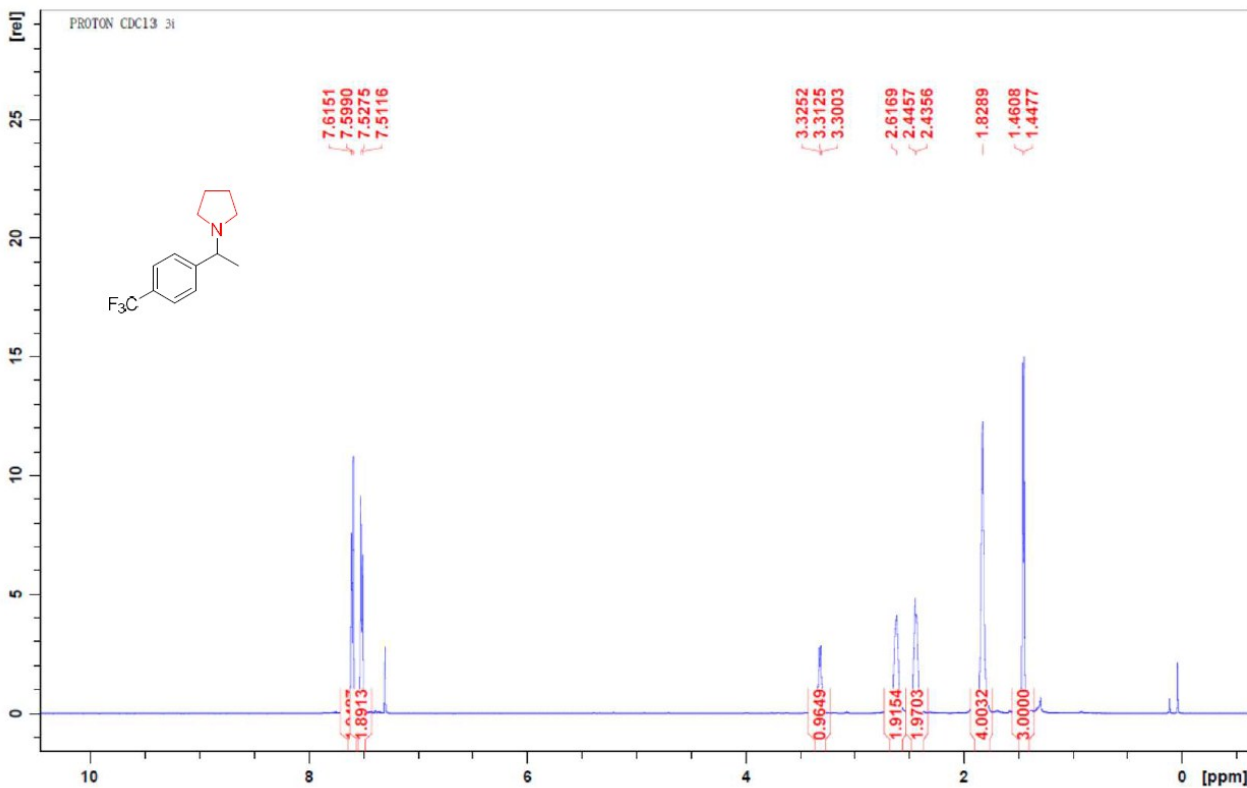

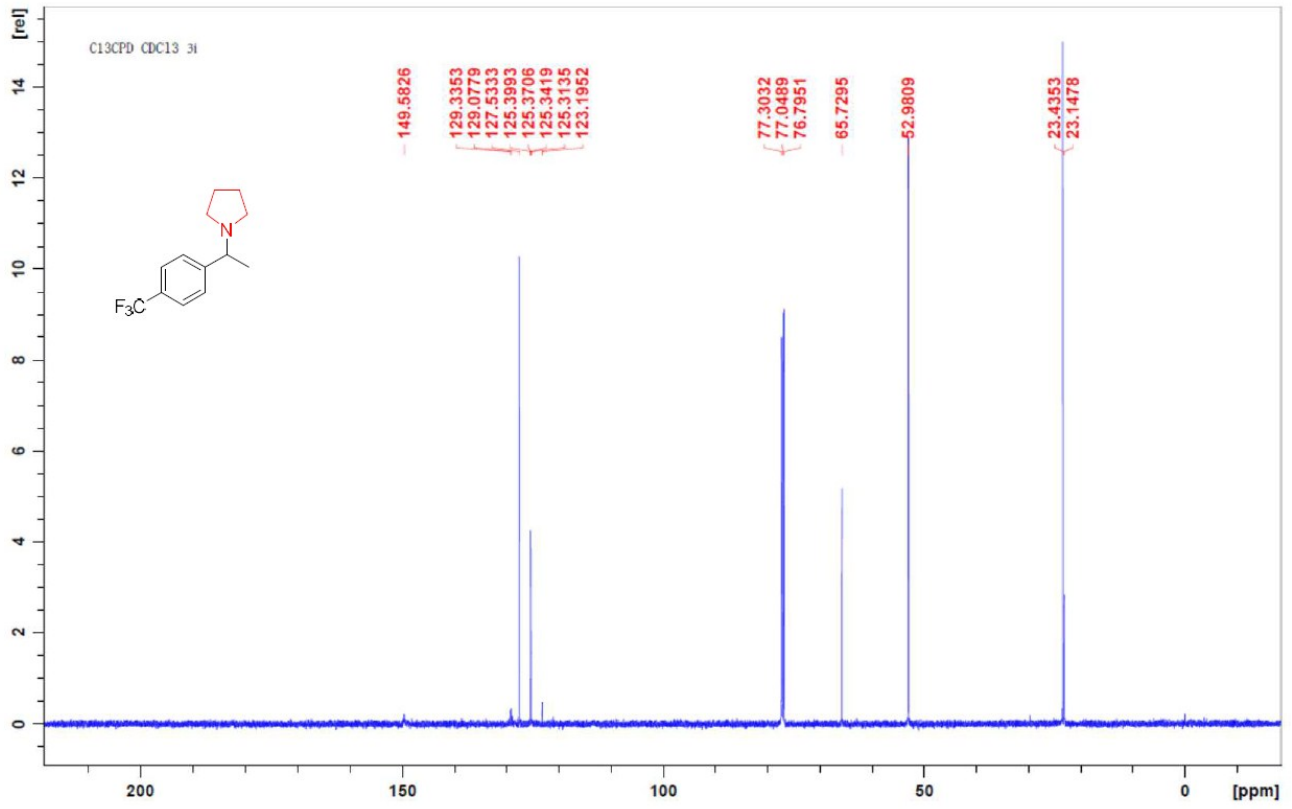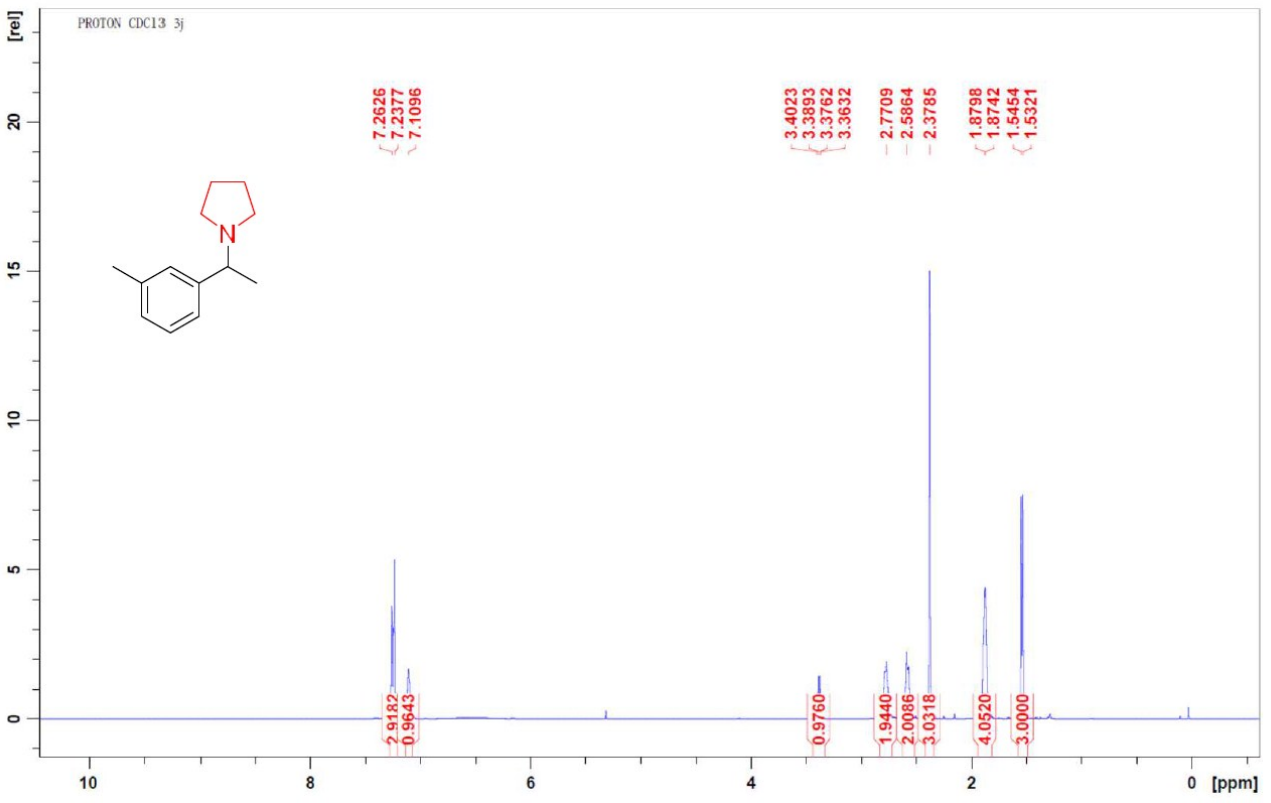



C13CPD CDC13 3j

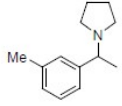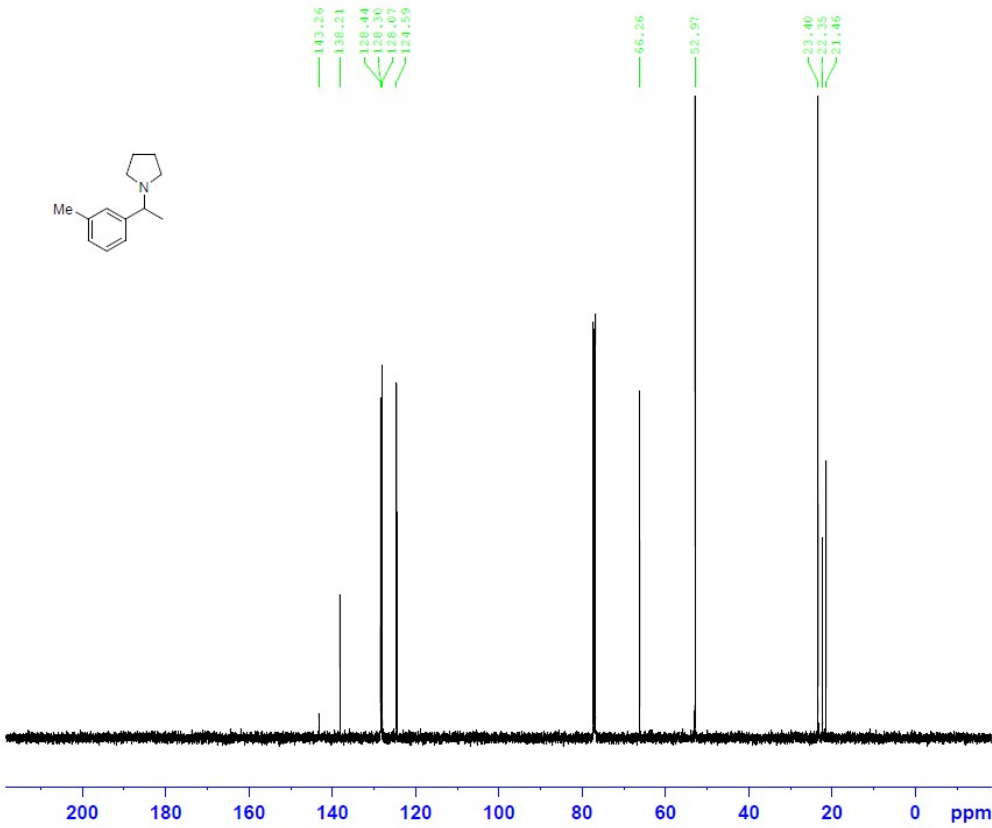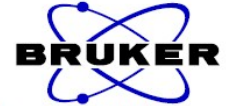

```

NAME      CMX-20190227-6
EXPNO     11
PROCNO    1
Date_     20190227
Time      17.36
INSTRUM   spect
PROBHD    5 mm PABBO BB-
PULPROG   zgpg30
ID        65536
SOLVENT   CDC13
NS        64
DS        4
SWH       29761.904 Hz
FIDRES    0.454131 Hz
AQ        1.1010548 sec
RG        203
DW        16.800 usec
DE        6.50 usec
TE        297.9 K
D1        2.00000000 sec
D11       0.03000000 sec
TD0       1
  
```

```

===== CHANNEL f1 =====
NUC1      13C
P1        9.50 usec
PL1       -1.00 dB
PL1W     112.80287170 W
SF01     125.7703643 MHz
  
```

```

===== CHANNEL f2 =====
CPDPRG2   waltz16
NUC2      1H
PCPD2     80.00 usec
PL2       0.00 dB
PL12     18.00 dB
PL13     17.00 dB
PL2W     18.83080864 W
PL12W    0.46759412 W
PL13W    0.37572402 W
SF02     500.1320005 MHz
SI        32768
SF        125.7577890 MHz
WDW       EM
SSB       0
LB        1.00 Hz
GB        0
PC        1.40
  
```

PROTON CDC13 3k

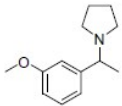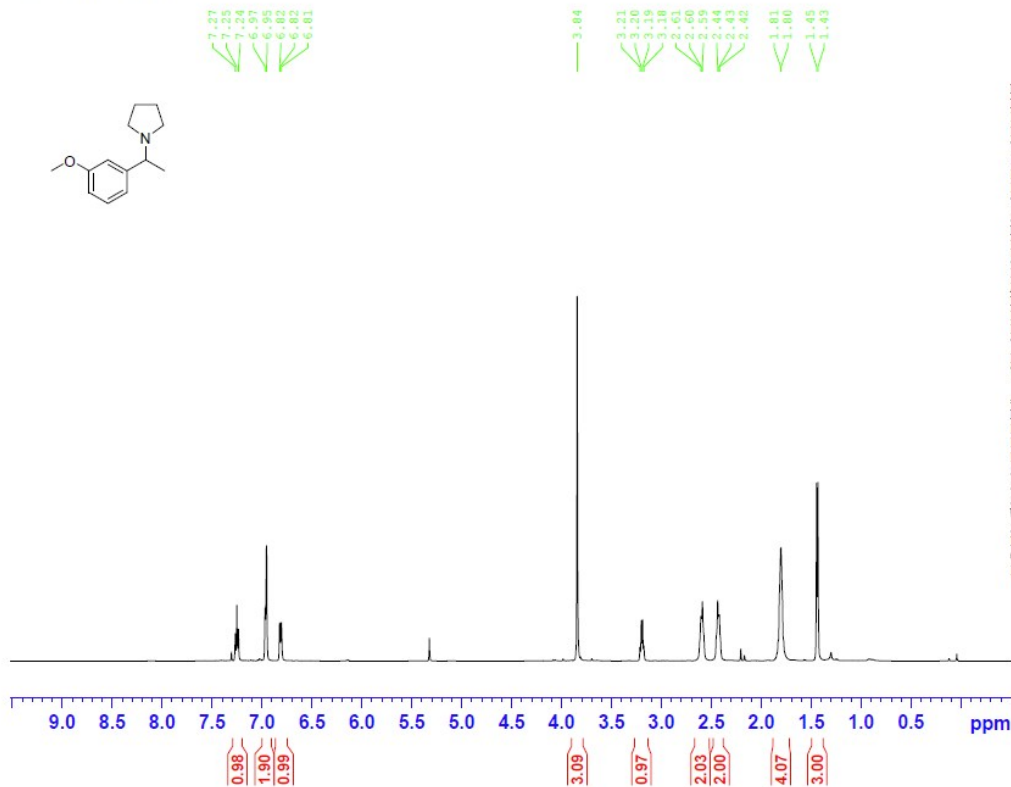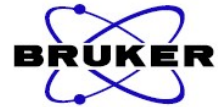

```

NAME      CMX-20180109-16
EXPNO     10
PROCNO    1
Date_     20180109
Time      11.36
INSTRUM   spect
PROBHD    5 mm PABBO BB-
PULPROG   zg30
ID        65536
SOLVENT   CDC13
NS        16
DS        2
SWH       10330.578 Hz
FIDRES    0.157632 Hz
AQ        3.1719923 sec
RG        32
DW        48.400 usec
DE        6.50 usec
TE        295.8 K
D1        1.00000000 sec
TD0       1
  
```

```

===== CHANNEL f1 =====
NUC1      1H
P1        12.60 usec
PL1       0.00 dB
PL1W     18.83080864 W
SF01     500.1330885 MHz
SI        32768
SF        500.1330000 MHz
WDW       EM
SSB       0
LB        0.30 Hz
GB        0
PC        1.00
  
```

C13CPD CDC13 3k

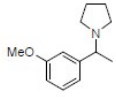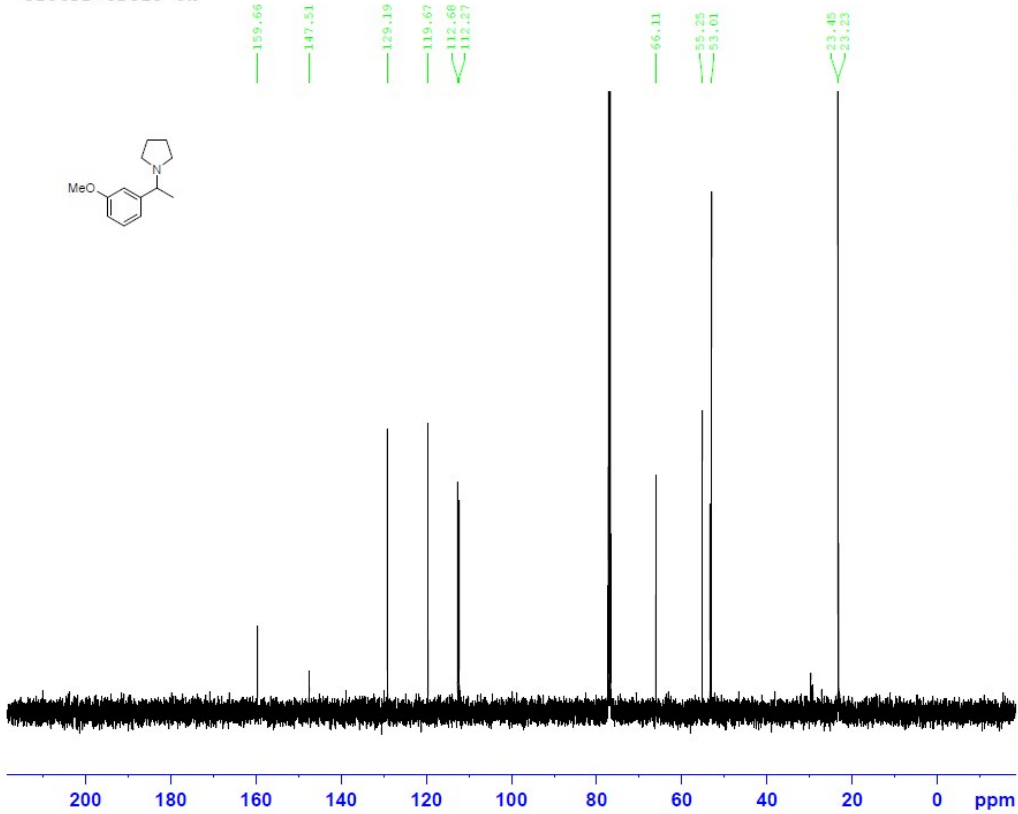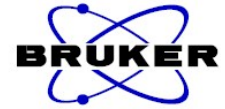

```

NAME      CMX-20190225-6
EXPNO    11
PROCNO   1
Date_    20190225
Time     12.10
INSTRUM  spect
PROBHD   5 mm PABBO BB-
PULPROG  zgpg30
TD        65536
SOLVENT  CDC13
NS        4
DS        4
SWH       29761.904 Hz
FIDRES    0.454131 Hz
AQ        1.1010548 sec
RG        203
DW        16.800 usec
DE        6.50 usec
TE        300.0 K
DL        2.00000000 sec
DL1       0.03000000 sec
TD0       1

===== CHANNEL f1 =====
NUC1      13C
P1        9.50 usec
PL1       -1.00 dB
PL1W      112.80287170 W
SF01      125.7703643 MHz

===== CHANNEL f2 =====
CPDPRG2  waltz16
NUC2      1H
PCPD2     80.00 usec
PL2       0.00 dB
PL12      16.05 dB
PL13      17.00 dB
PL1W      18.83080864 W
PL12W     0.46759412 W
PL13W     0.37572402 W
SF02      500.1320005 MHz
SI        32768
SF        125.7577890 MHz
WDW       EM
SSB       0
LB        1.00 Hz
GB        0
PC        1.40
    
```

PROTON CDC13 31

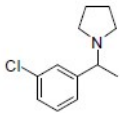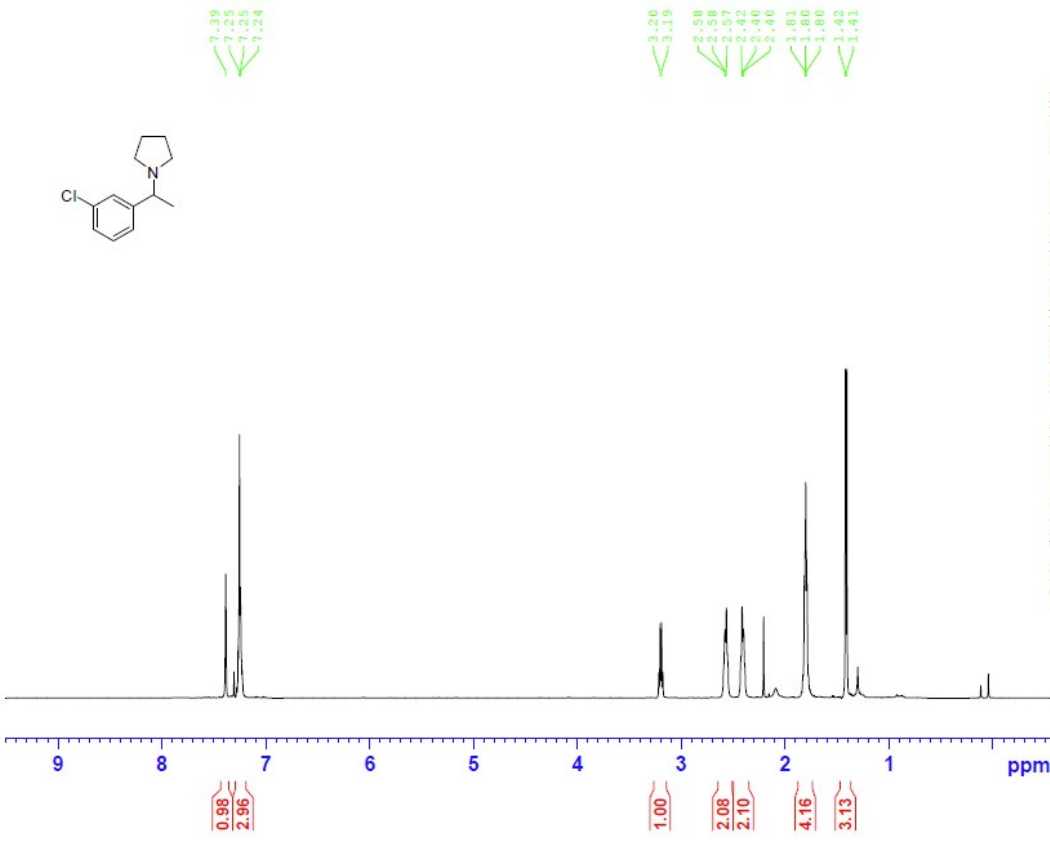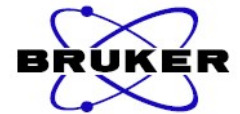

```

NAME      CMX-20170925-5
EXPNO    10
PROCNO   1
Date_    20170926
Time     9.11
INSTRUM  spect
PROBHD   5 mm PASEI 1H/
PULPROG  zg30
TD        65536
SOLVENT  CDC13
NS        16
DS        2
SWH       10330.578 Hz
FIDRES    0.157632 Hz
AQ        3.1719923 sec
RG        64
DW        48.400 usec
DE        6.50 usec
TE        302.0 K
DL        1.00000000 sec
TD0       1

===== CHANNEL f1 =====
NUC1      1H
P1        6.80 usec
PL1       0.00 dB
PL1W      18.83080864 W
SF01      500.1330885 MHz
SI        32768
SF        500.1330000 MHz
WDW       EM
SSB       0
LB        0.30 Hz
GB        0
PC        1.00
    
```

C13CPD CDC13 3l

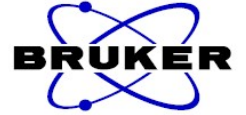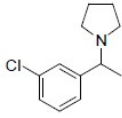

147.47  
134.18  
129.66  
127.38  
127.14  
125.44  
65.57  
52.88  
23.44  
22.97

```
NAME CMX-20180719-16
EXPNO 10
PROCNO 1
Date_ 20180719
Time 12.19
INSTRUM spect
PROBHD 5 mm PABBO BB-
PULPROG zgpg30
TD 65536
SOLVENT CDC13
NS 183
DS 4
SWH 29761.904 Hz
FIDRES 0.454131 Hz
AQ 1.1010548 sec
RG 203
DW 16.800 usec
DE 6.50 usec
TE 304.0 K
D1 0.60000002 sec
D11 0.03000000 sec
TD0 1

===== CHANNEL f1 =====
NUC1 13C
P1 9.50 usec
PL1 -1.00 dB
PL1W 112.80287170 W
SFO1 125.7703643 MHz

===== CHANNEL f2 =====
CPDPRG2 waltz16
NUC2 1H
PCPD2 80.00 usec
PL2 0.00 dB
PL12 16.05 dB
PL13 17.00 dB
PL2W 18.83080864 W
PL12W 0.46759412 W
PL13W 0.37572402 W
SFO2 500.1320005 MHz
SI 32768
SF 125.7577890 MHz
WDW EM
SSB 0
LB 1.00 Hz
GB 0
PC 1.40
```

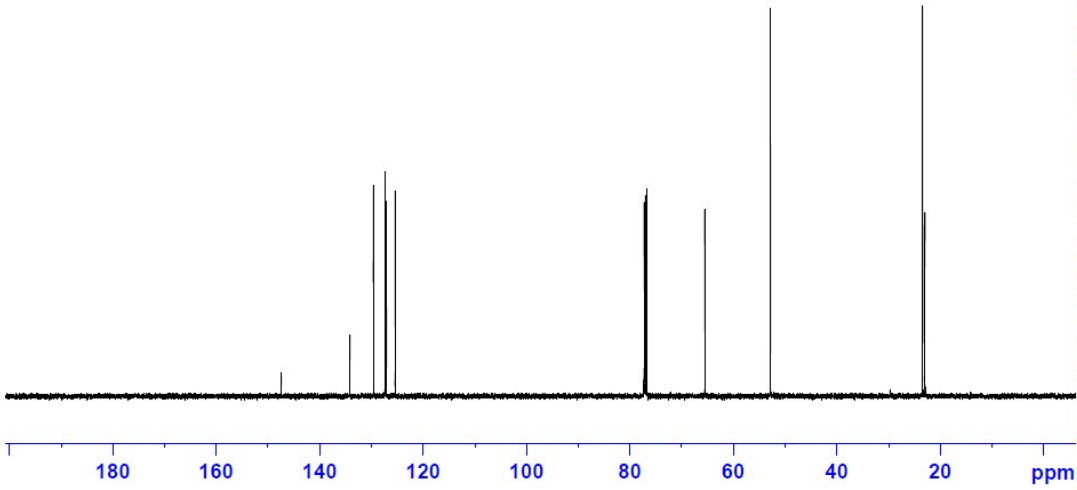

87 #14 RT: 0.19 AV: 1 NL: 9.38E8  
T: FTMS + p ESI Full ms [150.00-2000.00]

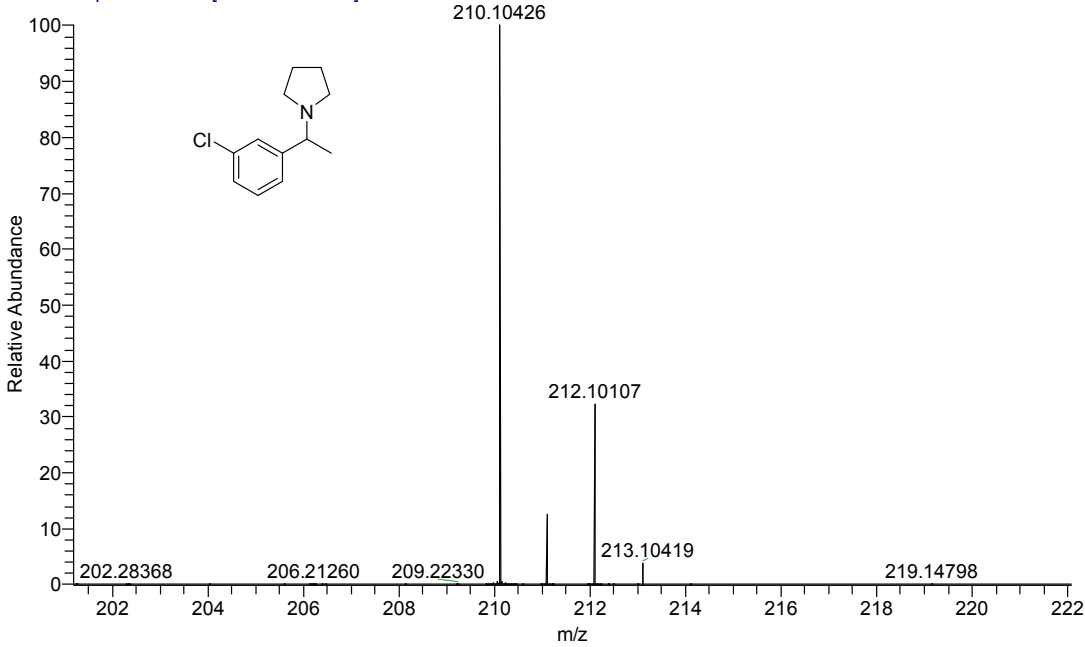

PROTON CDCl3 3m

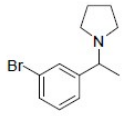

7.54  
7.46  
7.38  
7.31  
7.29  
7.22  
7.20  
7.19

3.20  
3.18  
3.17  
3.16  
2.57  
2.56  
2.41  
2.40  
2.39  
1.80  
1.42  
1.40

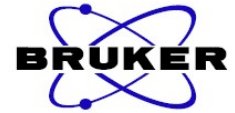

```

NAME      CMX-20180109-15
EXPNO     10
PROCNO    1
Date_     20180109
Time      11.13
INSTRUM   spect
PROBHD    5 mm PABBO BB-
PULPROG   zg30
TD        65536
SOLVENT   CDCl3
NS        16
DS        2
SWH       10330.575 Hz
FIDRES    0.157632 Hz
AQ        3.1719923 sec
RG        45.2
DW        48.400 usec
DE        6.50 usec
TE        295.3 K
D1        1.00000000 sec
TD0       1
  
```

```

===== CHANNEL f1 =====
NUC1      1H
P1        12.60 usec
PL1       0.00 dB
PL1W      18.83080864 W
SFO1      500.1330835 MHz
SI        32768
SF        500.1300000 MHz
WDW       EM
SSB       0
LB        0.30 Hz
GB        0
PC        1.00
  
```

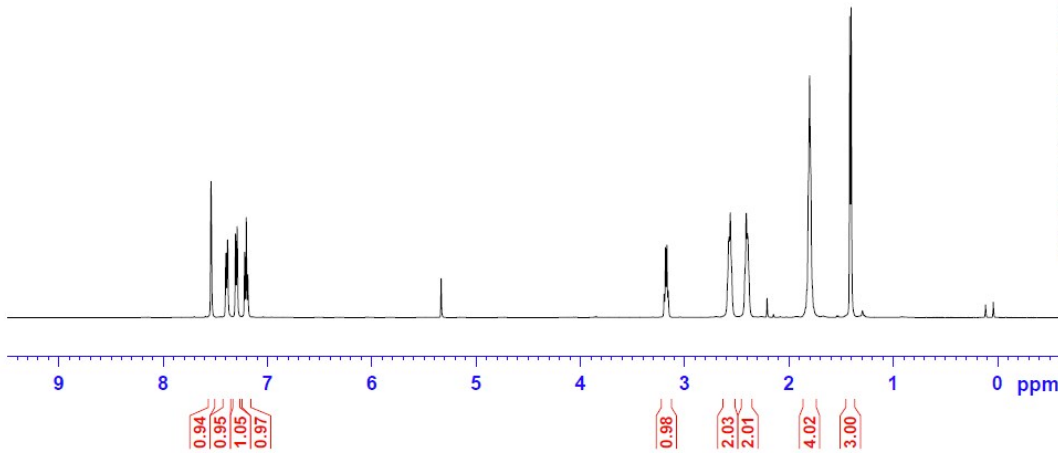

C13CPD CDCl3 3m

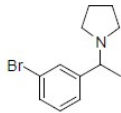

148.35  
130.23  
129.92  
129.80  
127.83  
122.43

65.51  
52.89  
23.45  
23.22

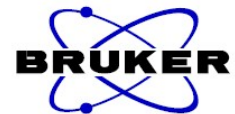

```

NAME      CMX-20180719-14
EXPNO     10
PROCNO    1
Date_     20180719
Time      12.04
INSTRUM   spect
PROBHD    5 mm PABBO BB-
PULPROG   zgpg30
TD        65536
SOLVENT   CDCl3
NS        256
DS        4
SWH       29761.904 Hz
FIDRES    0.454131 Hz
AQ        1.1010548 sec
RG        203
DW        16.800 usec
DE        6.50 usec
TE        304.0 K
D1        2.00000000 sec
D11       0.03000000 sec
TD0       1
  
```

```

===== CHANNEL f1 =====
NUC1      13C
P1        9.50 usec
PL1       -1.00 dB
PL1W      112.80287170 W
SFO1      125.7703643 MHz
  
```

```

===== CHANNEL f2 =====
CFDPRG2   waltz16
NUC2      1H
PCPD2     80.00 usec
PL2       0.00 dB
PL12      16.05 dB
PL13      17.00 dB
PL2W      18.83080864 W
PL12W     0.46759412 W
PL13W     0.37572402 W
SFO2      500.1320005 MHz
SI        32768
SF        125.7577890 MHz
WDW       EM
SSB       0
LB        1.00 Hz
GB        0
PC        1.40
  
```

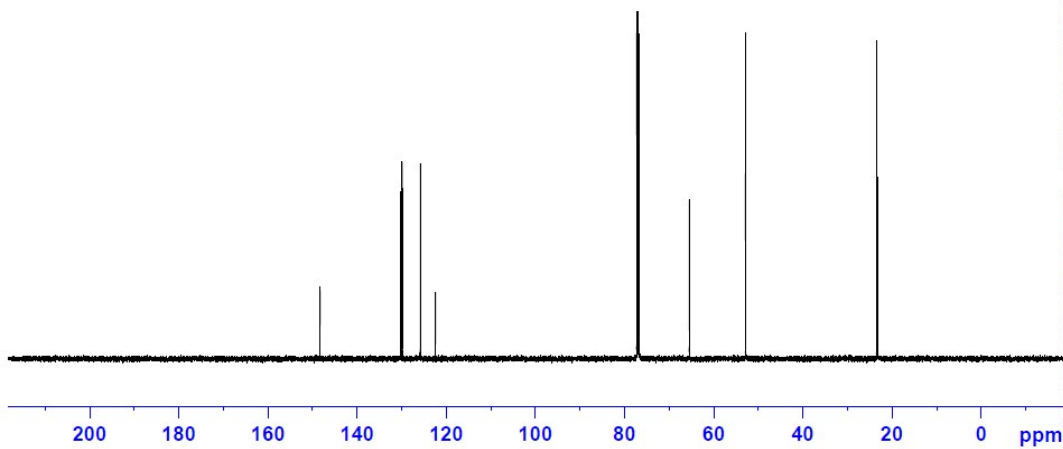

Spectrum from CMXWZT2018717-2.wiff (s... (100 - 3000) from 0.054 to 0.116 min

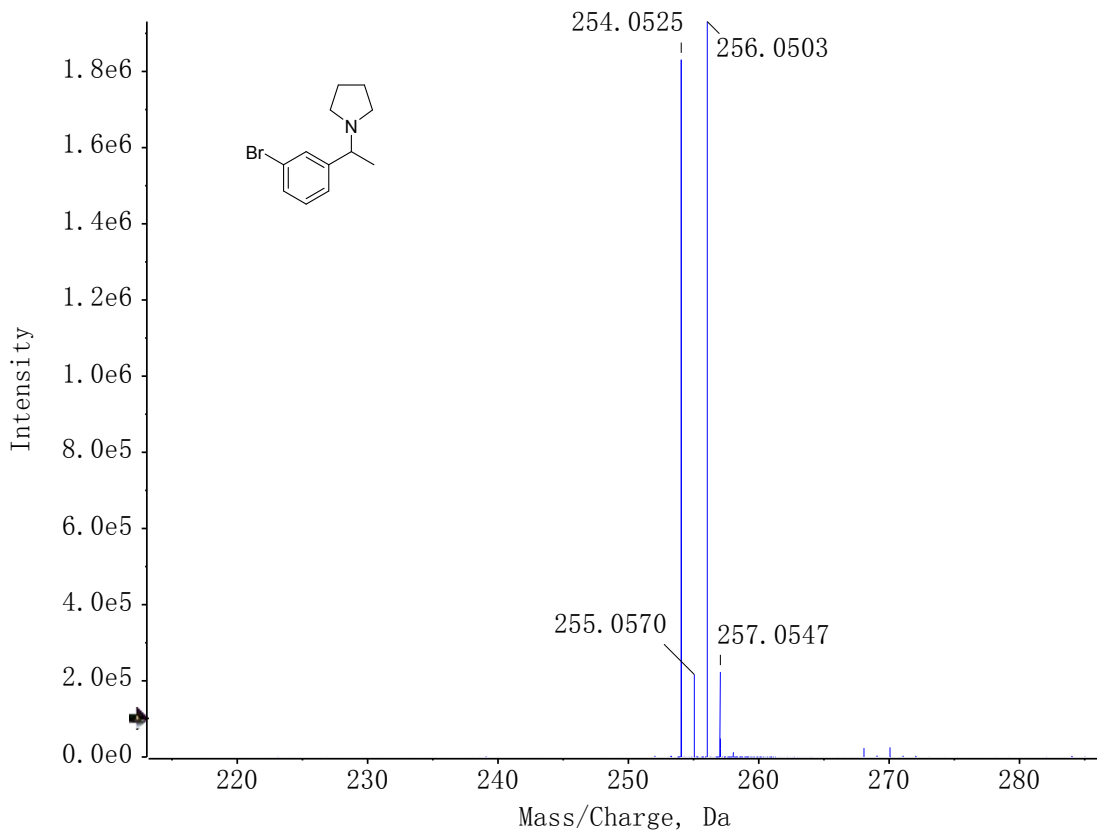

PROTON CDC13 3o

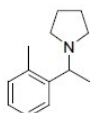

7.58  
7.57  
7.24  
7.24  
7.23  
7.16

3.54  
3.52  
3.51  
3.50

2.58  
2.58  
2.49  
2.49  
2.41

1.82  
1.81  
1.40  
1.38

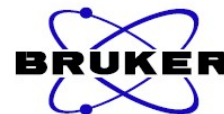

```

NAME      CMX-20170919-7
EXPNO     10
PROCNO    1
Date_     20170919
Time      11.37
INSTRUM   spect
PROBHD    5 mm PABBO BB-
PULPROG   zg30
TD        65536
SOLVENT   CDC13
NS        16
DS        2
SWH       10330.578 Hz
FIDRES    0.157632 Hz
AQ        3.1719923 sec
RG        45.2
DW        48.400 usec
DE        6.50 usec
TE        303.4 K
D1        1.00000000 sec
TD0       1
    
```

```

===== CHANNEL f1 =====
NUC1      1H
P1        12.60 usec
PL1       0.00 dB
PL1W      16.83000864 W
SFO1     500.1330835 MHz
SI        32768
SF        500.1300000 MHz
WDW       EM
SSB       0
LB        0.30 Hz
GB        0
PC        1.00
    
```

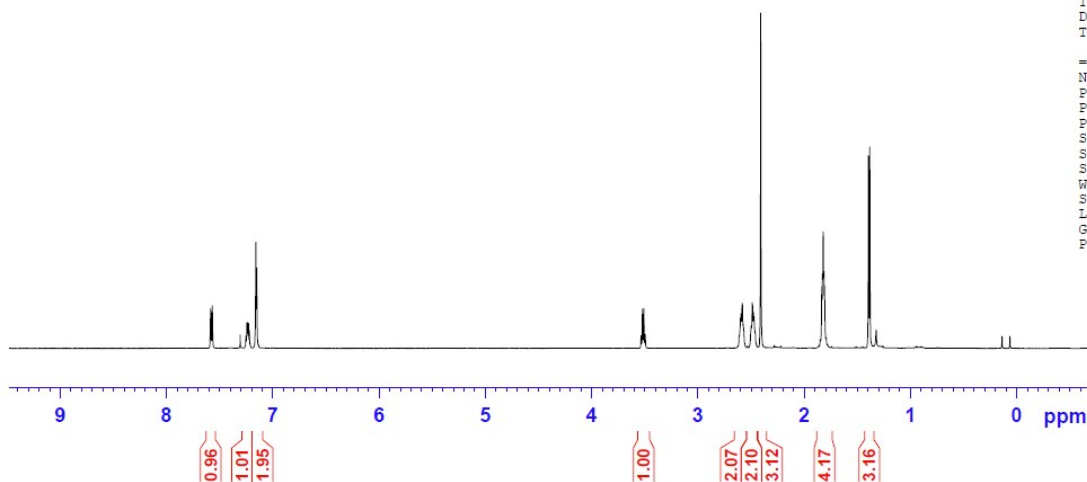

C13CPD CDC13 3o

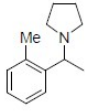

144.11  
134.51  
130.20  
126.99  
126.10

61.25

53.04

23.53

22.44

19.57

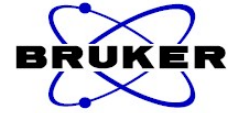

```

NAME      CMX-20190225-9
EXPNO     11
PROCNO    1
Date_     20190225
Time      12.35
INSTRUM   spect
PROBHD    5 mm PABBO BB-
PULPROG   zgpg30
TD        65536
SOLVENT   CDC13
NS        64
DS        4
SWH       29761.904 Hz
FIDRES    0.454131 Hz
AQ        1.1010548 sec
RG        203
DW        16.800 usec
DE        6.50 usec
TE        300.0 K
D1        2.00000000 sec
D11       0.03000000 sec
TD0       1
  
```

```

===== CHANNEL f1 =====
NUC1      13C
P1        9.50 usec
PL1       -1.00 dB
PL1W     112.80287170 W
SFO1     125.7703643 MHz
  
```

```

===== CHANNEL f2 =====
CPDPRG2   waltz16
NUC2      1H
PCPD2     80.00 usec
PL2       0.00 dB
PL12     16.05 dB
PL13     17.00 dB
PL2W     18.83080864 W
PL12W    0.46759412 W
PL13W    0.37579402 W
SFO2     500.1320005 MHz
SI        32768
SF        125.7577890 MHz
WDW       EM
SSB       0
LB        1.00 Hz
GB        0
PC        1.40
  
```

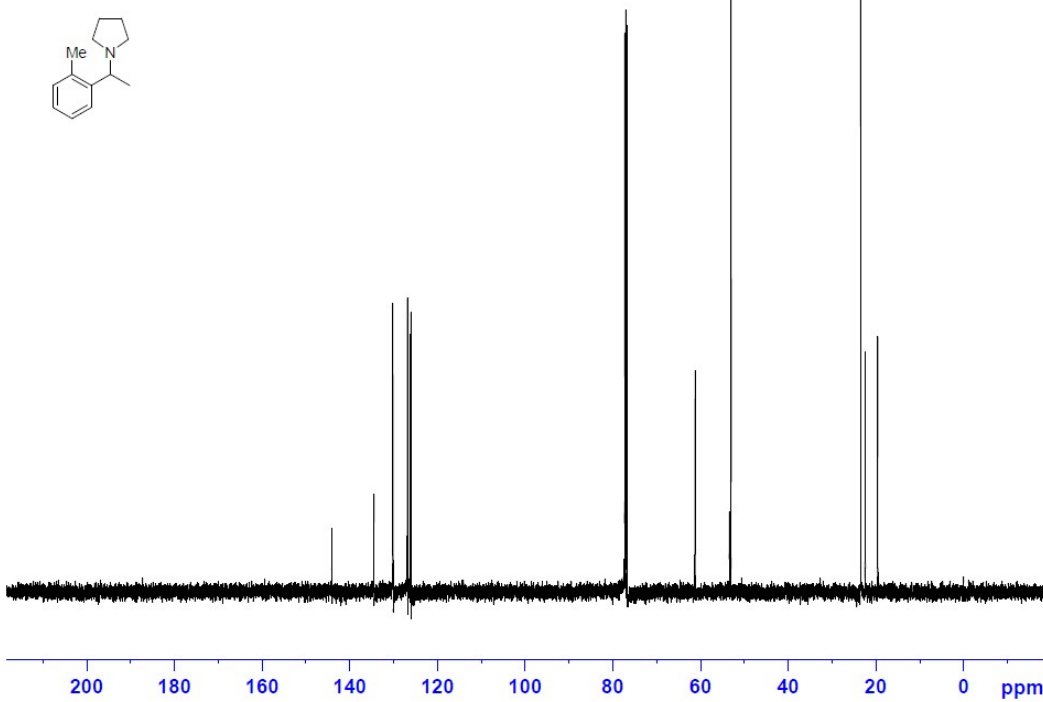

PROTON CDC13 3p

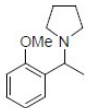

7.57  
7.56  
7.55  
7.23  
7.03  
7.00  
6.91  
6.89

3.86

2.60

2.51

2.51

1.81

1.40

1.38

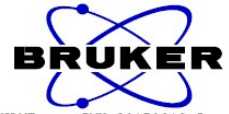

```

NAME      CMX-20170919-5
EXPNO     10
PROCNO    1
Date_     20170919
Time      11.27
INSTRUM   spect
PROBHD    5 mm PABBO BB-
PULPROG   zg30
TD        65536
SOLVENT   CDC13
NS        16
DS        2
SWH       10330.578 Hz
FIDRES    0.157632 Hz
AQ        3.1719923 sec
RG        32
DW        48.400 usec
DE        6.50 usec
TE        303.4 K
D1        1.00000000 sec
TD0       1
  
```

```

===== CHANNEL f1 =====
NUC1      1H
P1        12.60 usec
PL1       0.00 dB
PL1W     18.83080864 W
SFO1     500.1330885 MHz
SI        32768
SF        500.1300000 MHz
WDW       EM
SSB       0
LB        0.30 Hz
GB        0
PC        1.00
  
```

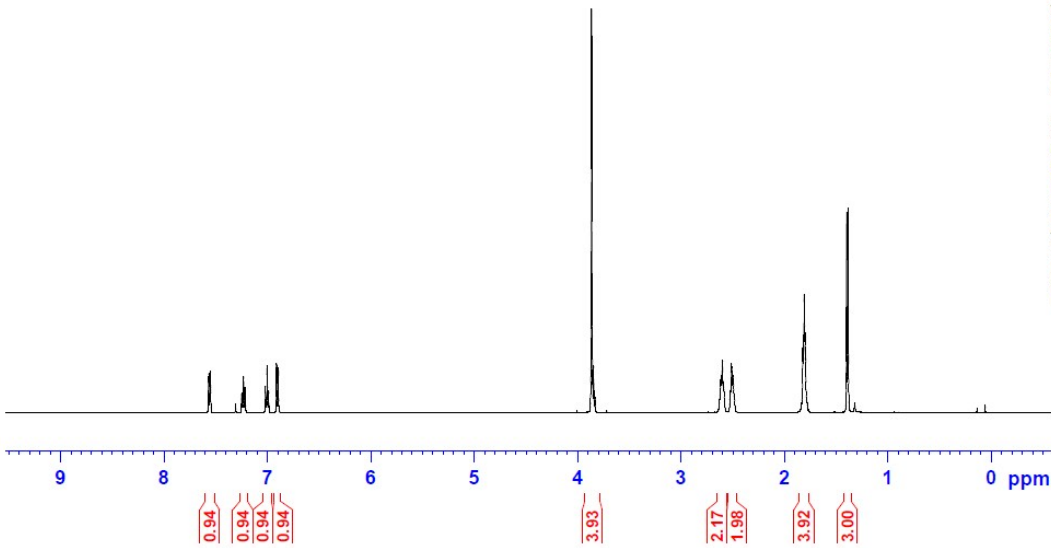

C13CPD CDCl3 3p

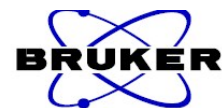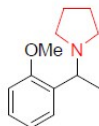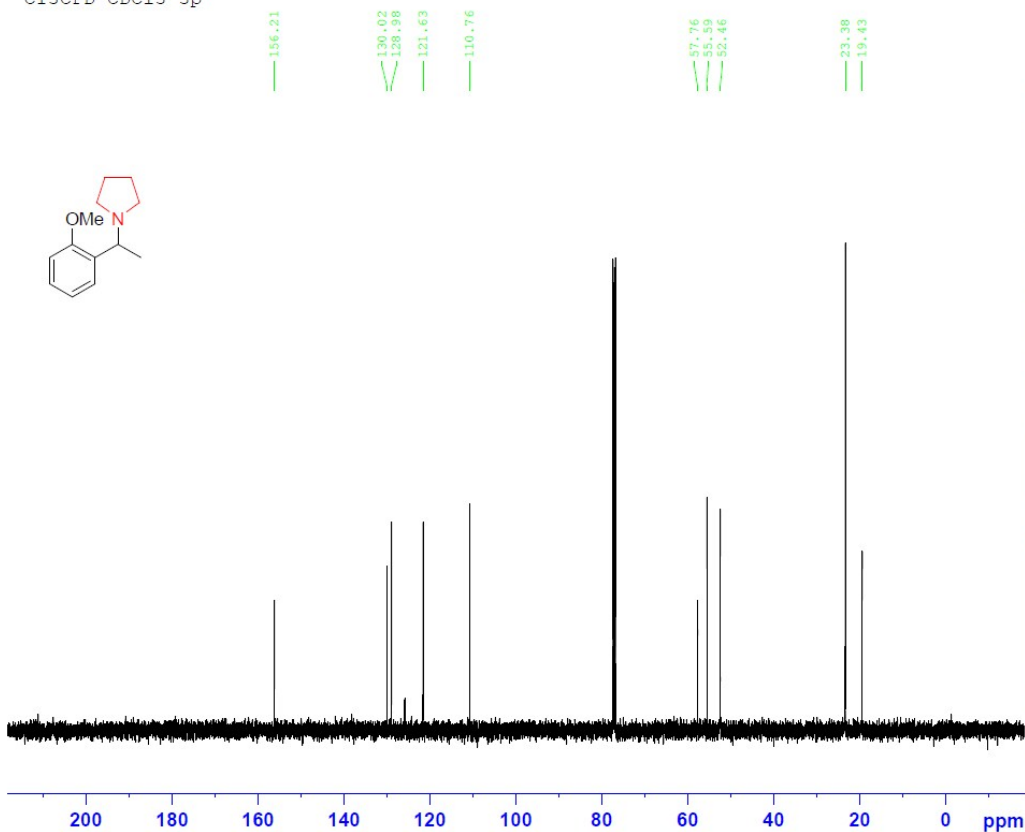

```
NAME          CMX-20190225-10
EXPNO         11
PROCNO        1
Date_         20190225
Time_         12.40
INSTRUM       spect
PROBHD        5 mm F4BBO BB-
PULPROG       zgpg30
TD            65536
SOLVENT       CDCl3
NS            21
DS            4
SWH           29761.904 Hz
FIDRES        0.454131 Hz
AQ            1.1010548 sec
RG            203
DW            16.800 usec
DE            6.50 usec
TE            300.0 K
D1            2.00000000 sec
D11           0.03000000 sec
TDO           1

===== CHANNEL f1 =====
NUC1          13C
P1            9.50 usec
PL1          -1.00 dB
PL1W         112.80287170 W
SFO1         125.7703643 MHz

===== CHANNEL f2 =====
CPDPRG2       waltz16
NUC2          1H
PCPD2         80.00 usec
PL2           0.00 dB
PL12         16.05 dB
PL13         17.00 dB
PL2W         18.83080864 W
PL12W        0.46759412 W
PL13W        0.37572402 W
SFO2         500.1320005 MHz
SI            32768
SF           125.7577890 MHz
WDW           EM
SSB           0
LB            1.00 Hz
GB            0
PC            1.40
```

PROTON CDC13 3q

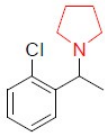

7.76  
7.74  
7.36  
7.35  
7.32  
7.31  
7.29  
7.20  
7.19  
7.17  
7.17

3.97  
3.95  
3.94  
3.93

2.70  
2.57

1.87  
1.85  
1.84  
1.45  
1.43

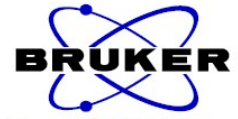

NAME CMX-20190227-7  
EXPNO 10  
PROCNO 1  
Date\_ 20190227  
Time\_ 17.41  
INSTRUM spect  
PROBHD 5 mm PABBO BB-  
PULPROG zg30  
TD 65536  
SOLVENT CDC13  
NS 8  
DS 2  
SWH 10330.578 Hz  
FIDRES 0.157632 Hz  
AQ 3.1719923 sec  
RG 40.3  
DW 48.400 usec  
DE 6.50 usec  
TE 297.1 K  
D1 1.00000000 sec  
TD0 1

===== CHANNEL f1 =====  
NUC1 1H  
P1 12.60 usec  
PL1 0.00 dB  
PL1W 18.83080864 W  
SF01 500.1330885 MHz  
SI 32768  
SF 500.1300000 MHz  
WDW EM  
SSB 0  
LB 0.30 Hz  
GB 0  
PC 1.00

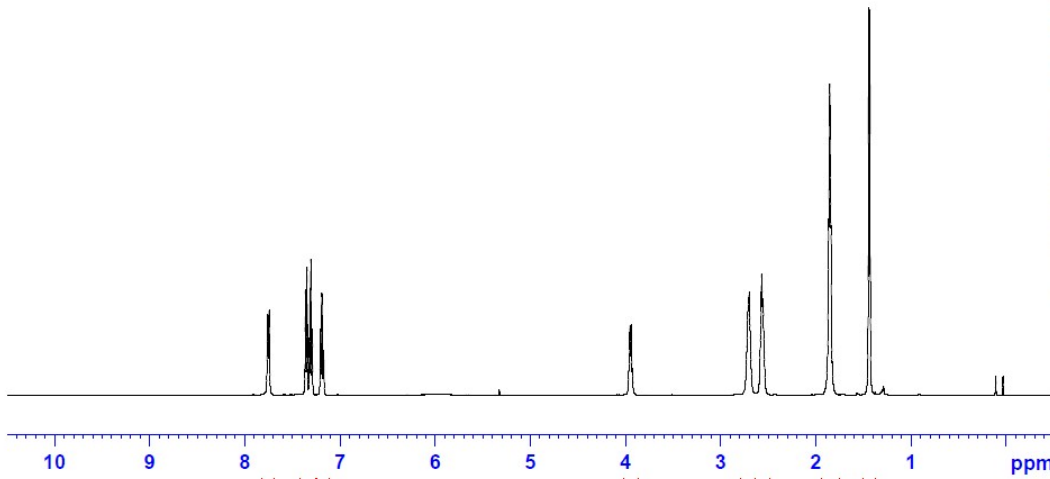

C13CPD CDC13 3q

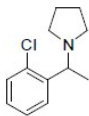

142.09  
132.59  
129.34  
128.82  
127.85  
127.23

60.99  
52.80

23.49  
21.93

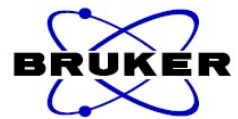

NAME CMX-20180719-15  
EXPNO 10  
PROCNO 1  
Date\_ 20180719  
Time\_ 12.09  
INSTRUM spect  
PROBHD 5 mm PABBO BB-  
PULPROG zgpg30  
TD 65536  
SOLVENT CDC13  
NS 48  
DS 4  
SWH 29761.904 Hz  
FIDRES 0.454131 Hz  
AQ 1.1010548 sec  
RG 203  
DW 16.800 usec  
DE 6.50 usec  
TE 303.7 K  
D1 2.00000000 sec  
D11 0.03000000 sec  
TD0 1

===== CHANNEL f1 =====  
NUC1 13C  
P1 9.50 usec  
PL1 -1.00 dB  
PL1W 112.80287170 W  
SF01 125.7703643 MHz

===== CHANNEL f2 =====  
CPDPRG2 waltz16  
NUC2 1H  
PCPD2 80.00 usec  
PL2 0.00 dB  
PL12 16.05 dB  
PL13 17.00 dB  
PL2W 18.83080864 W  
PL12W 0.46759412 W  
PL13W 0.37572402 W  
SF02 500.1320000 MHz  
SI 32768  
SF 125.7577890 MHz  
WDW EM  
SSB 0  
LB 1.00 Hz  
GB 0  
PC 1.40

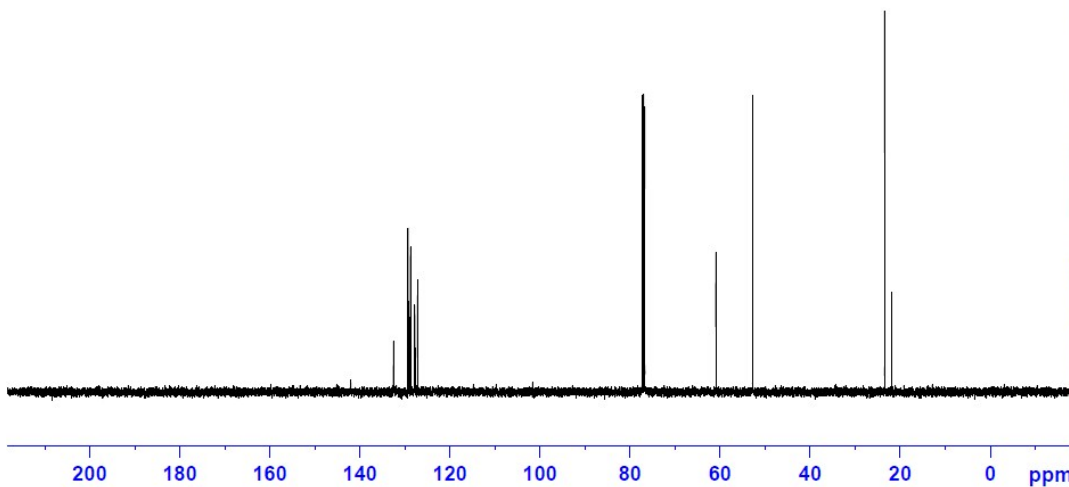



86 #11 RT: 0.15 AV: 1 NL: 8.84E8  
 T: FTMS + p ESI Full ms [150.00-2000.00]

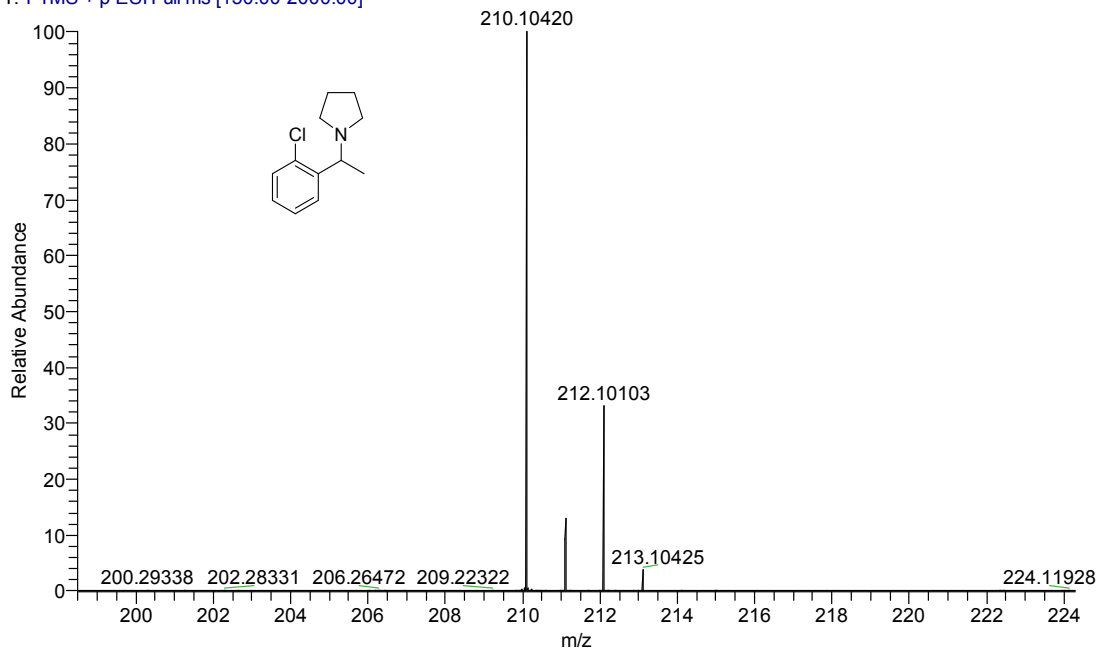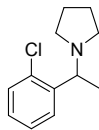

PROTON CDC13 3p

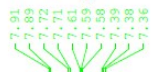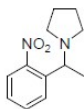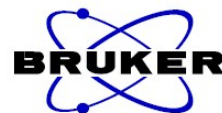

```

NAME      CMX-20180704-20
EXPNO     10
PROCNO    1
Date_     20180704
Time      14.38
INSTRUM   spect
PROBHD    5 mm PABBO BB-
PULPROG   zg30
TD        65536
SOLVENT   CDCl3
NS        16
DS        2
SWH       10330.578 Hz
FIDRES    0.157632 Hz
AQ        3.1719923 sec
RG        90.5
DW        48.400 usec
DE        6.50 usec
TE        302.0 K
D1        1.00000000 sec
TDO       1
  
```

```

===== CHANNEL f1 =====
NUC1      1H
P1        12.60 usec
PL1       0.00 dB
PL1W      18.83080864 W
SFO1      500.1330885 MHz
SI        32768
SF        500.1300000 MHz
WDW       EM
SSB       0
LB        0.30 Hz
GB        0
PC        1.00
  
```

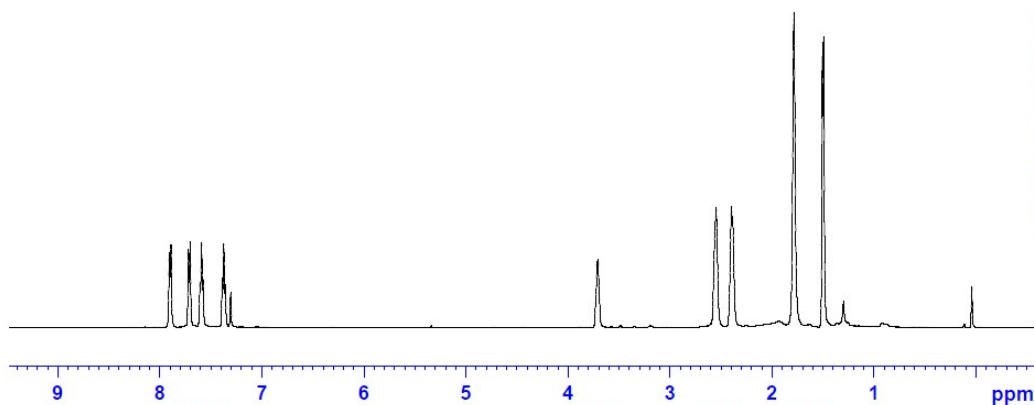

Integration values: 0.93, 0.95, 0.98, 0.94, 0.96, 2.00, 2.03, 4.06, 3.00

C13CPD CDC13 3r

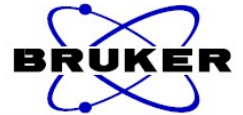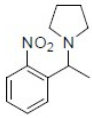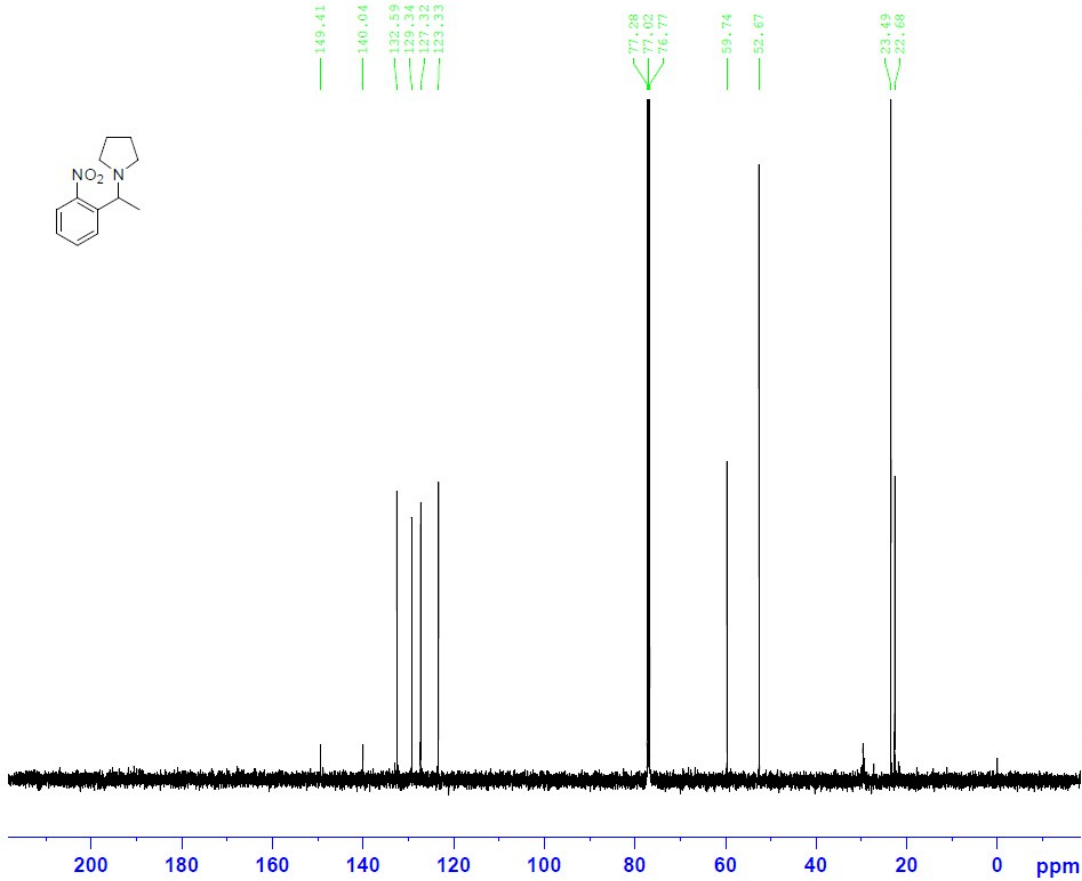

```
NAME      CMX-20180801-2
EXPNO    12
PROCNO   1
Date_    20180801
Time     10.59
INSTRUM  spect
PROBHD   5 mm PABBO BB-
PULPROG  zgpg30
TD       65536
SOLVENT  CDC13
NS       1024
DS       4
SWH      29761.904 Hz
FIDRES   0.454131 Hz
AQ       1.1010548 sec
RG       203
DW       16.800 usec
DE       6.50 usec
TE       304.7 K
D1       0.60000002 sec
D11      0.03000000 sec
TD0      1
```

```
===== CHANNEL f1 =====
NUC1     13C
P1       9.50 usec
PL1     -1.00 dB
PL1W    112.80287170 W
SFO1    125.7703643 MHz
```

```
===== CHANNEL f2 =====
CPDPRG2  waltz16
NUC2      1H
PCPD2    80.00 usec
PL2      0.00 dB
PL12    16.05 dB
PL13    17.00 dB
PL2W    18.83080864 W
PL12W   0.46759412 W
PL13W   0.37572402 W
SFO2    500.1320005 MHz
SI       32768
SF      125.7577890 MHz
WDW      EM
SSB      0
LB       1.00 Hz
GB       0
PC       1.40
```

33#10 RT: 0.12 AV: 1 NL: 6.16E8  
T: FTMS + p ESI Full ms [150.00-2000.00]

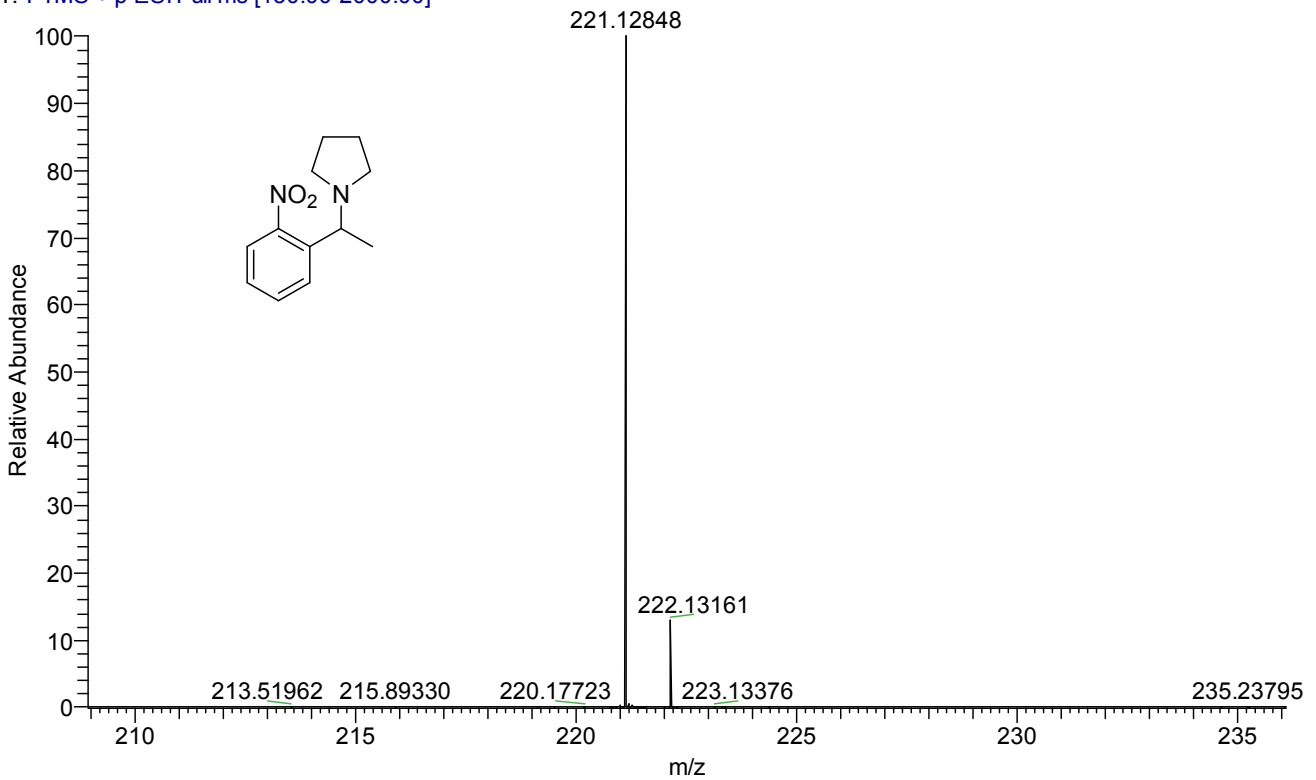

PROTON CDC13 3s

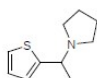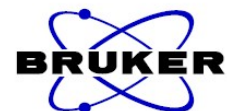

```

NAME      CMX-20180725-9
EXPNO     10
PROCNO    1
Date_     20180725
Time      14.14
INSTRUM   spect
PROBHD    5 mm PABBO BB-
PULPROG   zg30
TD        65536
SOLVENT   CDC13
NS        16
DS        2
SWH       10330.578 Hz
FIDRES    0.157632 Hz
AQ        3.1719923 sec
RG        71.8
DW        48.400 usec
DE        6.50 usec
TE        303.0 K
D1        1.00000000 sec
TD0       1

===== CHANNEL f1 =====
NUC1      1H
P1        12.60 usec
PL1       0.00 dB
PL1W      18.83080864 W
SFO1      500.1330885 MHz
SI        32768
SF        500.1300000 MHz
WDW       EM
SSB       0
LB        0.30 Hz
GB        0
PC        1.00
    
```

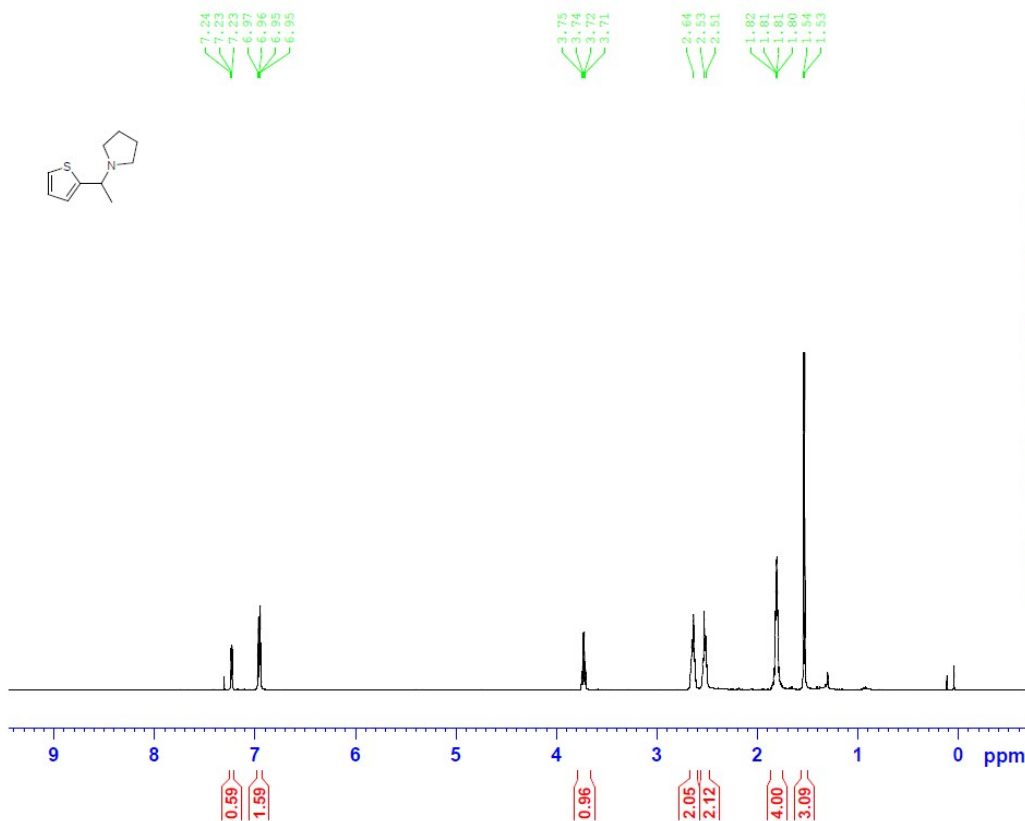

C13CPD CDC13 3s

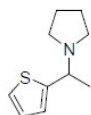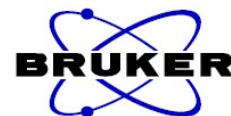

```

NAME      CMX-20180731-4
EXPNO     11
PROCNO    1
Date_     20180731
Time      11.26
INSTRUM   spect
PROBHD    5 mm PABBO BB-
PULPROG   zgpg30
TD        65536
SOLVENT   CDC13
NS        128
DS        4
SWH       29761.904 Hz
FIDRES    0.454131 Hz
AQ        1.1010548 sec
RG        203
DW        16.800 usec
DE        6.50 usec
TE        304.7 K
D1        2.00000000 sec
D11       0.03000000 sec
TD0       1

===== CHANNEL f1 =====
NUC1      13C
P1        9.50 usec
PL1       -1.00 dB
PL1W      112.80287170 W
SFO1      125.7703643 MHz

===== CHANNEL f2 =====
CPDPRG2   waltz16
NUC2      1H
PCPD2     80.00 usec
PL2       0.00 dB
PL12      16.05 dB
PL13      17.00 dB
PL2W      18.83080864 W
PL12W     0.46758412 W
PL13W     0.37572402 W
SFO2      500.1320005 MHz
SI        32768
SF        125.7577890 MHz
WDW       EM
SSB       0
LB        1.00 Hz
GB        0
PC        1.40
    
```

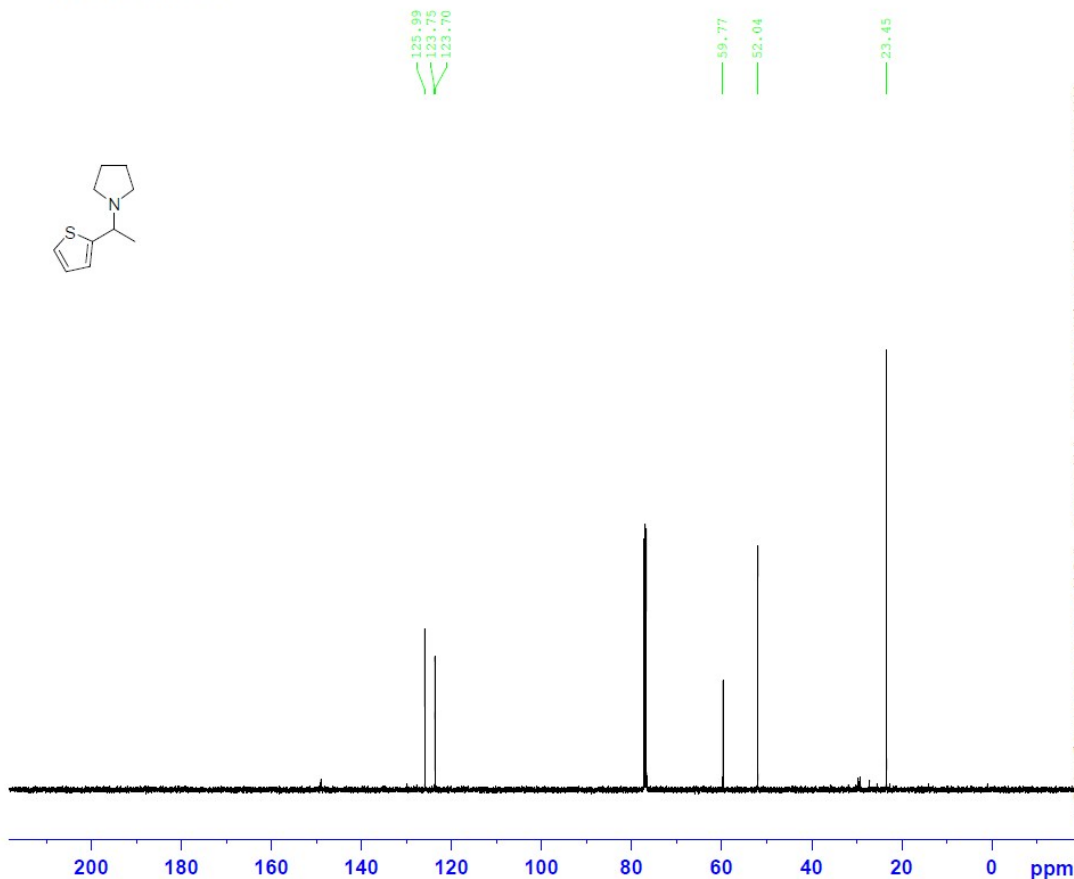

34 #12 RT: 0.16 AV: 1 NL: 2.04E8  
 T: FTMS + p ESI Full ms [150.00-2000.00]

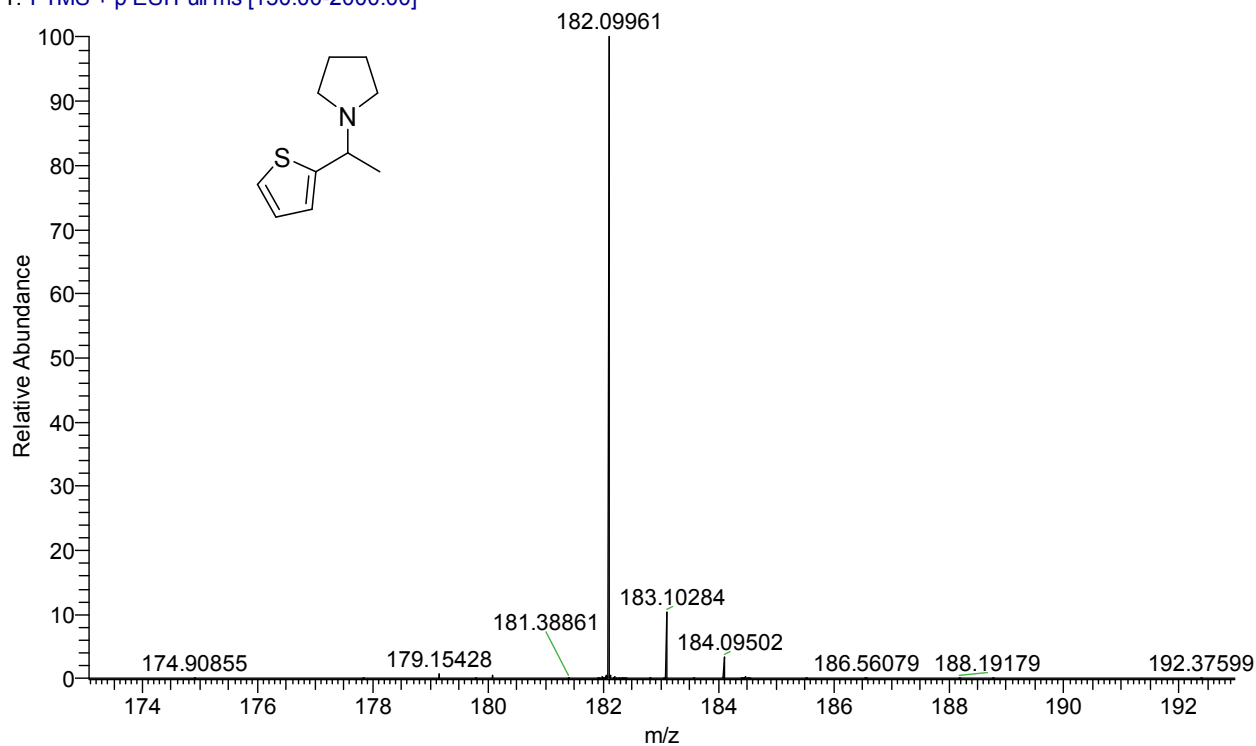

PROTON CDC13 3t

8.52  
8.31  
7.94  
7.92  
7.80  
7.55  
7.53

4.07

2.69

2.57

1.86

1.61

1.60

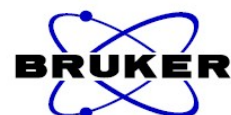

```

NAME      CMX-20180123-13
EXPNO     10
PROCNO    1
Date_     20180124
Time      10.34
INSTRUM   spect
PROBHD    5 mm PABBO BB-
PULPROG   zg30
TD         65536
SOLVENT   CDC13
NS         12
DS         2
SWH       10330.578 Hz
FIDRES    0.157632 Hz
AQ         3.1719923 sec
RG         32
DW         48.400 usec
DE         6.50 usec
TE         300.0 K
D1         1.0000000 sec
TD0        1
  
```

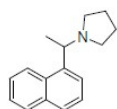

```

===== CHANNEL f1 =====
NUC1      1H
P1        12.60 usec
PL1       0.00 dB
PL1W      18.83080864 W
SFO1      500.1330885 MHz
SI         32768
SF         500.1300000 MHz
WDW        EM
SSB        0
LB         0.30 Hz
GB         0
PC         1.00
  
```

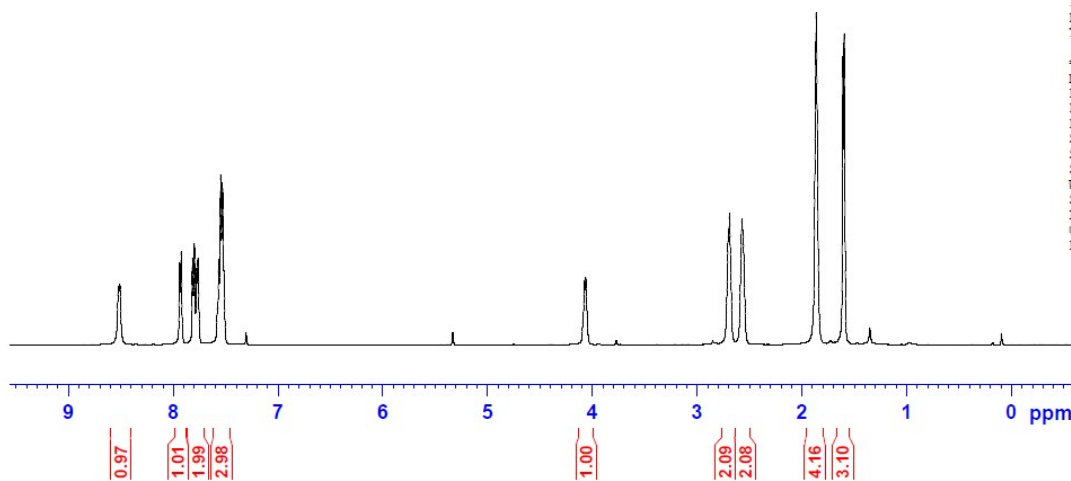

C13CPD CDCl3 3t

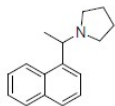

141.83  
134.01  
131.11  
128.85  
127.03  
125.48  
125.19  
124.56  
123.73

62.37

53.14

23.63

22.89

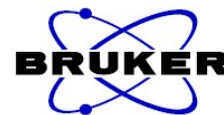

NAME CMX-20190225-11  
EXPNO 11  
PROCNO 1  
Date\_ 20190225  
Time 12.46  
INSTRUM spect  
PROBHD 5 mm PABBO BB-  
PULPROG zgpg30  
TD 65536  
SOLVENT CDCl3  
NS 64  
DS 4  
SWH 29761.904 Hz  
FIDRES 0.454131 Hz  
AQ 1.1010548 sec  
RG 203  
DW 16.800 usec  
DE 6.50 usec  
TE 300.0 K  
D1 2.00000000 sec  
D11 0.03000000 sec  
TDO 1

===== CHANNEL f1 =====  
NUC1 13C  
P1 9.50 usec  
PL1 -1.00 dB  
PL1W 112.80287170 W  
SFO1 125.7703643 MHz

===== CHANNEL f2 =====  
CPDPRG2 waltz16  
NUC2 1H  
PCPD2 80.00 usec  
PL2 0.00 dB  
PL12 16.05 dB  
PL13 17.00 dB  
PL1W 18.83080864 W  
PL2W 0.46759412 W  
PL13W 0.37572402 W  
SFO2 500.1320005 MHz  
SI 32768  
SF 125.7577890 MHz  
WDW EM  
SSB 0  
LB 1.00 Hz  
GB 0  
PC 1.40

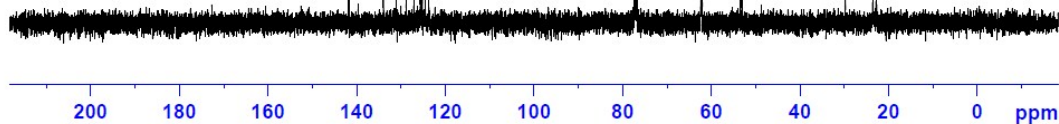

PROTON CDCl3 3u

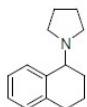

7.43  
7.41  
7.18  
7.18  
7.17  
7.16  
7.14

3.63  
3.62  
3.61  
2.95  
2.80  
2.72  
2.72  
2.71  
2.70  
2.54  
2.17  
2.16  
2.15  
2.01  
1.80

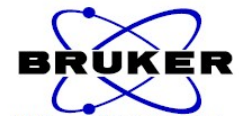

NAME CMX-20170925-6  
EXPNO 10  
PROCNO 1  
Date\_ 20170926  
Time 9.15  
INSTRUM spect  
PROBHD 5 mm PASEI 1H/  
PULPROG zg30  
TD 65536  
SOLVENT CDCl3  
NS 16  
DS 2  
SWH 10330.578 Hz  
FIDRES 0.157632 Hz  
AQ 3.1719923 sec  
RG 71.8  
DW 48.400 usec  
DE 6.50 usec  
TE 301.9 K  
D1 1.00000000 sec  
TDO 1

===== CHANNEL f1 =====  
NUC1 1H  
P1 6.80 usec  
PL1 0.00 dB  
PL1W 18.83080864 W  
SFO1 500.1330865 MHz  
SI 32768  
SF 500.1300000 MHz  
WDW EM  
SSB 0  
LB 0.30 Hz  
GB 0  
PC 1.00

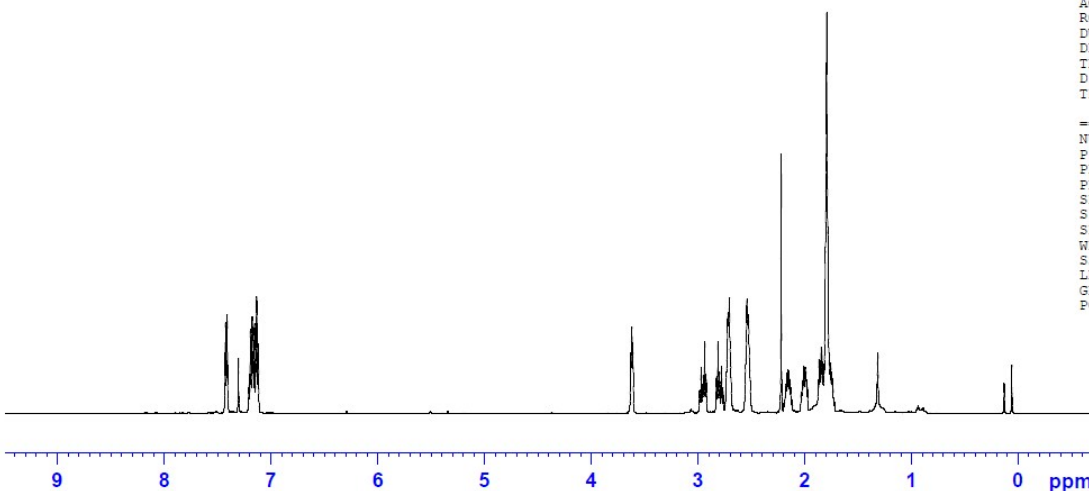

0.97  
2.87

0.96  
1.04  
1.04  
2.01  
2.00  
1.03  
1.06  
6.35

C13CPD CDC13 3u

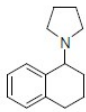

138.83  
137.71  
129.41  
129.08  
126.63  
124.37

60.74

50.36

29.08  
24.75  
23.76  
19.37

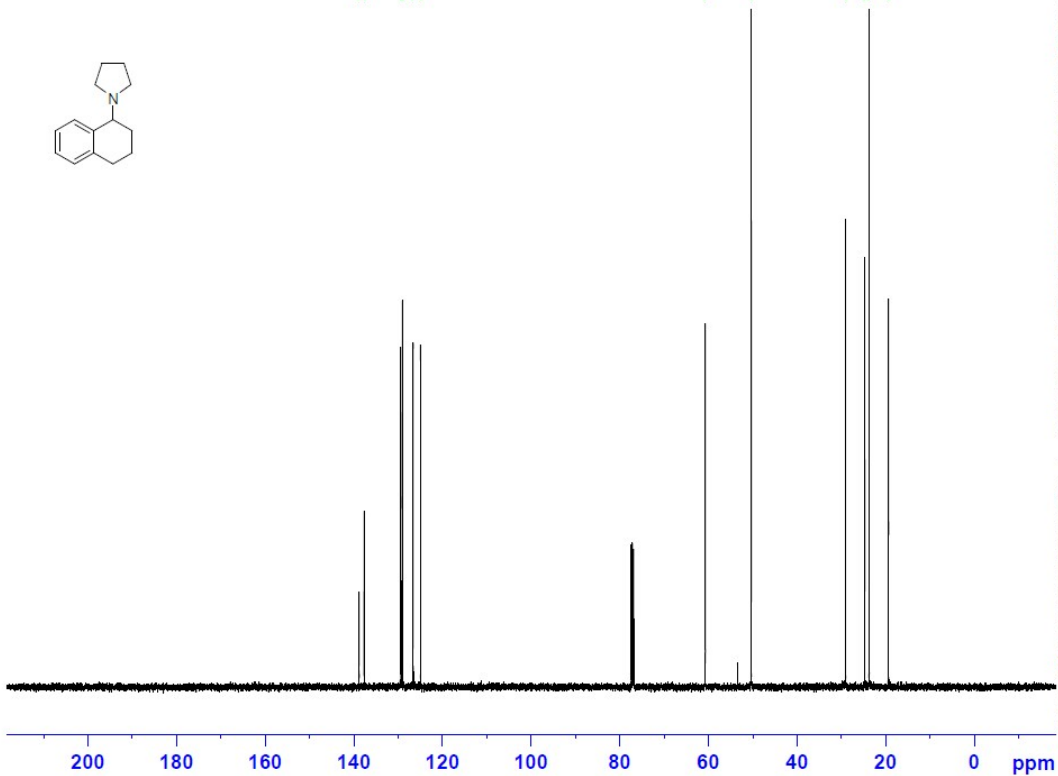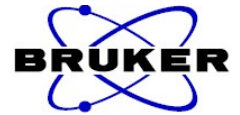

```

NAME      CMX-20190225-12
EXPNO     1
PROCNO    1
Date_     20190225
Time_     14.11
INSTRUM   spect
PROBHD    5 mm PABBO BB-
PULPROG   zgpg30
TD        65536
SOLVENT   CDC13
NS        51
DS        4
SWH       29761.904 Hz
FIDRES    0.454131 Hz
AQ        1.1010548 sec
RG        203
EW        16.800 usec
DE        6.50 usec
TE        301.5 K
D1        2.00000000 sec
D11       0.03000000 sec
TD0       1

===== CHANNEL f1 =====
NUC1      13C
P1        9.50 usec
PL1       -1.00 dB
PL1W     112.80287170 W
SFO1     125.7703643 MHz

===== CHANNEL f2 =====
CPDPRG2   waltz16
NUC2      1H
PCPD2     80.00 usec
PL2       0.00 dB
PL2W     16.05 dB
PL3       17.00 dB
PL3W     18.83080864 W
PL12W    0.46759412 W
PL13W    0.37572402 W
SFO2     500.1320005 MHz
SI        32768
SF        125.7577890 MHz
WDW       EM
SSB       0
LB        1.00 Hz
GB        0
PC        1.40
    
```

PROTON CDC13 3t

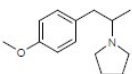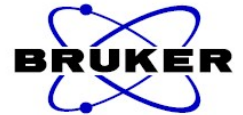

```

NAME      CMX-20180730-7
EXPNO     10
PROCNO    1
Date_     20180730
Time_     11.06
INSTRUM   spect
PROBHD    5 mm PABBO BB-
PULPROG   zg30
TD        65536
SOLVENT   CDC13
NS        16
DS        2
SWH       10330.578 Hz
FIDRES    0.157632 Hz
AQ        3.1719923 sec
RG        50.8
DW        48.400 usec
DE        6.50 usec
TE        302.6 K
D1        1.00000000 sec
TD0       1

===== CHANNEL f1 =====
NUC1      1H
P1        12.60 usec
PL1       0.00 dB
PL1W     18.83080864 W
SFO1     500.1330885 MHz
SI        32768
SF        500.1300000 MHz
WDW       EM
SSB       0
LB        0.30 Hz
GB        0
PC        1.00
    
```

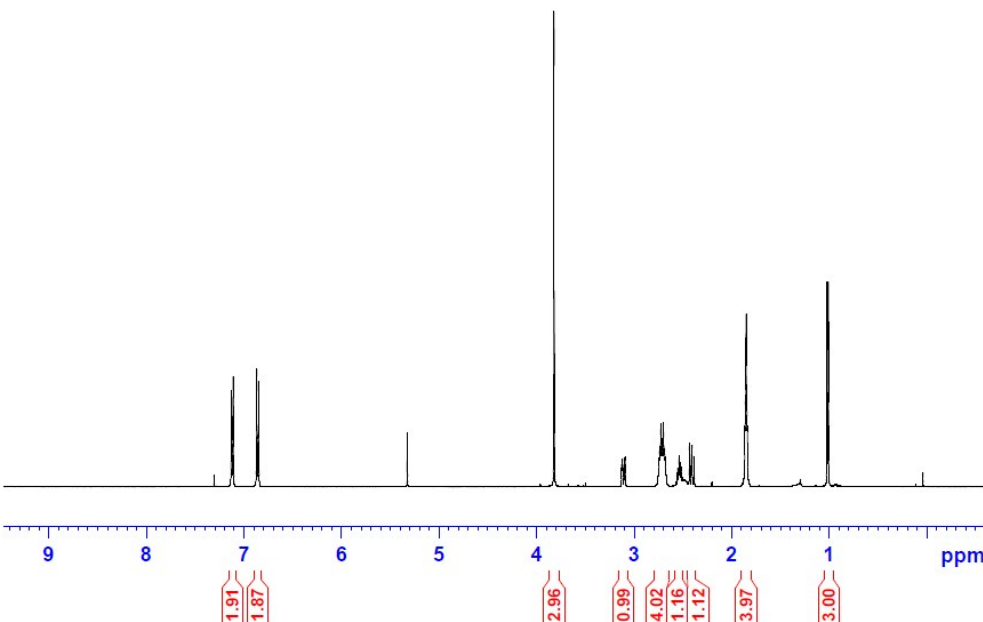

C13CPD CDCl3 3v

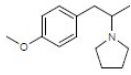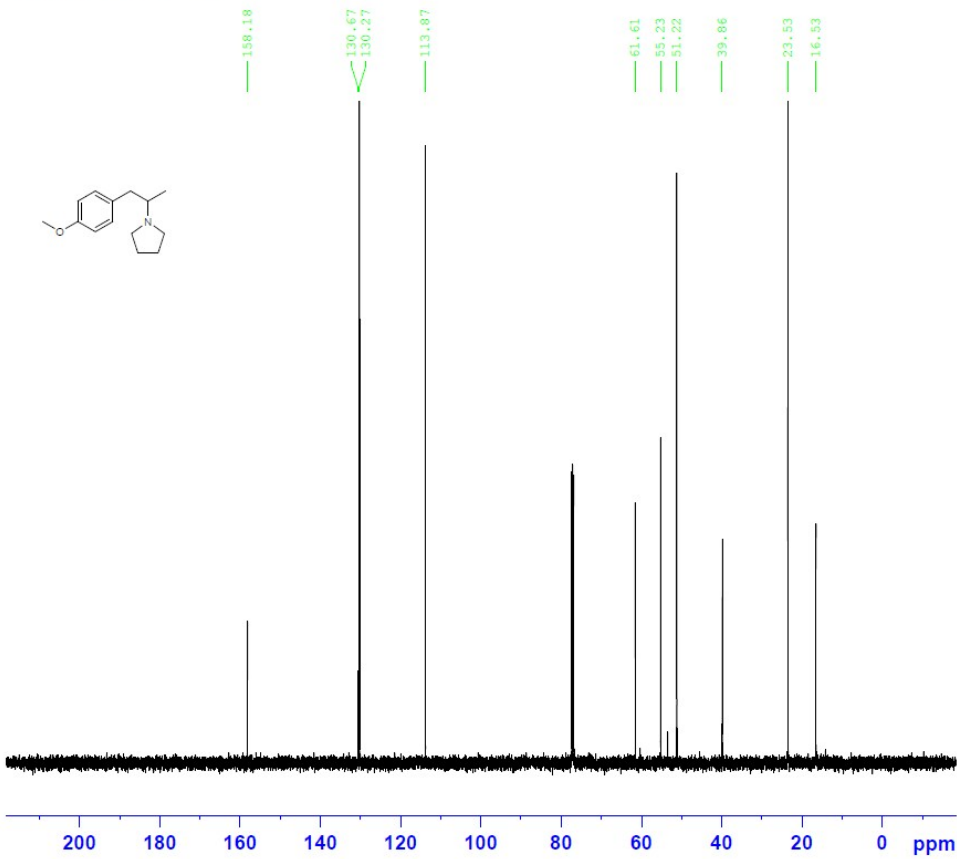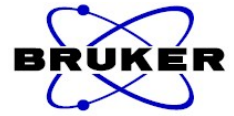

```

NAME      CMX-20190225-13
EXPNO     1
PROCNO    1
Date_     20190225
Time      14.18
INSTRUM   spect
PROBHD    5 mm PABBO BB-
PULPROG   zgpg30
TD        65536
SOLVENT   CDCl3
NS        40
DS        4
SWH       29761.904 Hz
FIDRES    0.454131 Hz
AQ        1.1010548 sec
RG        203
DW        16.800 usec
DE        6.50 usec
TE        300.8 K
D1        2.00000000 sec
D11       0.03000000 sec
TD0       1

```

```

===== CHANNEL f1 =====
NUC1      13C
P1        9.50 usec
PL1       -1.00 dB
PL1W     112.80287170 W
SFO1     125.7703643 MHz

```

```

===== CHANNEL f2 =====
CPDPRG2   waltz16
NUC2      1H
PCPD2     80.00 usec
PL2       0.00 dB
PL12     16.05 dB
PL13     17.00 dB
PL2W     18.83080864 W
PL12W    0.46759412 W
PL13W    0.37572402 W
SFO2     500.1320005 MHz
SI        32768
SF       125.7577890 MHz
WDW       EM
SSB       0
LB        1.00 Hz
GB        0
PC        1.40

```

PROTON CDCl3 3u

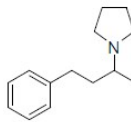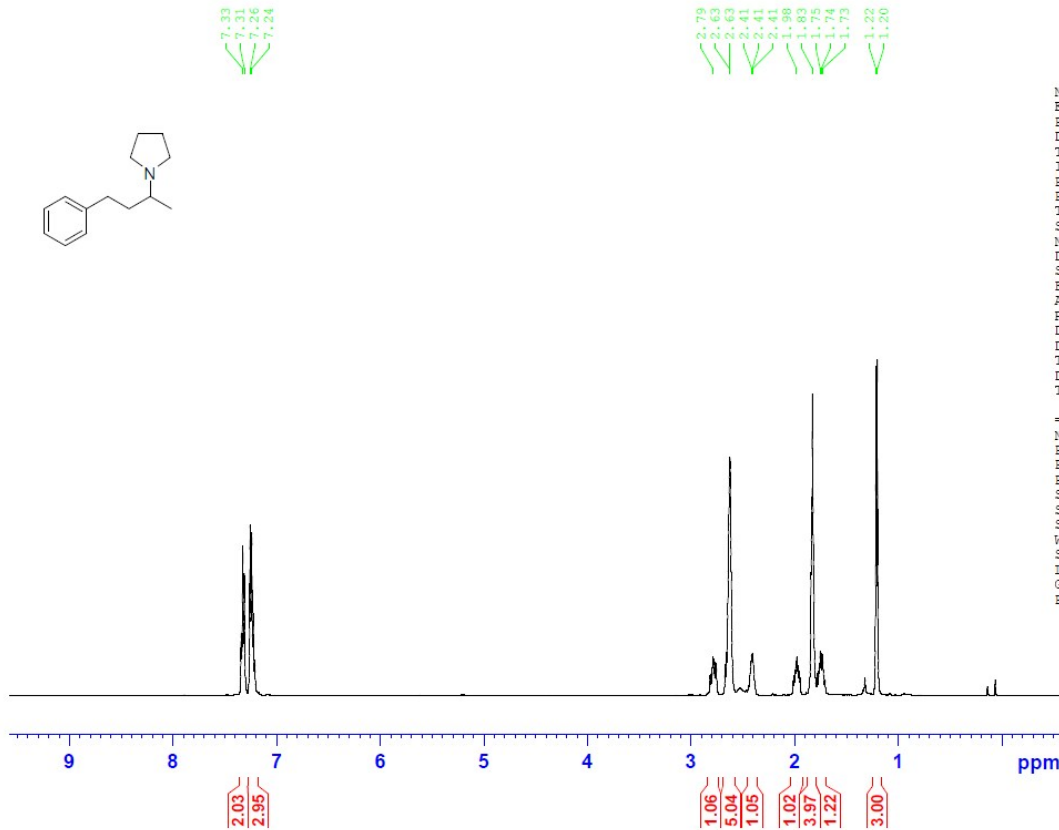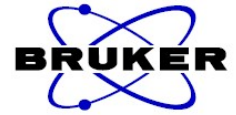

```

NAME      CMX-20170919-6
EXPNO     10
PROCNO    1
Date_     20170919
Time      11.32
INSTRUM   spect
PROBHD    5 mm PABBO BB-
PULPROG   zg30
TD        65536
SOLVENT   CDCl3
NS        16
DS        2
SWH       10330.578 Hz
FIDRES    0.157632 Hz
AQ        3.1719923 sec
RG        36
DW        48.400 usec
DE        6.50 usec
TE        303.4 K
D1        1.00000000 sec
TD0       1

```

```

===== CHANNEL f1 =====
NUC1      1H
P1        12.60 usec
PL1       0.00 dB
PL1W     18.83080864 W
SFO1     500.1330885 MHz
SI        32768
SF       500.1300000 MHz
WDW       EM
SSB       0
LB        0.30 Hz
GB        0
PC        1.00

```

C13CPD CDC13 3w

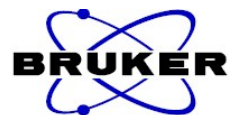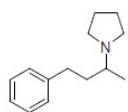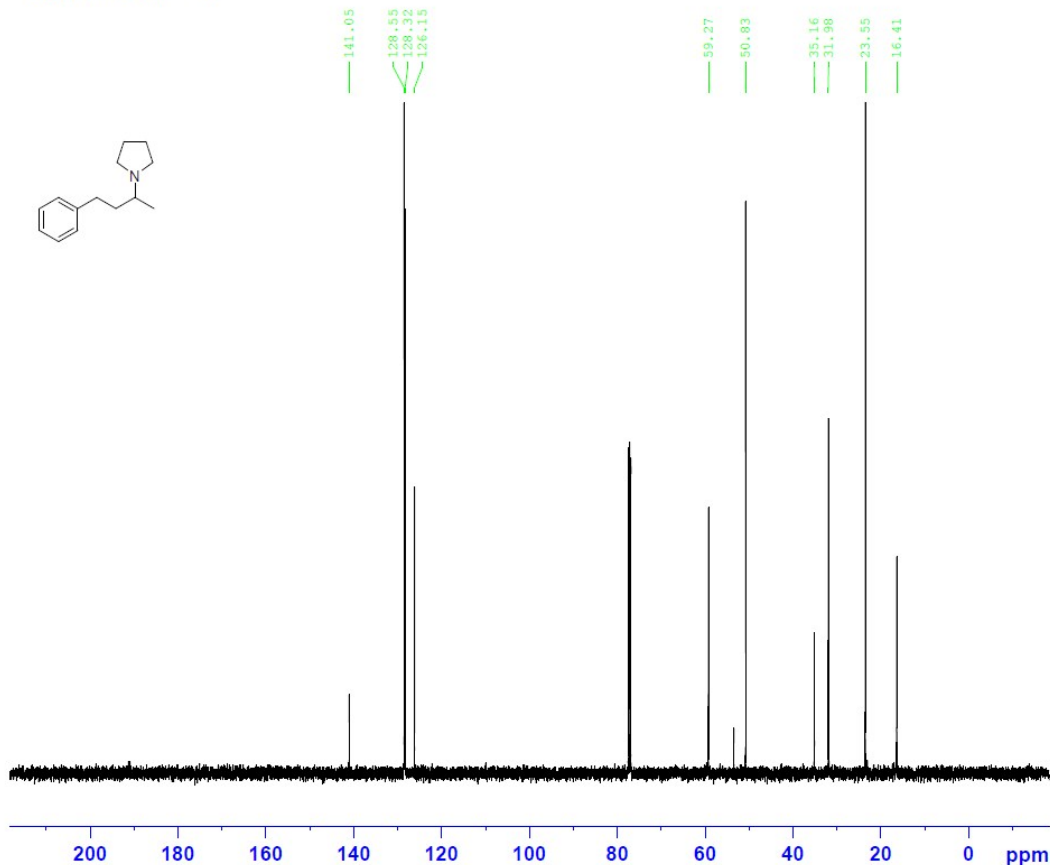

```

NAME      CMX-20190225-14
EXPNO     1
PROCNO    1
Date_     20190225
Time      14.27
INSTRUM   spect
PROBHD    5 mm PABBO BB-
PULPROG   zgpg30
TD         65536
SOLVENT   CDC13
NS         47
DS         4
SWH        29761.904 Hz
FIDRES     0.454131 Hz
AQ         1.1010548 sec
RG         203
DW         16.800 usec
DE         6.50 usec
TE         301.1 K
D1         2.00000000 sec
D11        0.03000000 sec
TD0        1

===== CHANNEL f1 =====
NUC1      13C
P1         9.50 usec
PL1        -1.00 dB
PL1W       112.80287170 W
SFO1       125.7703643 MHz

===== CHANNEL f2 =====
CPDPRG2   waltz16
NUC2       1H
PCPD2     80.00 usec
PL2        0.00 dB
PL12       16.05 dB
PL13       17.00 dB
PL2W       18.83080864 W
PL12W      0.46759412 W
PL13W      0.37572402 W
SFO2       500.1320005 MHz
SI         32768
SF         125.7577890 MHz
WDW        EM
SSB        0
LB         1.00 Hz
GB         0
PC         1.40
    
```

PROTON CDC13 3ab

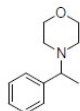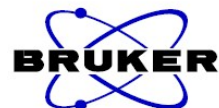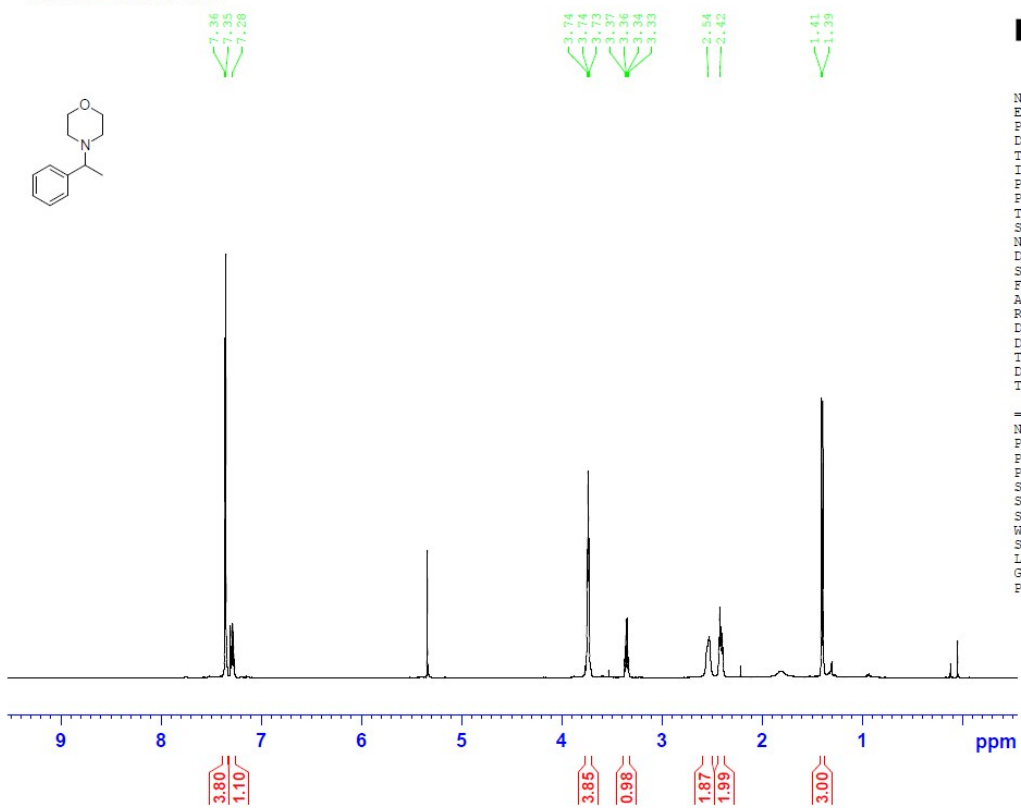

```

NAME      CMX-20180730-5
EXPNO     10
PROCNO    1
Date_     20180730
Time      10.56
INSTRUM   spect
PROBHD    5 mm PABBO BB-
PULPROG   zg30
TD         65536
SOLVENT   CDC13
NS         16
DS         2
SWH        10330.578 Hz
FIDRES     0.157632 Hz
AQ         3.1719923 sec
RG         80.6
DW         48.400 usec
DE         6.50 usec
TE         302.8 K
D1         1.00000000 sec
TD0        1

===== CHANNEL f1 =====
NUC1       1H
P1         12.60 usec
PL1        0.00 dB
PL1W       18.83080864 W
SFO1       500.1330895 MHz
SI         32768
SF         500.1300000 MHz
WDW        EM
SSB        0
LB         0.30 Hz
GB         0
PC         1.00
    
```



C13CPD CDC13 3ab

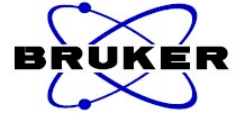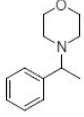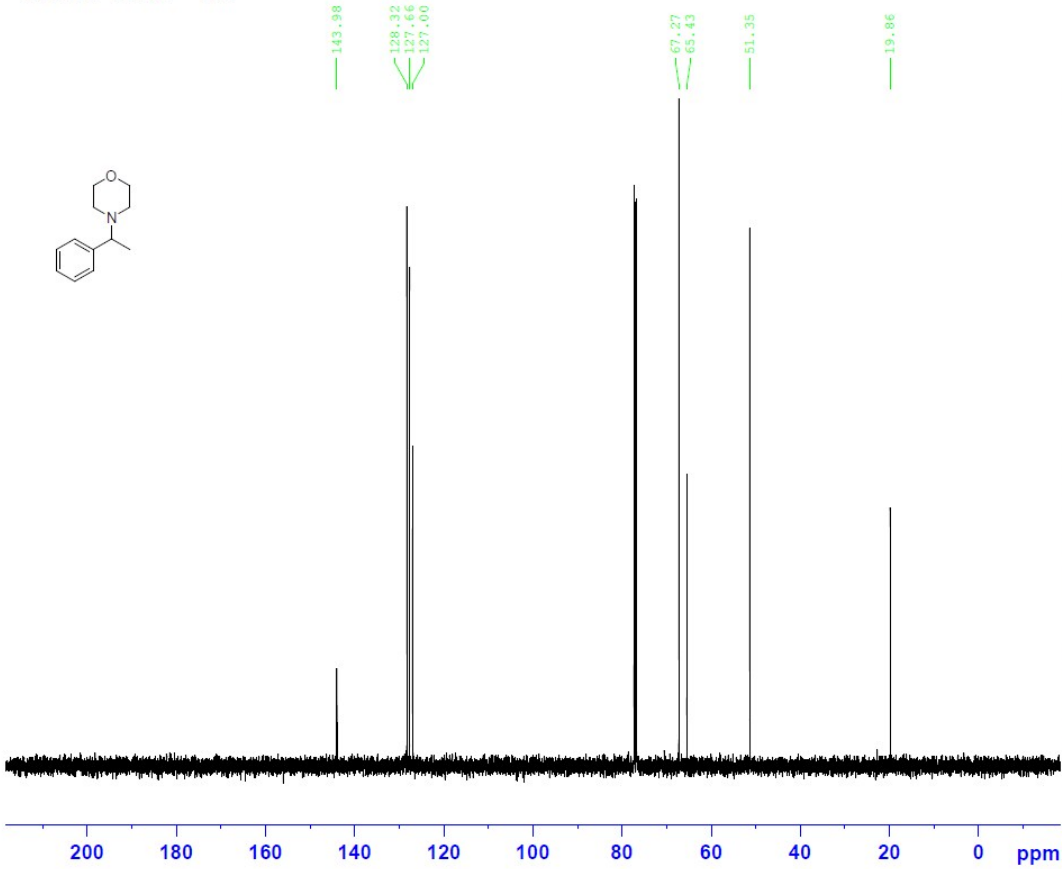

```
NAME CMX-20190225-21
EXPNO 11
PROCNO 1
Date_ 20190225
Time_ 15.41
INSTRUM spect
PROBHD 5 mm PABBO BB-
PULPROG zgpg30
TD 65536
SOLVENT CDC13
NS 64
DS 4
SWH 29761.904 Hz
FIDRES 0.454131 Hz
AQ 1.1010548 sec
RG 203
DW 16.800 usec
DE 6.50 usec
TE 300.4 K
D1 2.00000000 sec
D11 0.03000000 sec
TD0 1

===== CHANNEL f1 =====
NUC1 13C
P1 9.50 usec
PL1 -1.00 dB
PL1W 112.80287170 W
SFO1 125.7703643 MHz

===== CHANNEL f2 =====
CPDPRG2 waltz16
NUC2 1H
PCPD2 80.00 usec
PL2 0.00 dB
PL12 16.05 dB
PL13 17.00 dB
PL2W 18.83080864 W
PL12W 0.46759412 W
PL13W 0.37572402 W
SFO2 500.1320005 MHz
SI 32768
SF 125.7577890 MHz
WDW EM
SSB 0
LB 1.00 Hz
GB 0
PC 1.40
```

PROTON CDC13 for 3ac

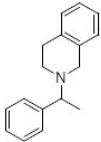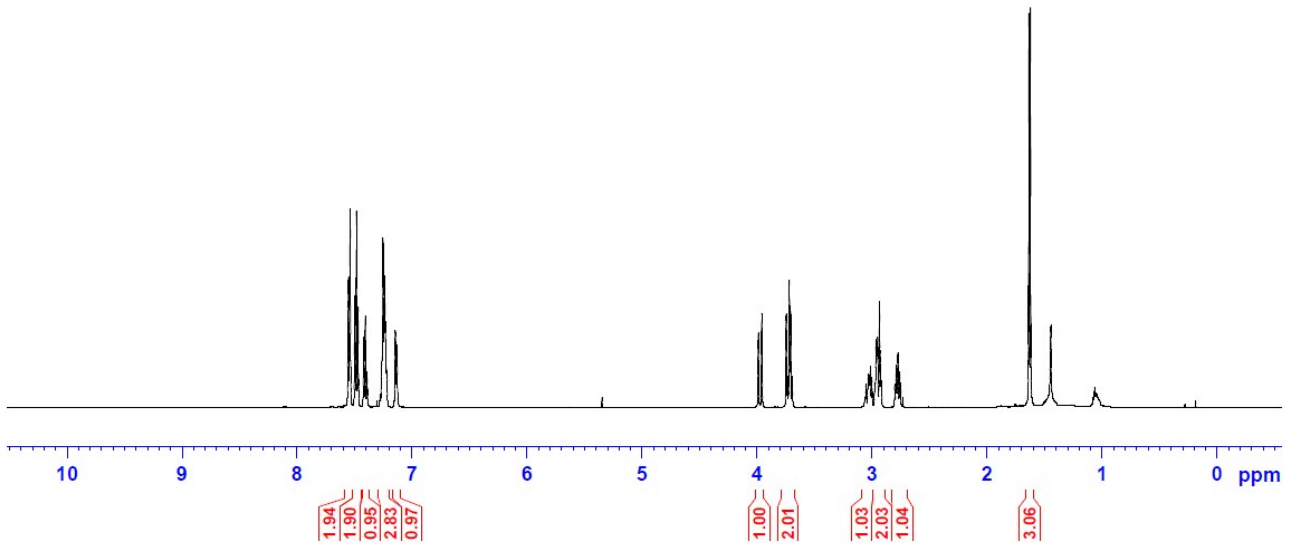

C13CPD CDC13 3ac

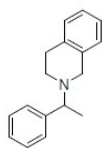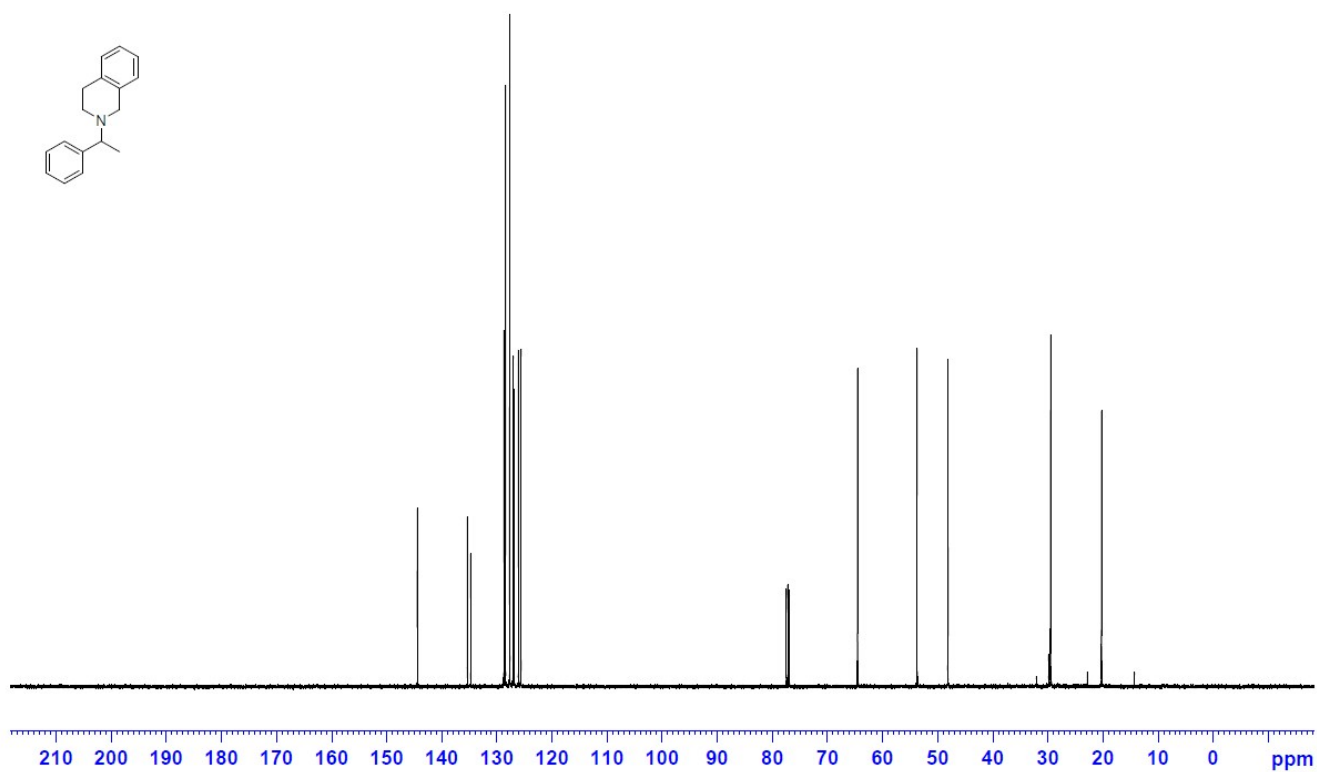

PROTON CDC13 for 3ad

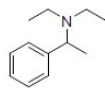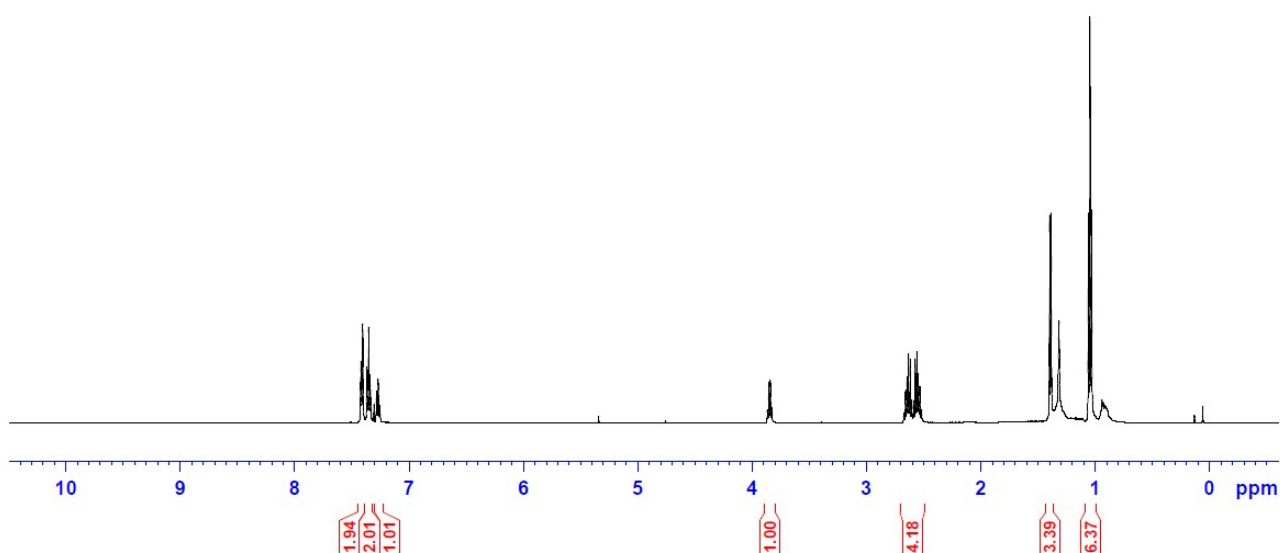

C13CPD CDCl3 3ad

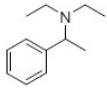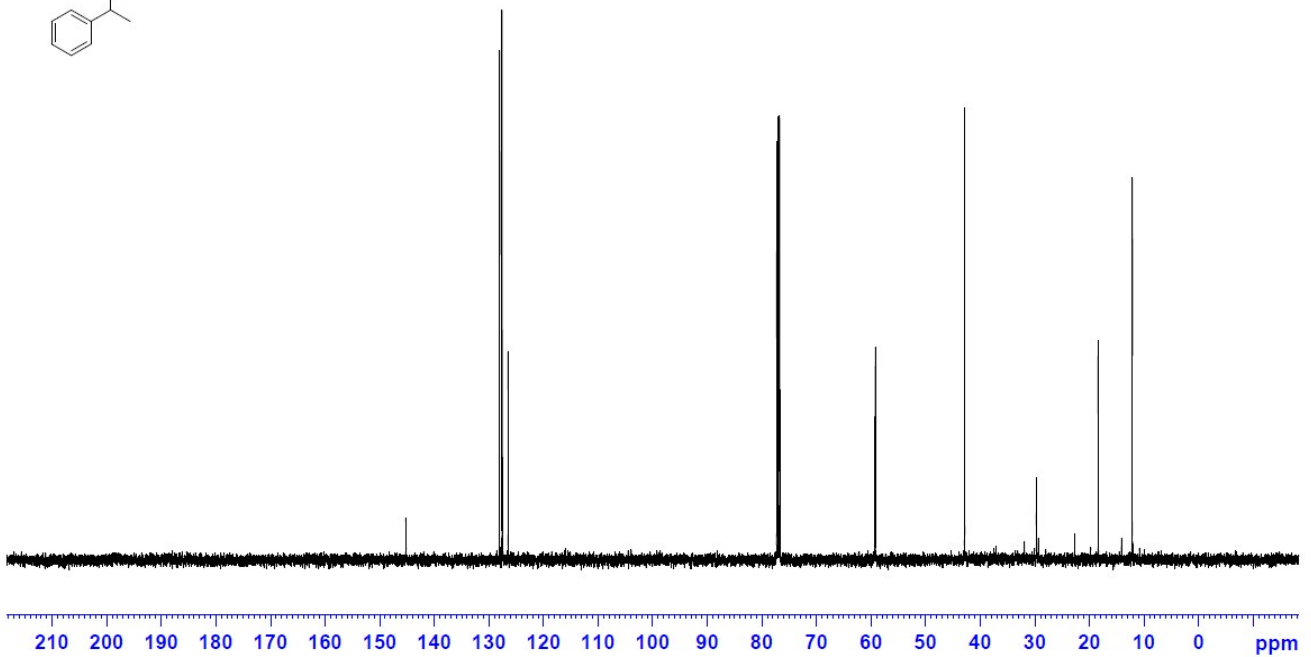

PROTON CDCl3 for 3ae

7.42  
7.41  
7.36  
7.35  
7.31  
7.26

3.90  
3.89  
3.88  
3.86

2.48  
2.47  
2.46  
2.44  
2.39  
2.38  
2.35

1.49  
1.47  
1.38  
1.37  
0.89  
0.86

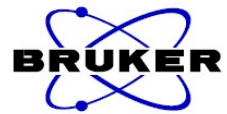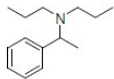

```
NAME CMX-20181214-10
EXPNO 20
PROCNO 1
Date_ 20181214
Time 10.14
INSTRUM spect
PROBHD 5 mm FAPBO BB-
PULPROG zg30
TD 65536
SOLVENT CDCl3
NS 16
DS 2
SWH 10330.578 Hz
FIDRES 0.157632 Hz
AQ 3.1719923 sec
RG 64
DW 48.400 usec
DE 6.50 usec
TE 298.0 K
D1 1.00000000 sec
TD0 1
===== CHANNEL f1 =====
NUC1 1H
P1 12.60 usec
PL1 0.00 dB
PL1W 18.83080864 W
SF01 500.1330885 MHz
SI 32768
SF 500.1300000 MHz
WDW EM
SSB 0
LB 0.30 Hz
GB 0
PC 1.00
```

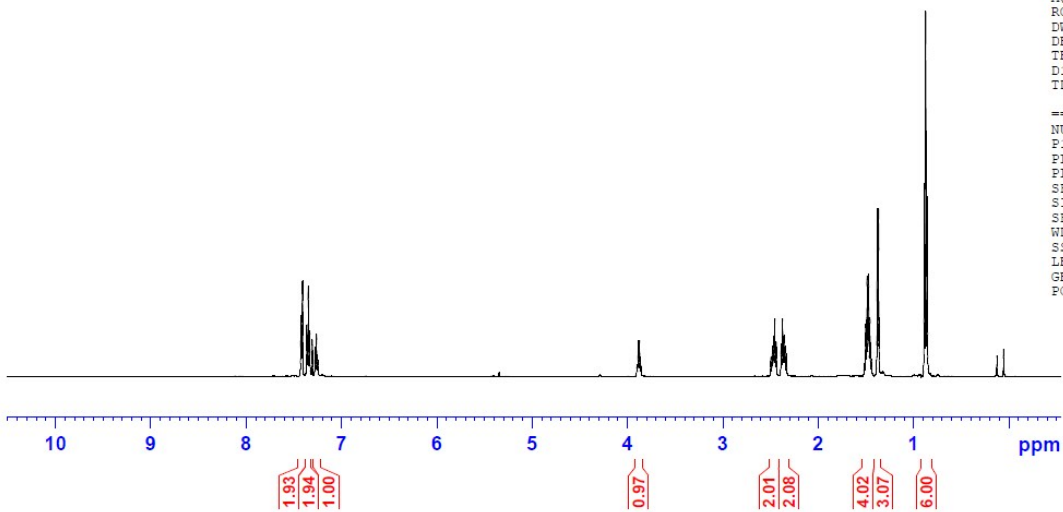



C13CPD CDC13 3af

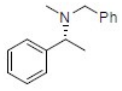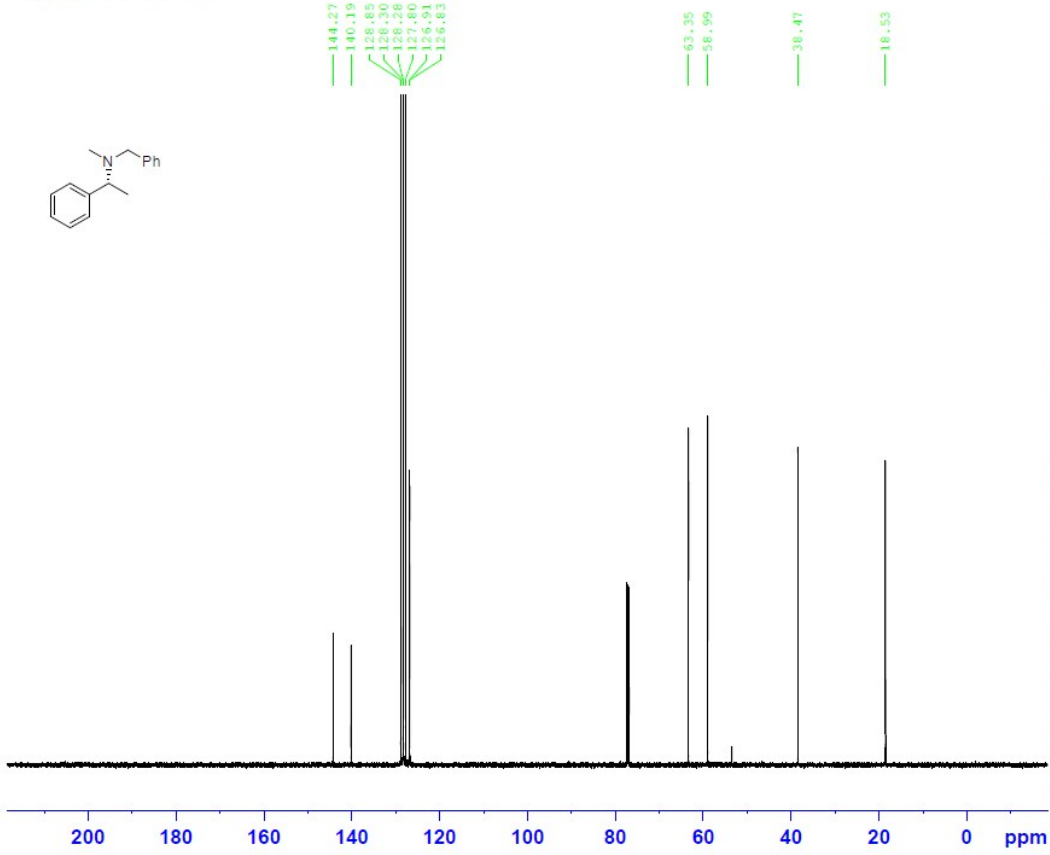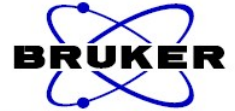

```

NAME      CMX-20190302-22
EXPNO    10
PROCNO   1
Date_    20190302
Time_    11.17
INSTRUM  spect
PROBHD   5 mm F4BBO BB-
PULPROG  zgpg30
TD        65536
SOLVENT  CDCl3
NS        16
DS        4
SWH       29761.904 Hz
FIDRES    0.454131 Hz
AQ        1.1010548 sec
RG        203
DW        16.800 usec
DE        6.50 usec
TE        298.5 K
D1        2.00000000 sec
D11       0.03000000 sec
TD0       1

===== CHANNEL f1 =====
NUC1      13C
P1        9.50 usec
PL1       -1.00 dB
PL1W      112.80287170 W
SFO1      125.7703643 MHz

===== CHANNEL f2 =====
CPDPRG2   waltz16
NUC2      1H
PCPD2     80.00 usec
PL2        0.00 dB
PL12       16.05 dB
PL13       17.00 dB
PL2W      18.83080864 W
PL12W     0.467589412 W
PL13W     0.37572402 W
SFO2      500.1320000 MHz
SI        32768
SF        125.7577890 MHz
WDW       EM
SSB       0
LB        1.00 Hz
GB        0
PC        1.40
    
```

PROTON CDC13 for 3ag

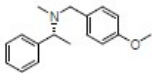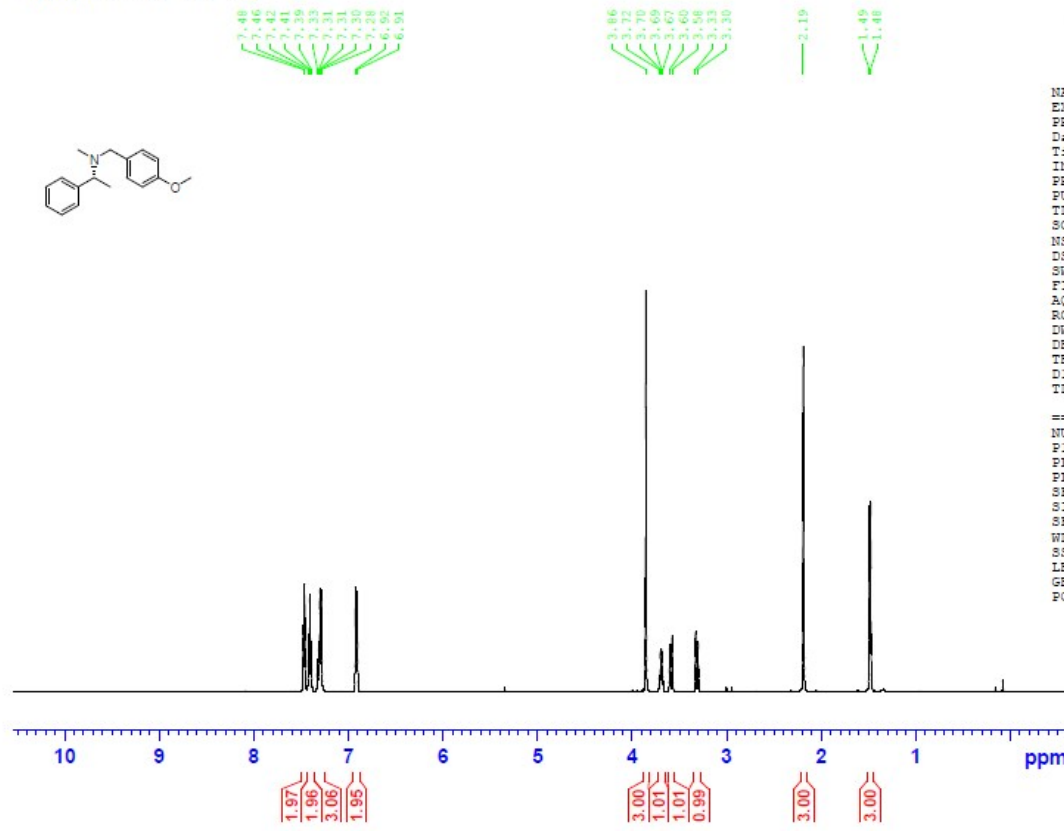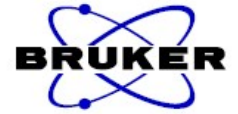

```

NAME      CMX-20190108-1
EXPNO    10
PROCNO   1
Date_    20190108
Time_    10.18
INSTRUM  spect
PROBHD   5 mm F4BBO BB-
PULPROG  zg30
TD        65536
SOLVENT  CDCl3
NS        16
DS        2
SWH       10330.878 Hz
FIDRES    0.157632 Hz
AQ        3.1719523 sec
RG        40.9
DW        48.400 usec
DE        6.50 usec
TE        299.1 K
D1        1.00000000 sec
D11       1
TD0       1

===== CHANNEL f1 =====
NUC1      1H
P1        12.60 usec
PL1        0.00 dB
PL1W      18.83080864 W
SFO1      500.1320000 MHz
SI        32768
SF        500.1300000 MHz
WDW       EM
SSB       0
LB        0.30 Hz
GB        0
PC        1.00
    
```

C13CPD CDC13 3ag

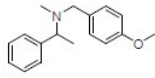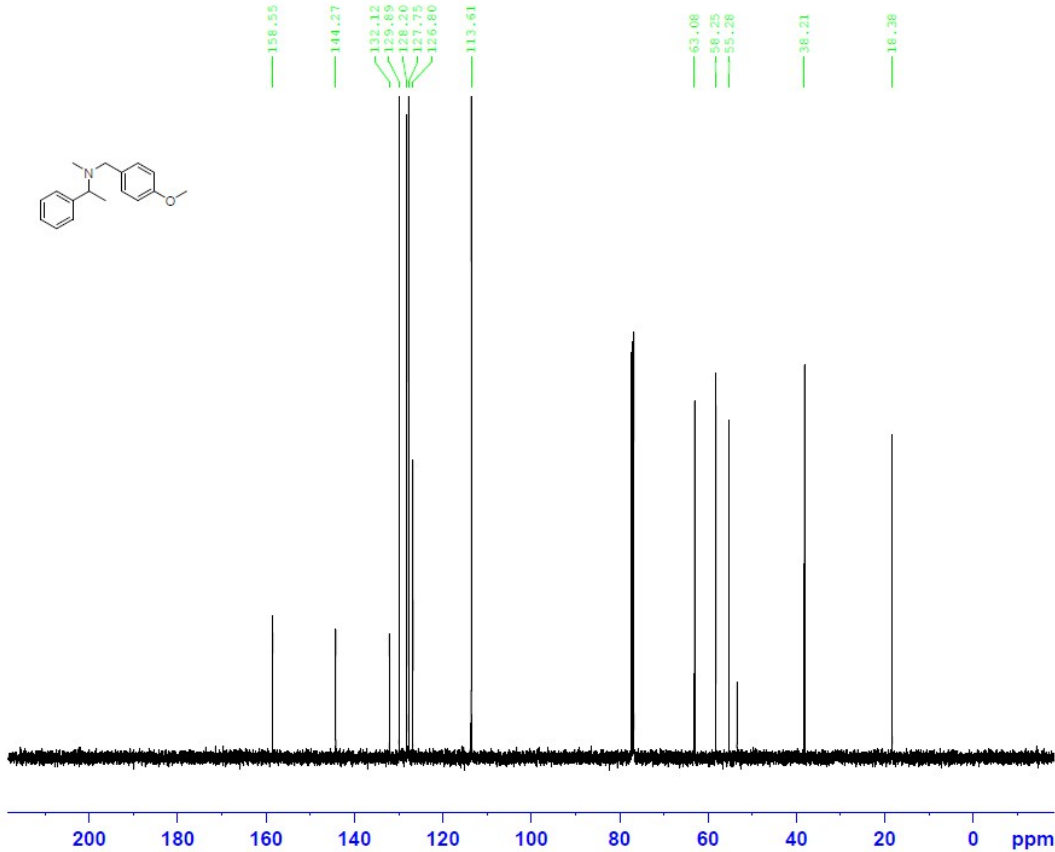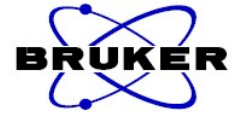

```

NAME      CMX-20190225-15
EXPNO    11
PROCNO   1
Date_    20190225
Time     14.34
INSTRUM  spect
PROBHD   5 mm PABBO BB-
PULPROG  zgpg30
TD        65536
SOLVENT  CDC13
NS        54
DS        4
SWH       29761.904 Hz
FIDRES    0.454131 Hz
AQ        1.1010548 sec
RG        203
DW        16.800 usec
DE        6.50 usec
TE        301.0 K
D1        2.00000000 sec
D11       0.03000000 sec
TD0       1
    
```

```

===== CHANNEL f1 =====
NUC1      13C
P1        9.50 usec
PL1       -1.00 dB
PL1W      112.80287170 W
SFO1      125.7703643 MHz
    
```

```

===== CHANNEL f2 =====
CPDPRG2   waltz16
NUC2      1H
PCPD2     80.00 usec
PL2       0.00 dB
PL12      16.05 dB
PL13      17.00 dB
PL2W      18.83080864 W
PL12W     0.46759412 W
PL13W     0.37572402 W
SFO2      500.1320005 MHz
SI        32768
SF        125.7577890 MHz
WDW       EM
SSB       0
LB        1.00 Hz
GB        0
PC        1.40
    
```

PROTON CDC13 for 3ah

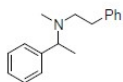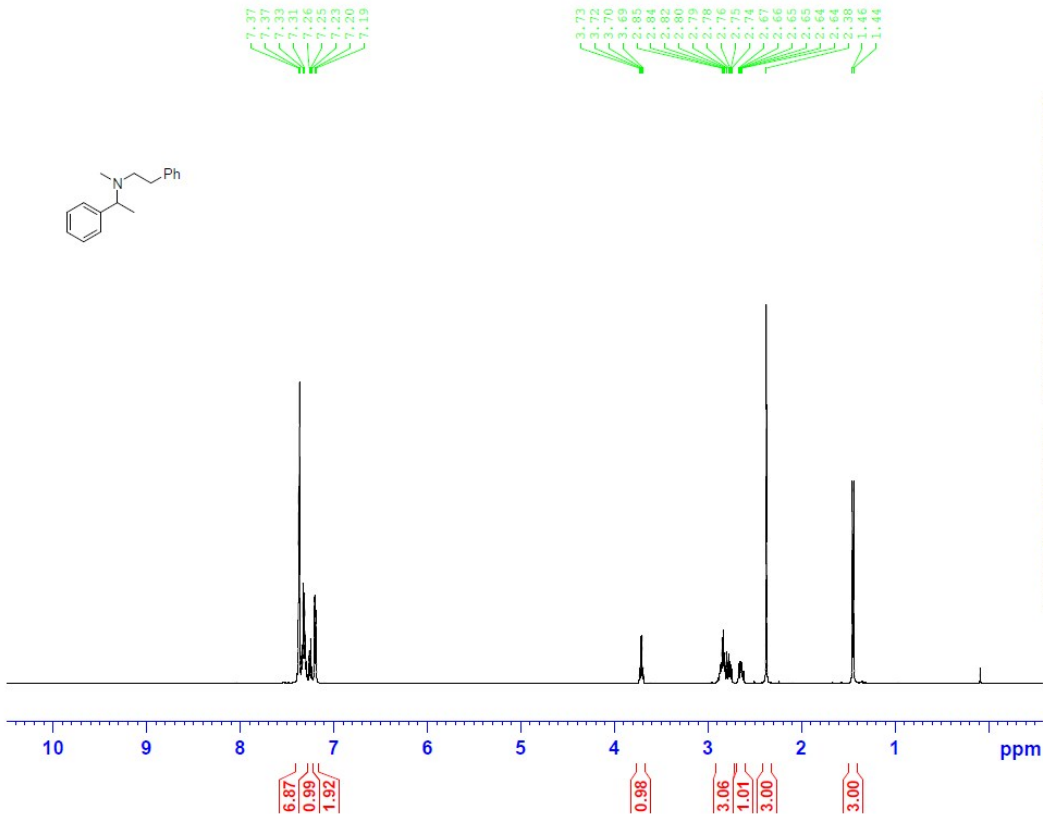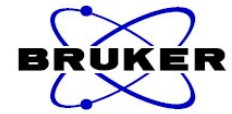

```

NAME      CMX-20181130-1
EXPNO    10
PROCNO   1
Date_    20181130
Time     22.34
INSTRUM  spect
PROBHD   5 mm PABBO BB-
PULPROG  zg30
TD        65536
SOLVENT  CDC13
NS        8
DS        2
SWH       10330.578 Hz
FIDRES    0.157632 Hz
AQ        3.1719923 sec
RG        45.2
DW        48.400 usec
DE        6.50 usec
TE        301.4 K
D1        1.00000000 sec
TD0       1
    
```

```

===== CHANNEL f1 =====
NUC1      1H
P1        12.60 usec
PL1       0.00 dB
PL1W      18.83080864 W
SFO1      500.1330885 MHz
SI        32768
SF        500.1300000 MHz
WDW       EM
SSB       0
LB        0.30 Hz
GB        0
PC        1.00
    
```

C13CPD CDCl3 3ah

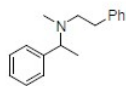

142.57  
140.14  
128.82  
128.43  
128.38  
127.90  
127.10  
126.11

63.61  
56.24  
38.53  
33.27  
18.67

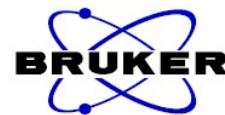

```

NAME      CMX-20190227-15
EXPNO     11
PROCNO    1
Date_     20190228
Time_     9.11
INSTRUM   spect
PROBHD    5 mm PABBO BB-
PULPROG   zgpg30
TD        65536
SOLVENT   CDCl3
NS        64
DS        4
SWH       29761.904 Hz
FIDRES    0.454131 Hz
AQ        1.1010548 sec
RG        203
DW        16.800 usec
DE        6.50 usec
TE        296.9 K
D1        2.00000000 sec
D11       0.03000000 sec
TD0       1
    
```

```

===== CHANNEL f1 =====
NUC1      13C
P1        9.50 usec
PL1       -1.00 dB
PL1W     112.80287170 W
SFO1     125.7703643 MHz
    
```

```

===== CHANNEL f2 =====
CPDPRG2   waltz16
NUC2      1H
PCPD2     80.00 usec
PL2       0.00 dB
PL12     16.05 dB
PL13     17.00 dB
PL2W     18.83080864 W
PL12W    0.46759412 W
PL13W    0.37572402 W
SFO2     500.1320005 MHz
SI        32768
SF        125.7577890 MHz
WDW       EM
SSB       0
LB        1.00 Hz
GB        0
PC        1.40
    
```

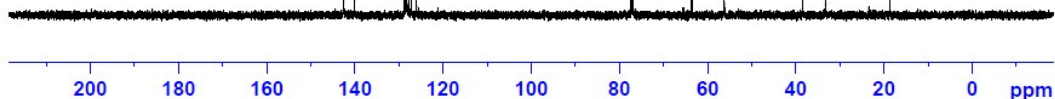

PROTON CDCl3 for 3ai

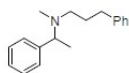

7.38  
7.37  
7.32  
7.31  
7.23  
7.21

3.65  
3.64  
3.63  
3.61

2.66  
2.63  
2.51  
2.42  
2.40  
2.38  
1.85  
1.83  
1.41  
1.40

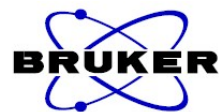

```

NAME      CMX-20181130-2
EXPNO     10
PROCNO    1
Date_     20181130
Time_     22.38
INSTRUM   spect
PROBHD    5 mm PABBO BB-
PULPROG   zg30
TD        65536
SOLVENT   CDCl3
NS        8
DS        2
SWH       10330.578 Hz
FIDRES    0.157632 Hz
AQ        3.1719923 sec
RG        64
DW        48.400 usec
DE        6.50 usec
TE        301.3 K
D1        1.00000000 sec
TD0       1
    
```

```

===== CHANNEL f1 =====
NUC1      1H
P1        12.60 usec
PL1       0.00 dB
PL1W     18.83080864 W
SFO1     500.1330833 MHz
SI        32768
SF        500.1300000 MHz
WDW       EM
SSB       0
LB        0.30 Hz
GB        0
PC        1.00
    
```

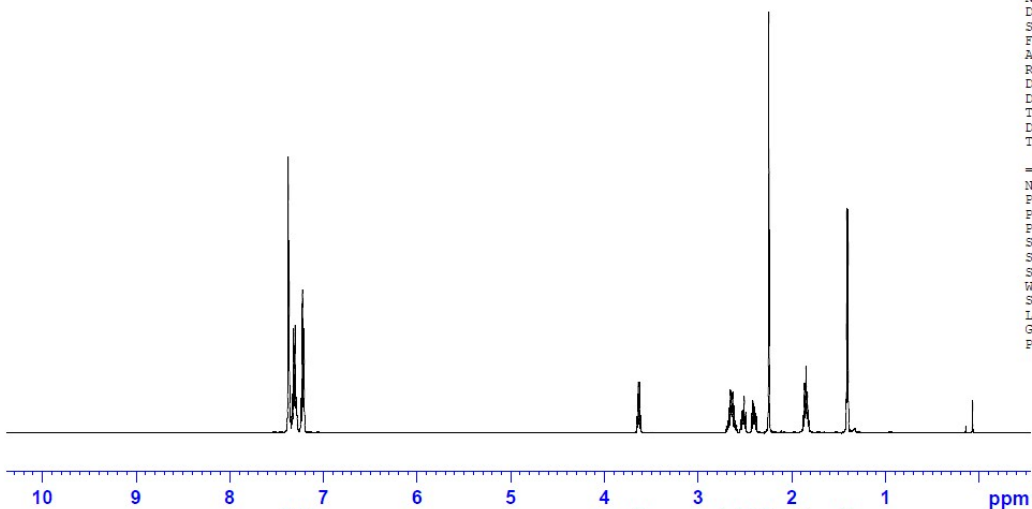

3.93  
3.15  
2.95

1.00  
2.04  
1.04  
3.05  
2.09  
3.08

C13CPD CDC13 3ai

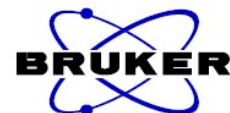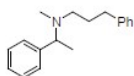

144.06  
142.59  
126.41  
126.26  
128.12  
127.75  
126.74  
125.66  
63.28  
53.88  
38.38  
33.63  
29.03  
18.39

```

NAME      CMX-20181207-02
EXPNO     11
PROCNO    1
Date_     20181207
Time      14.53
INSTRUM   spect
PROBHD    5 mm PABBO BB-
PULPROG   zgpg30
TD        65536
SOLVENT   CDC13
NS        46
DS        4
SWH       29761.904 Hz
FIDRES    0.454131 Hz
AQ        1.1010548 sec
RG        203
DW        16.800 usec
DE        6.50 usec
TE        297.7 K
D1        2.00000000 sec
D11       0.03000000 sec
TD0       1
    
```

```

===== CHANNEL f1 =====
NUC1      13C
P1        9.50 usec
PL1       -1.00 dB
PL1W     112.80287170 W
SFO1     125.7703643 MHz
    
```

```

===== CHANNEL f2 =====
CPDPRG2   waltz16
NUC2      1H
PCPD2     80.00 usec
PL2       0.00 dB
PL12     16.05 dB
PL13     17.00 dB
PL2W     18.83080864 W
PL12W    0.46759412 W
PL13W    0.37572402 W
SFO2     500.1320005 MHz
SI        32768
SF        125.7577890 MHz
WDW       EM
SSB       0
LB        1.00 Hz
GB        0
PC        1.40
    
```

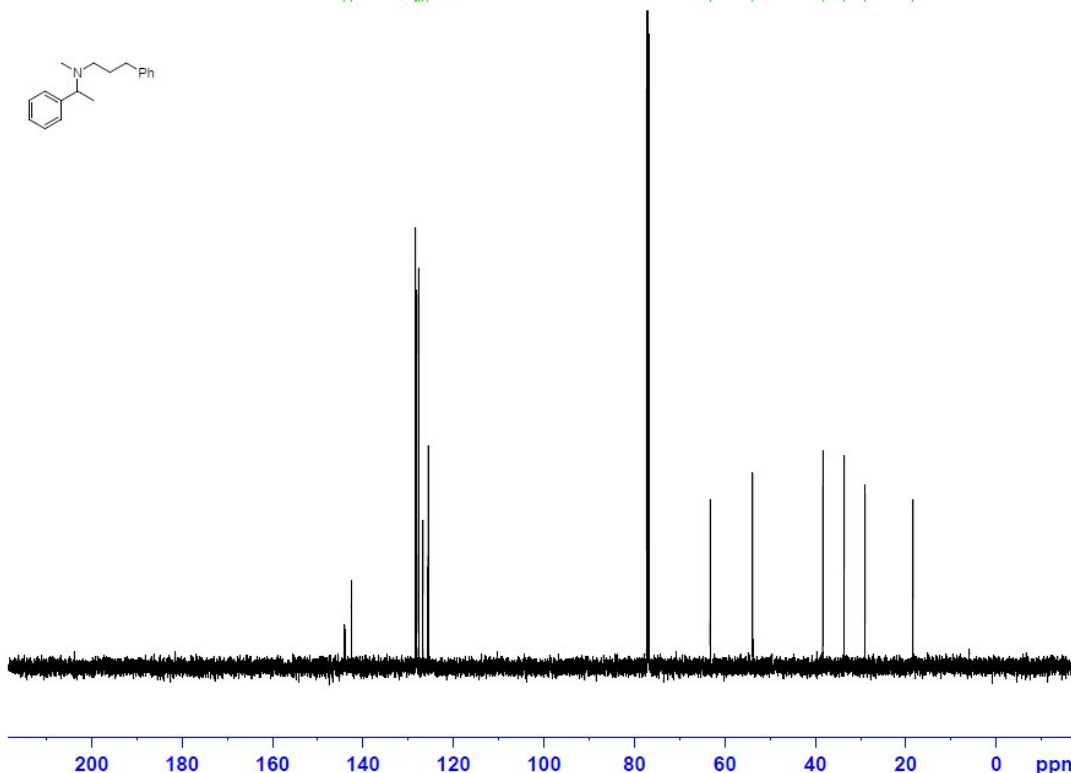

PROTON CDC13 rivastigmine

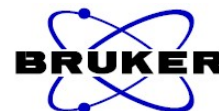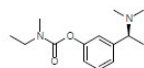

7.34  
7.33  
7.31  
7.31  
7.16  
7.15  
7.10  
7.06  
7.06  
3.53  
3.52  
3.50  
3.49  
3.46  
3.44  
3.43  
3.30  
3.29  
3.28  
3.26  
3.10  
3.03  
2.24  
1.40  
1.39  
1.30  
1.28  
1.27  
1.23  
1.22

```

NAME      CMX-20180116-05
EXPNO     10
PROCNO    1
Date_     20180116
Time      11.34
INSTRUM   spect
PROBHD    5 mm PABBO BB-
PULPROG   zg30
TD        65536
SOLVENT   CDC13
NS        16
DS        2
SWH       10330.578 Hz
FIDRES    0.157632 Hz
AQ        3.1719923 sec
RG        90.5
DW        48.400 usec
DE        6.50 usec
TE        299.0 K
D1        1.00000000 sec
TD0       1
    
```

```

===== CHANNEL f1 =====
NUC1      1H
P1        12.60 usec
PL1       0.00 dB
PL1W     18.83080864 W
SFO1     500.1330885 MHz
SI        32768
SF        500.1300000 MHz
WDW       EM
SSB       0
LB        0.30 Hz
GB        0
PC        1.00
    
```

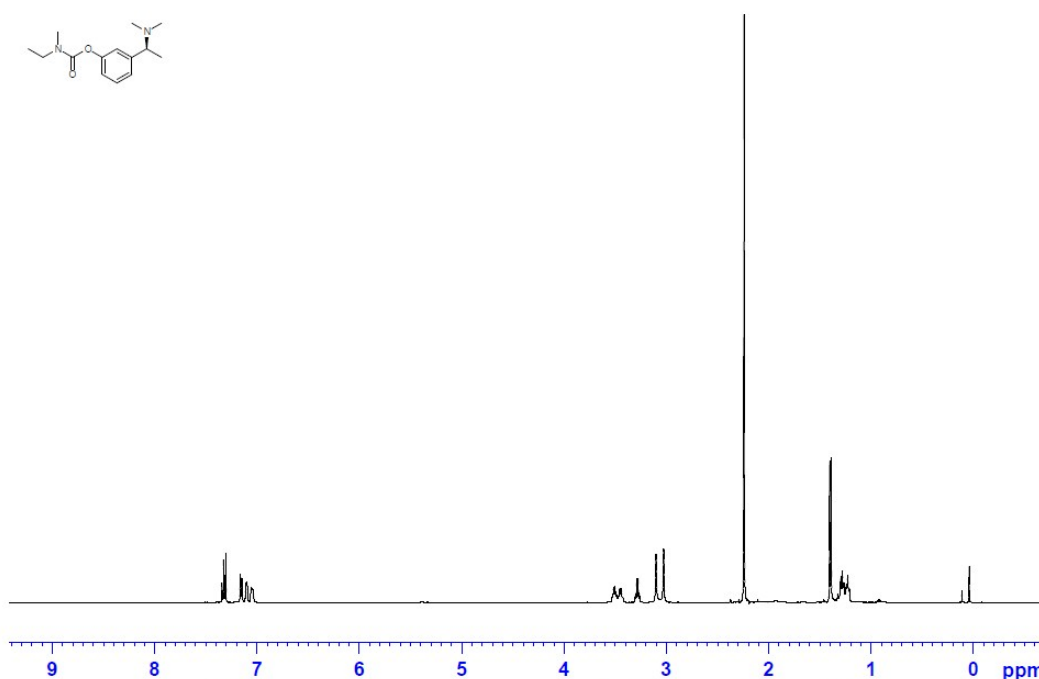

1.31  
0.97  
0.97  
0.95

2.00  
1.00  
2.89

5.97

3.11  
3.39



35 #15 RT: 0.21 AV: 1 NL: 9.48E8  
 T: FTMS + p ESI Full ms [150.00-2000.00]

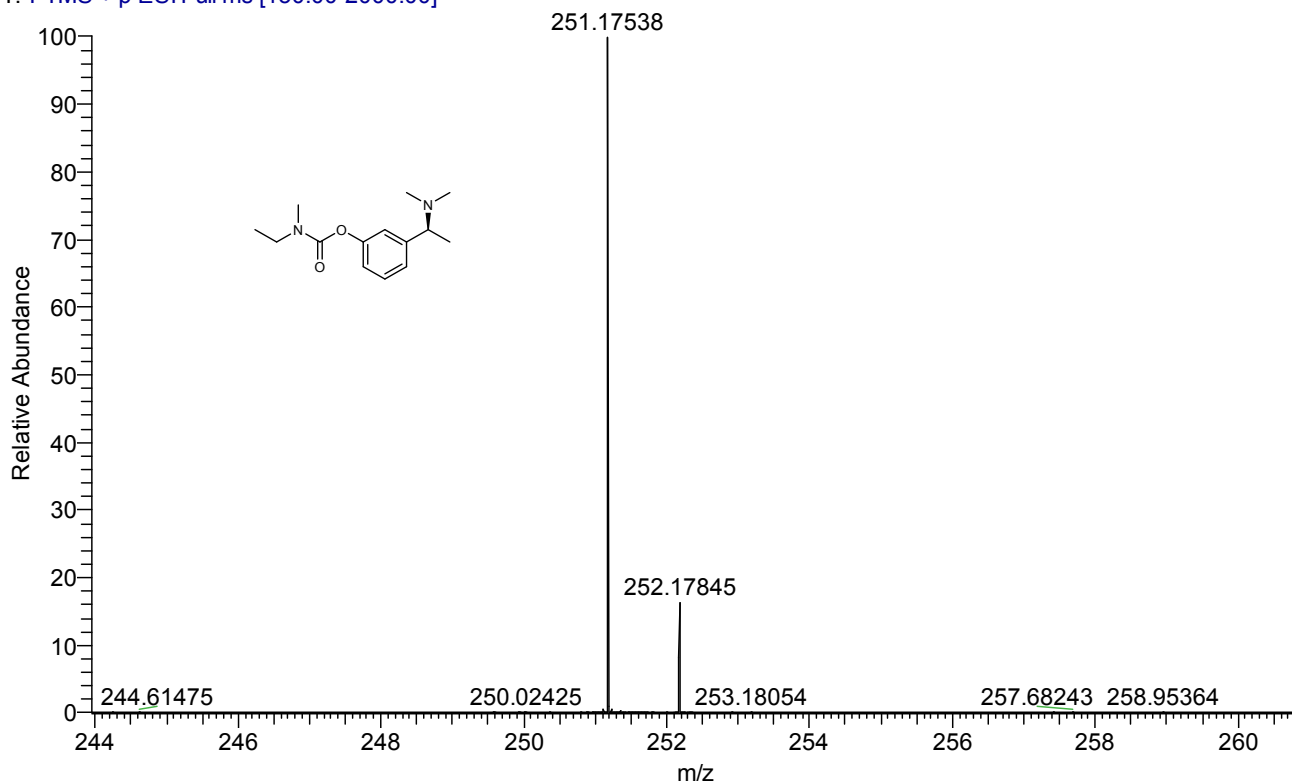

PROTON CDC13 4

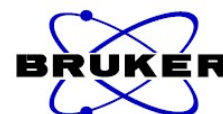

```

NAME      CMX-20180728-7
EXENO     10
PROCNO    1
Date_     20180728
Time      12.39
INSTRUM   spect
PROBHD    5 mm PABBO BB-
PULPROG   zg30
TD        65536
SOLVENT   CDCl3
NS        16
DS        2
SWH       10330.578 Hz
FIDRES    0.157632 Hz
AQ        3.1719923 sec
RG        32
DW        46.400 usec
DE        6.50 usec
TE        303.1 K
D1        1.00000000 sec
TD0       1
  
```

```

===== CHANNEL f1 =====
NUC1      1H
P1        12.60 usec
PL1       0.00 dB
PL1W      18.83080864 W
SFO1      500.1330385 MHz
SI        32768
SF        500.1300000 MHz
WDW       EM
SSB       0
LB        0.30 Hz
GB        0
PC        1.00
  
```

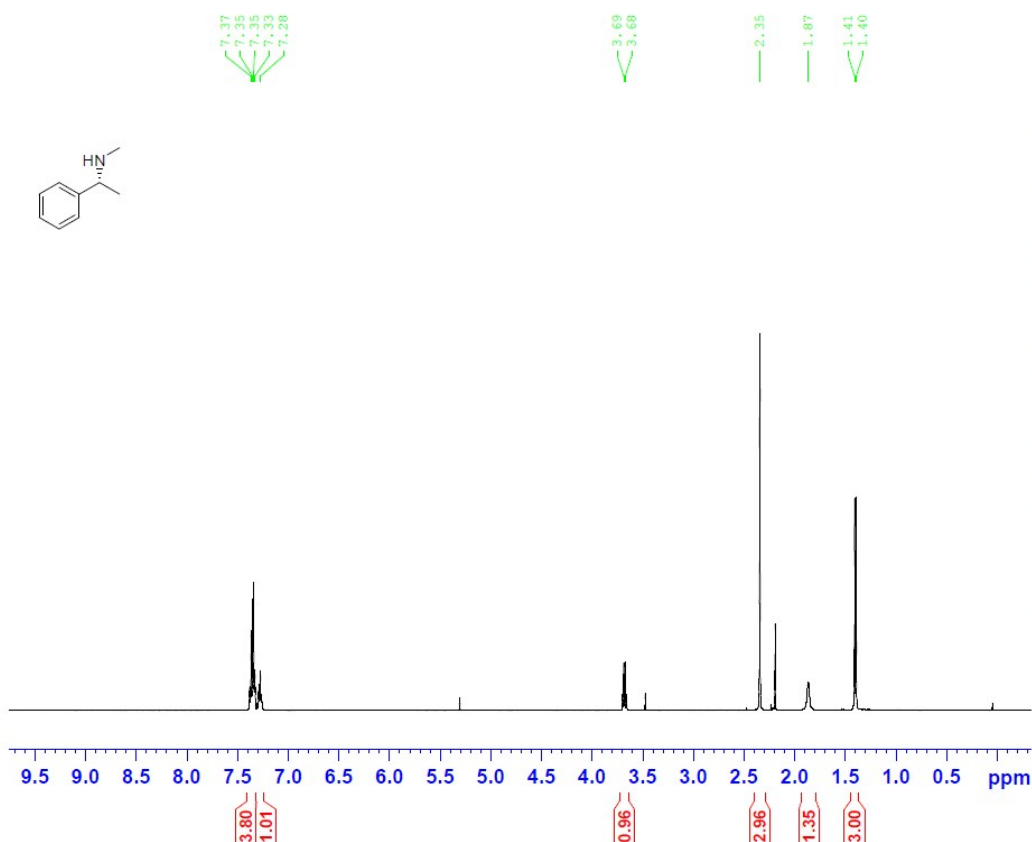

P31CPD CDC13 for L9i

147.79

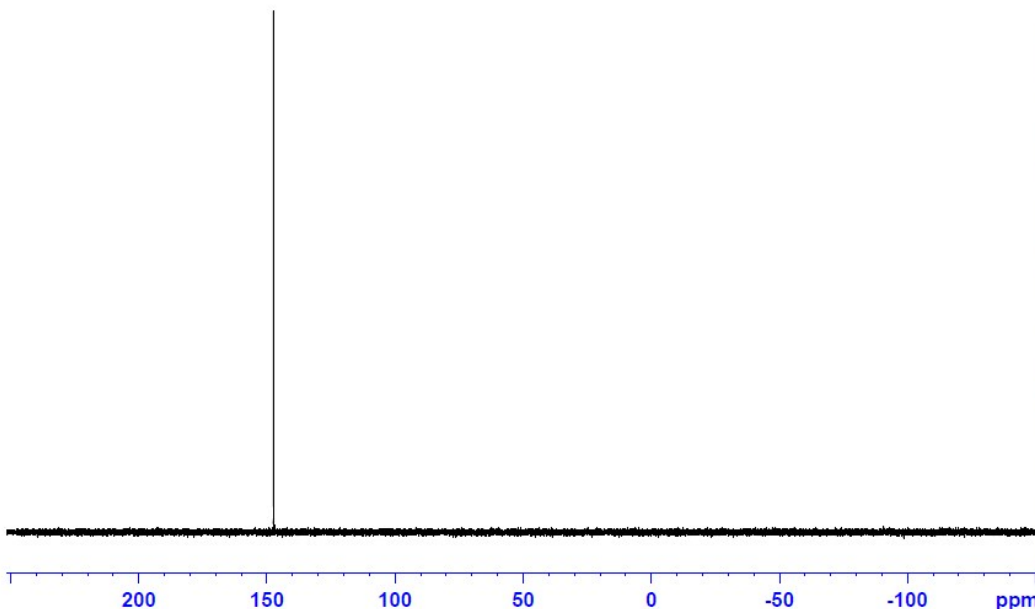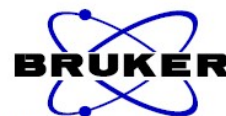

```

NAME      CMX-20190103-09
EXPNO     10
PROCNO    1
Date_     20190103
Time      9.30
INSTRUM   spect
PROBHD    5 mm PABBO BB-
PULPROG   zgpg30
TD        65536
SOLVENT   CDC13
NS        16
DS        4
SWH       81521.742 Hz
FIDRES    1.243923 Hz
AQ        0.4020041 sec
RG        203
DW        6.133 usec
DE        6.50 usec
TE        298.4 K
D1        2.00000000 sec
D11       0.03000000 sec
TD0       1

```

```

===== CHANNEL f1 =====
NUC1      31P
P1        11.30 usec
PL1       0.00 dB
PL1W      82.64508057 W
SFO1      202.4664578 MHz

```

```

===== CHANNEL f2 =====
CPDPRG2   waltz16
NUC2      1H
PCPD2     80.00 usec
PL2       0.00 dB
PL12      16.05 dB
PL13      17.00 dB
PL2W      18.83080864 W
PL12W     0.46759412 W
PL13W     0.37572402 W
SFO2      500.1320005 MHz
SI        32768
SF        202.4563350 MHz
WDW       EM
SSB       0
LB        1.00 Hz
GB        0
PC        1.40

```

P31CPD CDC13 for Ir:L9i 1:1

113.23

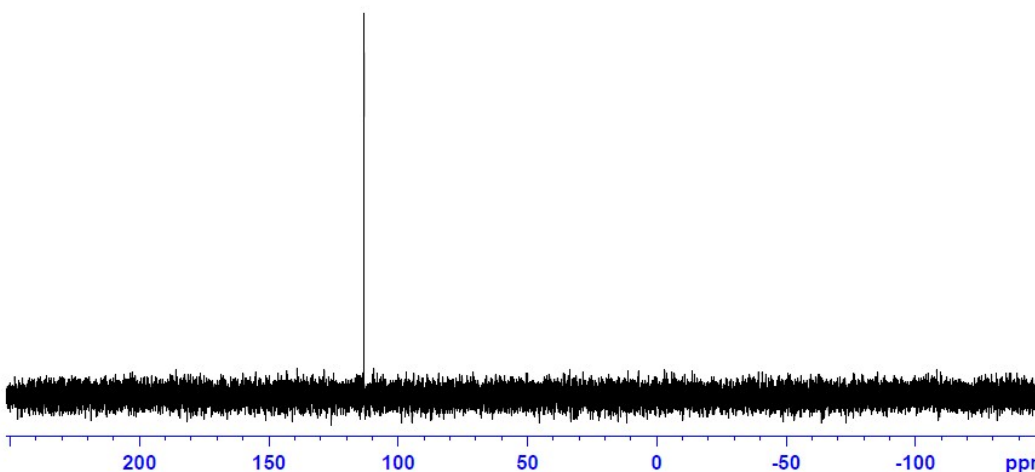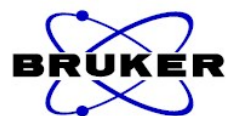

```

NAME      CMX-20190103-04
EXPNO     10
PROCNO    1
Date_     20190103
Time      9.03
INSTRUM   spect
PROBHD    5 mm PABBO BB-
PULPROG   zgpg30
TD        65536
SOLVENT   CDC13
NS        16
DS        4
SWH       81521.742 Hz
FIDRES    1.243923 Hz
AQ        0.4020041 sec
RG        203
DW        6.133 usec
DE        6.50 usec
TE        298.4 K
D1        2.00000000 sec
D11       0.03000000 sec
TD0       1

```

```

===== CHANNEL f1 =====
NUC1      31P
P1        11.30 usec
PL1       0.00 dB
PL1W      82.64508057 W
SFO1      202.4664578 MHz

```

```

===== CHANNEL f2 =====
CPDPRG2   waltz16
NUC2      1H
PCPD2     80.00 usec
PL2       0.00 dB
PL12      16.05 dB
PL13      17.00 dB
PL2W      18.83080864 W
PL12W     0.46759412 W
PL13W     0.37572402 W
SFO2      500.1320005 MHz
SI        32768
SF        202.4563350 MHz
WDW       EM
SSB       0
LB        1.00 Hz
GB        0
PC        1.40

```

P31CPD CDC13 for Ir:19i 1:2

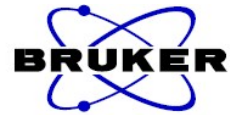

```

NAME      CMX-20190103-05
EXPNO     10
PROCNO    1
Date_     20190103
Time      9.07
INSTRUM   spect
PROBHD    5 mm PABBO BB-
PULPROG   zgpg30
TD        65536
SOLVENT   CDC13
NS        16
DS        4
SWH       81521.742 Hz
FIDRES    1.243923 Hz
AQ        0.4020041 sec
RG        203
DW        6.133 usec
DE        6.50 usec
TE        298.8 K
D1        2.00000000 sec
D11       0.03000000 sec
TD0       1
  
```

```

===== CHANNEL f1 =====
NUC1      31P
P1        11.30 usec
PL1       0.00 dB
PL1W      82.64508057 W
SF01      202.4664578 MHz
  
```

```

===== CHANNEL f2 =====
CPDPRG2   waltz16
NUC2      1H
PCPD2     80.00 usec
PL2       0.00 dB
PL12      16.05 dB
PL13      17.00 dB
PL2W      18.83080864 W
PL12W     0.46758412 W
PL13W     0.37572402 W
SF02      500.1320005 MHz
SI        32768
SF        202.4563350 MHz
WDW       EM
SSB       0
LB        1.00 Hz
GB        0
PC        1.40
  
```

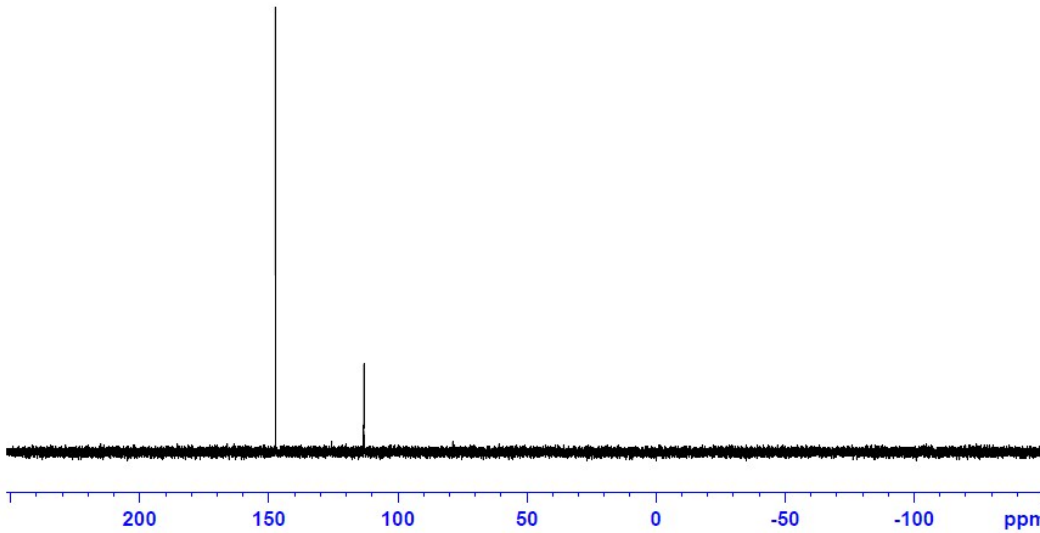

PROTON CDC13 for 3ah from 1a-d3

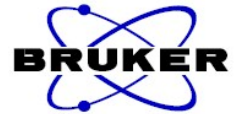

```

NAME      CMX-20190103-01
EXPNO     10
PROCNO    1
Date_     20190103
Time      8.48
INSTRUM   spect
PROBHD    5 mm PABBO BB-
PULPROG   zg30
TD        65536
SOLVENT   CDC13
NS        16
DS        2
SWH       10330.578 Hz
FIDRES    0.157632 Hz
AQ        3.1719923 sec
RG        40.3
DW        48.400 usec
DE        6.50 usec
TE        298.7 K
D1        1.00000000 sec
TD0       1
  
```

```

===== CHANNEL f1 =====
NUC1      1H
P1        12.60 usec
PL1       0.00 dB
PL1W      18.83080864 W
SF01      500.1330885 MHz
SI        32768
SF        500.1300000 MHz
WDW       EM
SSB       0
LB        0.30 Hz
GB        0
PC        1.00
  
```

7.38, 7.37, 7.35, 7.33, 7.32, 7.31, 7.27, 7.25, 7.21, 7.19, 3.74, 3.72, 3.71, 3.70, 2.85, 2.82, 2.80, 2.78, 2.67, 2.66, 2.65, 2.64, 2.64, 2.38, 1.45, 1.45, 1.43

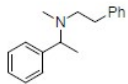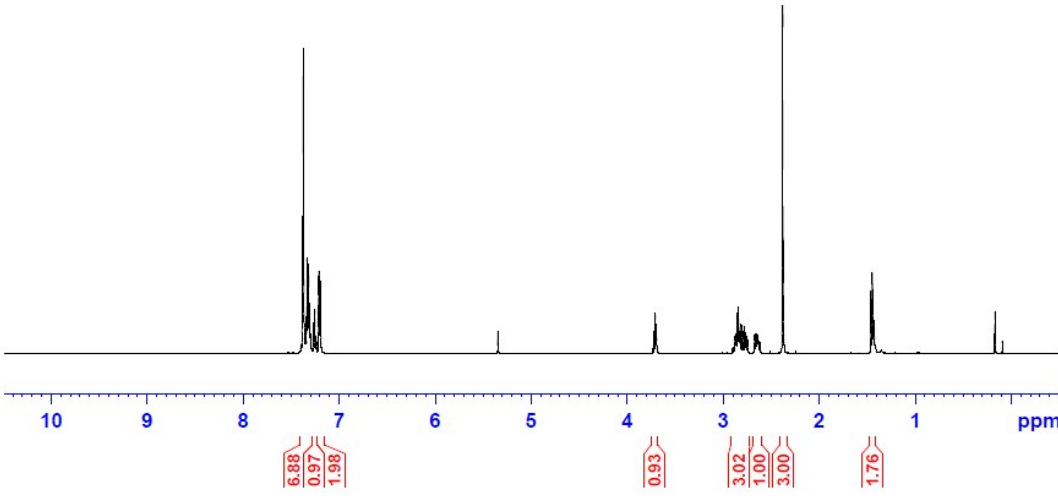

PROTON CDCl3 for 3ah with D2

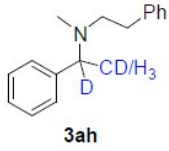

7.40  
7.35  
7.34  
7.24  
7.22

3.74  
3.73  
3.72

2.88  
2.85  
2.80  
2.69  
2.68  
2.40

1.47  
1.45

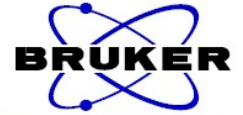

```

NAME      CMX-20181226-01
EXPNO    10
PROCNO   1
Date_    20181226
Time     8.42
INSTRUM  spect
PROBHD   5 mm PABBO BB-
PULPROG  zg30
TD       65536
SOLVENT  CDCl3
NS       16
DS       2
SWH      10330.578 Hz
FIDRES   0.157632 Hz
AQ       3.1719923 sec
RG       32
DW       48.400 usec
DE       6.50 usec
TE       299.9 K
D1       1.00000000 sec
TDO      1
    
```

```

===== CHANNEL f1 =====
NUC1     1H
P1       12.60 usec
PL1      0.00 dB
PL1W     18.83080864 W
SFO1     500.1330885 MHz
SI       32768
SF       500.1300000 MHz
WDW      EM
SSB      0
LB       0.30 Hz
GB       0
PC       1.00
    
```

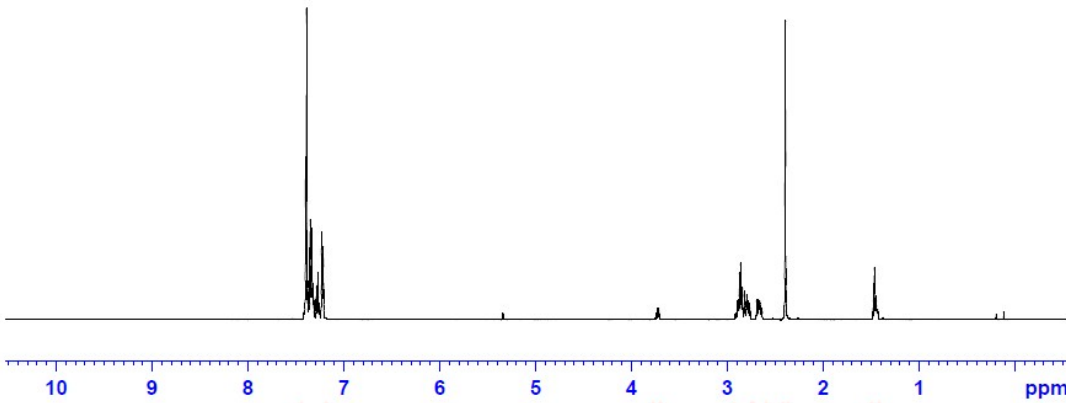

PROTON CDCl3 for 3ah with MeOD

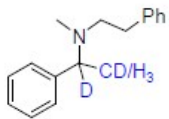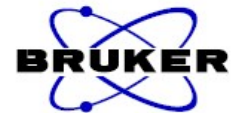

```

NAME      CMX-20181214-11
EXPNO    20
PROCNO   1
Date_    20181214
Time     10.19
INSTRUM  spect
PROBHD   5 mm PABBO BB-
PULPROG  zg30
TD       65536
SOLVENT  CDCl3
NS       16
DS       2
SWH      10330.578 Hz
FIDRES   0.157632 Hz
AQ       3.1719923 sec
RG       30.5
DW       48.400 usec
DE       6.50 usec
TE       298.1 K
D1       1.00000000 sec
TDO      1
    
```

```

===== CHANNEL f1 =====
NUC1     1H
P1       12.60 usec
PL1      0.00 dB
PL1W     18.83080864 W
SFO1     500.1330885 MHz
SI       32768
SF       500.1300000 MHz
WDW      EM
SSB      0
LB       0.30 Hz
GB       0
PC       1.00
    
```

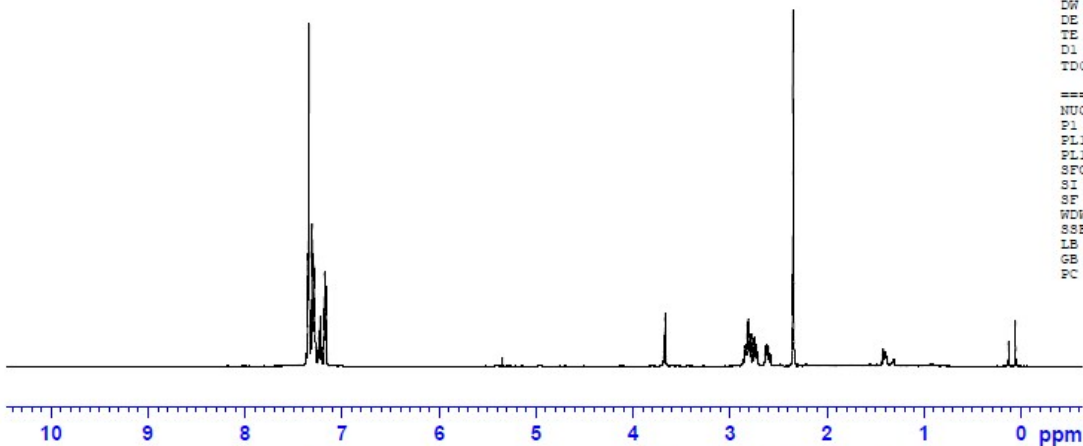

Supplement: SC-010-C9SC00323A-s001.pdf [file SC-010-C9SC00323A-s001.pdf]
